# Supplementary material for: Physical morbidity and psychological and social comorbidities at five stages during pregnancy and after childbirth: a multicountry cross-sectional survey
Source: PubMed Central journal article supplement (PMC9039410; doi:10.1136/bmjopen-2021-050287), 2022-04-25
Supplement: bmjopen-2021-050287.draft_revisions.pdf [file bmjopen-2021-050287.draft_revisions.pdf]

# BMJ Open

BMJ Open is committed to open peer review. As part of this commitment we make the peer review history of every article we publish publicly available.

When an article is published we post the peer reviewers' comments and the authors' responses online. We also post the versions of the paper that were used during peer review. These are the versions that the peer review comments apply to.

The versions of the paper that follow are the versions that were submitted during the peer review process. They are not the versions of record or the final published versions. They should not be cited or distributed as the published version of this manuscript.

BMJ Open is an open access journal and the full, final, typeset and author-corrected version of record of the manuscript is available on our site with no access controls, subscription charges or pay-per-view fees (<http://bmjopen.bmj.com>).

If you have any questions on BMJ Open's open peer review process please email [info.bmjopen@bmj.com](mailto:info.bmjopen@bmj.com)

# BMJ Open

## PHYSICAL MORBIDITY AND PSYCHOLOGICAL AND SOCIAL CO-MORBIDITIES AT FIVE STAGES DURING PREGNANCY AND AFTER CHILDBIRTH – A MULTI-COUNTRY CROSS SECTIONAL SURVEY

|                               |                                                                                                                                                                                                                                                                                                                                                                                                                                                                                                                                                                                                                                                                                                                                                       |
|-------------------------------|-------------------------------------------------------------------------------------------------------------------------------------------------------------------------------------------------------------------------------------------------------------------------------------------------------------------------------------------------------------------------------------------------------------------------------------------------------------------------------------------------------------------------------------------------------------------------------------------------------------------------------------------------------------------------------------------------------------------------------------------------------|
| Journal:                      | <i>BMJ Open</i>                                                                                                                                                                                                                                                                                                                                                                                                                                                                                                                                                                                                                                                                                                                                       |
| Manuscript ID                 | bmjopen-2021-050287                                                                                                                                                                                                                                                                                                                                                                                                                                                                                                                                                                                                                                                                                                                                   |
| Article Type:                 | Original research                                                                                                                                                                                                                                                                                                                                                                                                                                                                                                                                                                                                                                                                                                                                     |
| Date Submitted by the Author: | 20-Feb-2021                                                                                                                                                                                                                                                                                                                                                                                                                                                                                                                                                                                                                                                                                                                                           |
| Complete List of Authors:     | <p>McCauley, Mary; Liverpool School of Tropical Medicine, Centre for Maternal and Newborn Health<br/>         White, Sarah; Liverpool School of Tropical Medicine, International Public Health<br/>         Bar-Zeev, Sarah; Centre for Maternal and Newborn Health, Lilongwe Office, Lilongwe, Malawi<br/>         Godia, Pamela; Liverpool School of Tropical Medicine - Kenya, Centre for Maternal and Newborn Health<br/>         Mittal, Pratima; Department of Obstetrics &amp; Gynecology Vardhman Mahavir Medical College and Safdarjung Hospital, New Delhi-110029, India.,<br/>         Zafar, Shamsa; Air University,<br/>         van den Broek, Nynke; Liverpool School of Tropical Medicine, Centre for Maternal and Newborn Health</p> |
| Keywords:                     | PUBLIC HEALTH, EPIDEMIOLOGY, OBSTETRICS                                                                                                                                                                                                                                                                                                                                                                                                                                                                                                                                                                                                                                                                                                               |
|                               |                                                                                                                                                                                                                                                                                                                                                                                                                                                                                                                                                                                                                                                                                                                                                       |

SCHOLARONE™  
Manuscripts

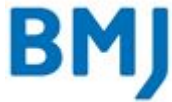

I, the Submitting Author has the right to grant and does grant on behalf of all authors of the Work (as defined in the below author licence), an exclusive licence and/or a non-exclusive licence for contributions from authors who are: i) UK Crown employees; ii) where BMJ has agreed a CC-BY licence shall apply, and/or iii) in accordance with the terms applicable for US Federal Government officers or employees acting as part of their official duties; on a worldwide, perpetual, irrevocable, royalty-free basis to BMJ Publishing Group Ltd ("BMJ") its licensees and where the relevant Journal is co-owned by BMJ to the co-owners of the Journal, to publish the Work in this journal and any other BMJ products and to exploit all rights, as set out in our [licence](#).

The Submitting Author accepts and understands that any supply made under these terms is made by BMJ to the Submitting Author unless you are acting as an employee on behalf of your employer or a postgraduate student of an affiliated institution which is paying any applicable article publishing charge ("APC") for Open Access articles. Where the Submitting Author wishes to make the Work available on an Open Access basis (and intends to pay the relevant APC), the terms of reuse of such Open Access shall be governed by a Creative Commons licence – details of these licences and which [Creative Commons](#) licence will apply to this Work are set out in our licence referred to above.

Other than as permitted in any relevant BMJ Author's Self Archiving Policies, I confirm this Work has not been accepted for publication elsewhere, is not being considered for publication elsewhere and does not duplicate material already published. I confirm all authors consent to publication of this Work and authorise the granting of this licence.

1  
2  
3 **PHYSICAL MORBIDITY AND PSYCHOLOGICAL AND SOCIAL CO-MORBIDITIES AT FIVE STAGES**  
4 **DURING PREGNANCY AND AFTER CHILDBIRTH – A MULTI-COUNTRY CROSS SECTIONAL**  
5 **SURVEY**  
6  
7  
8  
9

10 **Authors:**

11 MCCAULEY, Mary<sup>1,2\*</sup>

12 WHITE, Sarah A<sup>1</sup>

13 BAR-ZEEV, Sarah<sup>3</sup>

14 GODIA, Pamela<sup>4</sup>

15 MITTAL, Pratima<sup>5</sup>

16 ZAFAR, Shamsa<sup>6</sup>

17 VAN DEN BROEK, Nynke<sup>1</sup>

18  
19  
20  
21  
22  
23  
24  
25 <sup>1</sup>Centre for Maternal and Newborn Health, Liverpool School of Tropical Medicine, Liverpool,  
26 United Kingdom

27  
28 <sup>2</sup>Liverpool Women's Hospital, Crown Street, Liverpool, United Kingdom

29  
30 <sup>3</sup>Centre for Maternal and Newborn Health, Lilongwe Office, Lilongwe, Malawi

31  
32 <sup>4</sup>Centre for Maternal and Newborn Health, Nairobi Office, Nairobi, Kenya

33  
34 <sup>5</sup>Department of Obstetrics and Gynaecology, Safdarjung Hospital, New Delhi, India

35  
36 <sup>6</sup>Fazaia Medical College, Air University, Islamabad, Pakistan

37  
38 \*Corresponding author:

39 Mary McCauley

40 Consultant Obstetrician

41 Liverpool Women's Hospital

42 Crown Street

43 Liverpool

44 Email: mary.mccauley@lwh.nhs.uk

45  
46  
47  
48 **Abstract word count:** 297 words

49  
50 **Text word count:** 4827 words  
51  
52  
53  
54  
55  
56  
57  
58  
59  
60

## Abstract

### Objective

Maternal morbidity affects millions of women, the burden of which is highest in low resource settings. We sought to explore when this ill-health occurs and is most significant.

### Settings

A descriptive observational cross-sectional study at primary and secondary-level healthcare facilities in India, Pakistan, Kenya, and Malawi.

### Participants

Women attending for routine antenatal care, childbirth or postnatal care at the study healthcare facilities.

### Primary and secondary outcomes

Physical morbidity (infectious, medical, obstetric), psychological and social morbidity co-morbidity were assessed at five stages: first half of pregnancy ( $\leq 20$  weeks), second half of pregnancy ( $> 20$  weeks), at birth (within 24 hours of childbirth), early postnatal (day 1–7) and late postnatal (week 2–12).

### Results

11,454 women were assessed: India (2,099) Malawi (2,923) Kenya (3,145) and Pakistan (3,287) with similar numbers assessed at each of the five assessment stages in each country. Infectious morbidity and anaemia are highest in the early postnatal stage (26.1%, 53.6% respectively). For HIV, malaria and syphilis combined, prevalence was highest in the first half of pregnancy (10.0%). Hypertension, pre-eclampsia, and urinary incontinence are most common in the second half of pregnancy (4.6%, 2.1%, 6.6%). Psychological (depression, thoughts of self-harm) and social morbidity (domestic violence, substance misuse) are significant at each stage but most commonly reported in the second half of pregnancy (26.4%, 17.6%, 40.3%, 5.9% respectively). Of all women assessed, maternal morbidity was highest in the second half of pregnancy (81.7%), then the early postnatal stage (80.5%). Across the four countries, maternal morbidity was highest in the second half of pregnancy in Kenya (73.8%) and Malawi (73.8%), and in the early postnatal stage in Pakistan (92.2%) and India (87.5%).

## Conclusions

Women have significant maternal multi-morbidity across all stages of the continuum of pregnancy and childbirth, and especially in the second half of pregnancy and after childbirth.

## Keywords

Maternal morbidity, co-morbidity, multi-morbidity, antenatal, postnatal, diagnostic screening, psychological health, social health, low- and middle- income countries.

## Ethics

The Liverpool School of Tropical Medicine, Liverpool, UK, granted full ethical approval (LSTM14.025). Ethical approval was also obtained from each country-specific research ethics committee: The College of Medicine Research and Ethics Committee, College of Medicine, Blantyre, Malawi (P.07/14/1600); Kenyatta National Hospital and University of Nairobi, Ethics and Research Committee, Nairobi, Kenya (P574/09/214); Research and Ethics Committee, Vardhman Mahavir Medical College and Safdarjung Hospital, New Delhi, India (IEC/SJH/VMMC/Project/September-14/19/482); and the National Bioethics Committee, Islamabad, Pakistan (4-87/14/NBC-159/RDC/1850). Written informed consent was obtained from each woman who participated in the study.

## Funding

Global Health Grant (OPP1033805) from Bill and Melinda Gates Foundation via the World Health Organization (WHO) and a grant from the Department of International Development, London UK, under the Making It Happen programme (202945-101). The funders played no role in the writing of the manuscript or the decision to submit it for publication.

## Article summary

### Strengths and limitations of this study

- This is one of the first studies to comprehensively describe the burden of maternal multi-morbidity at five assessment stages during pregnancy and after childbirth, using a standardised approach to assess the physical, psychological, and social components of ill-health in combination with objective clinical and laboratory measurements.
- A large sample (11,454) of women across four low-and middle- income countries were surveyed at five assessment stages during pregnancy and after childbirth.
- The study population assessed women who had accessed care at a healthcare facility for routine antenatal care, childbirth and/or postnatal care, and was not able to assess the burden of maternal morbidity in women who did not access care.
- We did not assess women who may have experienced adverse pregnancy outcome (e.g. stillbirth) and such women might have an even higher burden of pregnancy related morbidity.
- The study population we assessed in each country may not be generalizable to different regions of the same country or to other low-and middle-income countries.

## Introduction

The global maternal health agenda has undergone a re-focus from preventing maternal deaths to promoting women's health and wellness [1,2]. Addressing the burden of maternal multi-morbidity during and after pregnancy and the need to prevent and treat chronic and non-communicable diseases, is gaining importance as new focus for global initiatives, consistent with the current international strategy that all women have the right to the highest attainable standard of health and well-being, including all dimensions of health i.e. physical, psychological and social health [1,2,3]. An international aim is to ensure that every woman in every setting has an equal chance to 'survive and thrive' during and after pregnancy and that every mother can enjoy a wanted and healthy pregnancy, safe childbirth and full recovery after childbirth [1,2]. However, currently this is not the case with many women living in low- and middle- income countries (LMIC) with recent studies reporting that there is likely to be a significant burden of physical morbidity and co-morbidities during and after pregnancy which may remain un-recognised if care services are not improved [4-7].

Over the past 10 years, the focus of many maternal health intervention programs in LMIC has been centred on care during childbirth and the time immediately after birth with the aim to reduce the global burden of maternal deaths, stillbirths and early neonatal deaths; 'the triple return' [2]. Focusing only on the number of women who die, ignores the women who suffer both severe and non-severe complications related to pregnancy and childbirth [8,9]. Until recently, less emphasis has been placed on ensuring the availability and quality of maternity care during and after pregnancy, and the need to improve maternal health outcomes and experiences.

Maternal morbidity represents a critical interface in the continuum between a healthy pregnancy and childbirth and maternal death [10]. While some mothers will recover from their experienced ill-health with or without treatment, others will not. An increased awareness and understanding of the burden of physical morbidity and associated psychological and/or social co-morbidity, along with prevention, early recognition and appropriate management where required, are important steps that need to be taken to improve maternal health, avert adverse pregnancy outcomes and potentially averting preventable deaths [4-11]. Maternal morbidity is defined as 'any health condition attributed to and/or complicating pregnancy, and childbirth that has a negative impact on the woman's



1  
2  
3 wellbeing' [12]. Several recent studies have attempted to describe and/or measure the  
4 burden of maternal morbidity in line with this new definition in women in low resources  
5 settings [4-7,13-15]. However, there is still a lack of information regarding when (during  
6 pregnancy or after childbirth) this burden occurs and is most significant. This should inform  
7 when the optimal timing is for screening, prevention, and management.  
8  
9  
10  
11  
12

13  
14 The objective of this study was to assess the prevalence and types of maternal morbidity and  
15 co-morbidities for each of five different stages during and after pregnancy and to assess if there  
16 are differences in the trends of occurrence and types of physical morbidity, and psychological  
17 and social co-morbidity at different stages.  
18  
19  
20  
21  
22

## 23 **Materials and Methods**

### 24 **Study design and settings**

25  
26 The details of the study design, setting, participants have been described previously [6]. In  
27 summary, we conducted a descriptive observational cross-sectional study in India, Pakistan,  
28 Kenya, and Malawi, across a representative sample of 12 secondary and 17 primary care  
29 level facilities in rural and urban areas.  
30  
31  
32  
33  
34  
35

### 36 **Participants**

37  
38 All women attending for antenatal care, childbirth or postnatal care at the study healthcare  
39 facilities were eligible for inclusion. Women who were too ill to participate (for example  
40 altered conscious level, admission to high dependency unit or intensive care unit) were  
41 excluded. Each woman was assessed at one of the five stages of pregnancy: first half of  
42 pregnancy ( $\leq 20$  weeks), second half of pregnancy ( $> 20$  weeks), birth (within 24 hours of  
43 childbirth), early postnatal (days 1-7) and late postnatal (weeks 2-12). For the antenatal  
44 assessments, gestation was calculated based on the women's last menstrual period or the  
45 results of a dating scan if available. Women were recruited sequentially until the target  
46 sample size for each assessment stage was reached in each healthcare facility. All women who  
47 consented to take part in the study were interviewed and had a full clinical examination, and  
48 basic urine and serological investigations performed by trained healthcare providers  
49 (midwives and doctors). Data was collected using a standardised structured questionnaire  
50  
51  
52  
53  
54  
55  
56  
57  
58  
59  
60

1  
2  
3 formatted onto electronic tablets in India, Pakistan and Kenya. Paper questionnaires were  
4 used in Malawi. Demographics including age, marital status, occupation and educational level  
5 and socio-economic status were assessed. Current physical symptoms were assessed using  
6  
7 76 questions covering six organ systems - cardiopulmonary, gastrointestinal, musculoskeletal,  
8  
9 uro-gynaecology, obstetric, and breast, and miscellaneous (dermatology, endocrine,  
10  
11 neurological, immunology, ear-nose-throat). Psychological health was assessed using the  
12  
13 Edinburgh Postnatal Depression Scale (EPDS) using a cut-off point of >10 [15]. The 'Hurt,  
14  
15 Insulted, Threatened, Screamed at' (HITS) questionnaire was used to assess domestic  
16  
17 violence, from the husband or partner and/or other family members (with a score of >10  
18  
19 indicating significant abuse) [16]. Four questions from the 'Alcohol, Smoking and Substance  
20  
21 Involvement Screening Test (ASSIST)' questionnaire were included [17].  
22

23  
24 Clinical parameters including height, weight, pulse rate (PR), respiratory rate (RR), blood  
25  
26 pressure (BP), and oral temperature (T) were measured and the conjunctiva, sclera, breast,  
27  
28 abdomen (general and obstetric) were examined. Inspection of the perineum and/or  
29  
30 speculum examination was only conducted if clinically indicated (for symptoms of vaginal  
31  
32 discharge, bleeding, pain).

33  
34 Urinalysis was performed using Multistix GP<sup>®</sup>. A simple finger prick test was used to obtain  
35  
36 one capillary (<0.5ml) of blood for use in four rapid diagnostic tests: haemoglobin  
37  
38 (Hemocue<sup>®</sup>), malaria (Humasis<sup>®</sup>), syphilis and Human Immunodeficiency Virus (HIV) (SD  
39  
40 BIOLINE HIV/Syphilis Duo<sup>®</sup>), and C-reaction protein (CRP) (QuickRead<sup>®</sup>). A reported symptom  
41  
42 of cough >two weeks was used to identify chest infection and/or suspected tuberculosis.  
43  
44 Anaemia was classified as haemoglobin less than 110 g/l (WHO 2011). Hypertension was  
45  
46 classified as BP $\geq$ 140/90 [18]. Pre-eclampsia was defined as BP $\geq$ 140/90, and proteinuria (PR  
47  
48 >+++ on urinalysis) after 20 weeks' gestation [19]. We amended the Systematic Inflammatory  
49  
50 Response Syndrome (SIRS) to define possible early infection as the presence of two or more  
51  
52 of the following: (1) T>38 °C or <36°C, (2) PR>90 beats per minute; (3) RR>20 breaths per  
53  
54 minute or (4) raised CRP (defined as >5mg/dL at each assessment stage, apart from the early  
55  
56 postnatal period (first 7 days) where raised CRP was defined as >10mg/dL [20]. Antenatal  
57  
58 haemorrhage was defined as women who reported bleeding per vagina during pregnancy  
59  
60 and/or who had this confirmed-on examination. Incontinence was defined as all women who  
reported any leakage of urine and/or had this confirmed-on examination. Summative physical  
morbidity was categorised as (1) infectious or (2) medical or obstetric. Infectious morbidity

1  
2  
3 included: HIV, malaria, syphilis, chest infection and/or suspected tuberculosis, and a SIRS  
4 score of  $\geq 2$ . Medical or obstetric morbidity included: anaemia, hypertension, pre-eclampsia,  
5 antenatal haemorrhage, and urinary incontinence. Psychological morbidity was defined as an  
6 EPDS score of  $\geq 10$  and/or thoughts of self-harm. Social morbidity was defined as a woman  
7 reporting any domestic violence (HITS score  $>4$ ) and/or any substance misuse. Maternal  
8 morbidity was considered as at least one physical morbidity, or psychological or social co-  
9 morbidity.  
10  
11  
12  
13  
14  
15  
16

### 17 **Sample size calculation and statistical analysis**

18  
19  
20 In Pakistan, Kenya, and Malawi for each of the five assessment stages, data were collected  
21 for a minimum of 576 women across two levels of healthcare facility (primary and secondary)  
22 selected by stratified cluster sampling [6]. In India, as the study was conducted in one facility  
23 (secondary level facility offering primary and secondary care) a cluster sampling approach was  
24 not required, giving an amended sample size of 1,900 with a minimum of 380 women per  
25 assessment stage [6]. This sample size had 95% power to detect the presence of any morbidity  
26 with a prevalence greater than 1%. Data analysis was performed using SPSS version 22 and  
27 Stata version 12.1. Unless otherwise stated, all percentages reported use the total sample  
28 size for the relevant country. Where a substantial percentage of women have data missing  
29 for a variable ( $>10\%$ ) this is stated in the text, but the numbers missing are not tabulated.  
30 Percentages are derived using the number of women who responded per assessment stage.  
31 Analysis was conducted separately for each stage of pregnancy for each country and then for  
32 each stage of pregnancy for women in all countries combined as a cohort.  
33  
34  
35  
36  
37  
38  
39  
40  
41  
42  
43  
44

### 45 **Ethics**

46  
47 This research was conducted along with the ethics from the Declaration of Helsinki. The  
48 Liverpool School of Tropical Medicine, Liverpool, UK, granted full ethical approval  
49 (LSTM14.025). Ethical approval was also obtained from each country-specific research ethics  
50 committee: The College of Medicine Research and Ethics Committee, College of Medicine,  
51 Blantyre, Malawi (P.07/14/1600); Kenyatta National Hospital and University of Nairobi, Ethics  
52 and Research Committee, Nairobi, Kenya (P574/09/214); Research and Ethics Committee,  
53 Vardhman Mahavir Medical College and Safdarjung Hospital, New Delhi, India  
54  
55  
56  
57  
58  
59  
60

(IEC/SJH/VMMC/Project/September-14/19/482); and the National Bioethics Committee, Islamabad, Pakistan (4-87/14/NBC-159/RDC/1850). Written informed consent was obtained from each woman who participated in the study.

### Patient and public involvement

No patient nor members of the public were involved in the design, conduct or dissemination of this study.

## Results

### Study population

A total of 11,454 women across four LMICs were assessed: India (2,099), Pakistan (3,287), Kenya (3,145) and Malawi (2,923) with similar numbers of women assessed at each of the five stages, during and after pregnancy. The socio-demographic and obstetric characteristics of women per stage are displayed in **Supplementary Table 1**. Results are reported for the combined cohort of women and where there are significant differences between the women from each country, these are commented upon in the narrative text. Data obtained for each country for each pregnancy stage are detailed in **Supplementary Tables 2-9**.

### Reported symptoms and severity for each stage of pregnancy

Overall, 8,420 women (73.5%) reported at least one symptom of ill-health at any of the assessment points during or after pregnancy with a median (interquartile range) of 2 (0-5) symptoms per woman. The number of symptoms reported by women varied statistically significantly with stage of pregnancy (using categories presented in **Figure 1**,  $X^2=330$ ,  $df=12$ ,  $p<0.001$ ). In the second half of pregnancy the median (IQR) was 3 (1-6), which was significantly higher than for the other stages, and in the late postnatal stage it was 1 (0-3) whereas for the first half of pregnancy it was 2 (0-4), within 24 hours of childbirth it was 2 (1-5) and early postnatal it was 2 (0-5). The percentage of women with reported ill-health (at least one symptom reported) was highest within 24 hours of childbirth (80.9%), with 77.0% in the second half of pregnancy and 74.7% in the early postnatal but not very different to the first half of pregnancy (72.1%) or late postnatal (62.0%) (**Figure 1**). The percentage of women who reported at least four symptoms was highest (43.1%) in the second half of pregnancy. The percentage of women reporting that they had symptoms that were bothering them 'a lot' was similar at each stage of pregnancy (**Figure 1**) and ranged from 11.0% to 16.6%.

1  
2  
3 Women living in Pakistan reported higher severities of symptoms compared to India, Kenya,  
4 and Malawi; and across all five assessment points. At the start of the pregnancy 11.7% of  
5 women had  $\geq 3$  abnormalities on clinical examination and 22.2% of women had  $\geq 2$   
6 abnormalities on urine and/or blood investigation (**Figure 1**). The highest percentage of  
7 women with  $\geq 3$  abnormalities on clinical examination  $\geq 2$  abnormalities on urine and/or blood  
8 investigation were in the early postnatal stage (23.5% and 37.1% respectively) (**Figure 1**).  
9  
10  
11  
12  
13

### 14 Infectious morbidity

15  
16  
17 The percentage of women with early signs of infection (SIRS score  $\geq 2$ ) was highest in the early  
18 postnatal period (26.1%) and second half of pregnancy (25.1%). Similar percentages of  
19 women were detected to be HIV positive across all five assessment stages. The percentage of  
20 women with malaria and syphilis was highest in the first half of pregnancy (3.9% and 1.6%  
21 respectively) with decreased prevalence at subsequent points (**Table 1**). For the three main  
22 diseases combined (malaria, syphilis, and HIV), prevalence was 8.4% overall and highest in the  
23 first half of pregnancy (10.0%). This varied per country (**Supplementary Tables 2-5**) and was  
24 0.4% in India, 0.6% in Pakistan with no syphilis and rare cases of malaria), 4.1% in Kenya  
25 (mainly HIV) substantially higher in Malawi (27.9% including HIV 14.3%, malaria 10.2% and  
26 syphilis 3.4%). The proportion of women with a positive SIRS score was highest in Kenya in  
27 the early postnatal period (44.8%) followed by Malawi at 30.1% in the early postnatal period,  
28 16.6% in India and 15.9% in Pakistan, both in the second half of pregnancy.  
29  
30  
31  
32  
33  
34  
35  
36  
37  
38  
39

### 40 Medical and Obstetric morbidity

41  
42  
43 Overall, 1 in 2 women had anaemia during or after pregnancy, the prevalence of was highest  
44 in the early postnatal period (53.6% with 2.8% severe anaemia) with 40% of women anaemic  
45 in early pregnancy (**Table 1**). The prevalence of anaemia was particularly high in Pakistan in  
46 the second half of pregnancy (76.8% with 3.5% severe anaemia), and in India in the early  
47 postnatal period (71.5% with 3.9% severe anaemia) (**Supplementary Table 2-5**). With regards  
48 to nutritional status, 3.0% of women had a low BMI ( $<18.5\text{kg/m}^2$ ) in the first half of pregnancy  
49 and in the early postnatal stage (**Table 1**). Overall, at the start of pregnancy, women with a  
50 low BMI ( $<18.5\text{kg/m}^2$ ) was between 3.1% and 7.4%. Overall, the highest prevalence of  
51 hypertension or pre-eclampsia was in the second half of pregnancy (4.6% and 2.1%  
52 respectively) and this was similar across all four countries; except in India, where the highest  
53  
54  
55  
56  
57  
58  
59  
60

percentage of women with pre-eclampsia was in the early postnatal stage (0.2%). Urinary incontinence was consistently most commonly reported in the second half of pregnancy (6.6% overall) dropping to 3.3% in the late postnatal period. Urinary incontinence was comparatively higher in Pakistan with late postnatal urinary incontinence in 10.2% of women in the late postnatal period compared to nil in India, 0.3% in Malawi and 1.4% in Kenya. Overall, antenatal haemorrhage was reported in 6.3% of women in the first half of pregnancy stage and 3.0% in the second half of pregnancy.

Overall, as a combined cohort 50.0% of women had at least one medical or obstetric morbidity; with the highest prevalence in the early postnatal stage, in India (72.0%) and Kenya (34.5%) or the second half of pregnancy in Pakistan (80.6%) and Malawi (44.8%) (**Supplementary Tables 2-5**).

### Psychological co-morbidity

Overall, 26.7% of women reported psychological morbidity; 22.9% of women had an EPDS score of  $\geq 10$ ; and 15.2% of women reported thoughts of self-harm [6]. Depression was the commonest form of psychological morbidity at each assessment stage, with the highest percentage of women reporting symptoms of depression or thoughts of self-harm in the second half of pregnancy (26.4% and 17.6% respectively) compared to the early (22.2% and 15.5%) or late postnatal periods (20.3% and 15.7%) (**Table 2**). These trends were similar in India, Pakistan, and Kenya but in Malawi, psychological morbidity was highest within 24 hours of childbirth (18.9%) (**Supplementary Tables 6-9**).

### Social co-morbidity

Overall, 3883 (33.9%) women reported domestic violence (HITS  $>4$ ) and 969 (8.5%) reported higher levels of domestic violence (HITS $>10$ ) from their partner/husband and or family members [6]. The highest percentage of women who reported domestic violence (HITS  $>4$ ), and higher levels of domestic violence (HITS $>10$ ) was in the second half of pregnancy stage (40.3% and 28.6% respectively) (**Table 2**). Higher percentages of women reported domestic violence in the second half of pregnancy in Pakistan (60.4%), Kenya (29.4%) and Malawi (24.3%), compared to India, where more women reported domestic violence in the early postnatal period (43.7%) (**Supplementary Tables 6-9**).

1  
2  
3 Overall, 672 (5.9%) women reported substance misuse, of which 202 (1.8%) required  
4 intervention and this was highest in Pakistan and India in the early postnatal period (12.0 and  
5 2.8% respectively) (**Supplementary Tables 6,7**) and in the late postnatal period in Kenya  
6 (9.6%) or within 24 hours of childbirth in Malawi (5.3%) (**Supplementary Tables 8,9**).

### 11 **Multi-morbidity for each pregnancy stage**

12  
13  
14 Overall, 8936 (78.0%) women reported maternal morbidity (infectious, medical, obstetric,  
15 psychological, or social) [6]. The percentages of women reporting maternal morbidity were  
16 Pakistan: 90.1%, India: 83.9%, Malawi: 71.9%, and Kenya: 67.1%. Of all women assessed,  
17 occurrence of maternal morbidity was highest in the second half of pregnancy (81.7%);  
18 followed by the early postnatal stage (80.5%), and within 24 hours of childbirth (79.0%).  
19 Similar percentages of women had maternal morbidity in the first half of pregnancy (74.8%)  
20 and the late postnatal stage (73.9%). The highest occurrence of maternal morbidity was in the  
21 second half of pregnancy in Kenya (73.8%) and Malawi (73.8%). In India and Pakistan, the  
22 highest percentage of women who had maternal morbidity was in the early postnatal stage  
23 (87.5%, 92.2% respectively). As a combined cohort, the different types of maternal morbidity  
24 occurred in similar measures across the continuum of pregnancy and childbirth (**Figure 2**).  
25 The range of variation in the means was about 5% for infectious and psychological morbidity,  
26 and about 10% for medical/obstetric and social morbidities (**Figure 2**).

## 39 **Discussion**

### 41 **Main findings**

42 Women have significant maternal morbidity at all stages, and especially in the second half of  
43 pregnancy and after childbirth. Most women report symptoms after childbirth (80.9%) but  
44 the maximum number of different symptoms is experienced in the second half of pregnancy  
45 with a median (IQR) of 3 (1-6) symptoms reported per woman. In this population of women  
46 attending for 'routine' antenatal or postnatal care, the proportion of women with an  
47 abnormal examination was highest in the first half of pregnancy (62.8%) as was the proportion  
48 with at least one abnormal investigation (67.3%).

49 The burden of infectious morbidity was found to be highest in the early postnatal stage with  
50 26.1% of women having possible early signs of infection (SIRS score  $\geq 2$ ) but 1 in 5 women had  
51 possible early signs of infection early or late in pregnancy and in the late postnatal period.  
52  
53  
54  
55  
56  
57  
58  
59  
60

1  
2  
3 The burden of infectious disease varied per country with malaria, syphilis and HIV more  
4 common in Malawi and Kenya (27.9% and 4.1% respectively) than in Pakistan or India  
5 although up to 1 in 15 women have evidence of infective morbidity most commonly in the  
6 second half of pregnancy (14.6% in India and 12.6% in Pakistan). Anaemia including severe  
7 anaemia is most commonly seen in the early postnatal stage (53.6%) but up to 64.1% of  
8 women in Pakistan are already anaemic in the first half of pregnancy. As expected,  
9 hypertension, pre-eclampsia and urinary incontinence were more common in the second half  
10 of pregnancy and haemorrhage more common in early pregnancy. Psychological morbidity  
11 including thoughts of self-harm (29.7% and 17.6% respectively) was most commonly  
12 diagnosed in late pregnancy with still significant but lower prevalence in the late postnatal  
13 period (24.9% and 15.7%). Similarly, the social morbidity was found to be highest in the  
14 second half of pregnancy with overall 40% of women reporting domestic violence from their  
15 husband or family. Substance abuse was comparatively low with up to 2.2% of women overall  
16 having an ASSIST score of >4 in the late postnatal period.

### 27 **Strengths and limitations of the study**

28  
29  
30  
31 To the best of our knowledge, this is the first study to measure the burden of maternal multi-  
32 morbidity in a large sample (11,454) of women across four LMICs considering five separate  
33 stages during pregnancy and after childbirth. Our study provides measurements of maternal  
34 physical morbidity (categorised as infective, medical, or obstetric) as well as co-morbidities  
35 (categorised as psychological and/or social) using clear and concise definitions and clinical  
36 assessment methodology, enabling comparisons between different settings and countries.  
37 We documented very low refusal rate (range 1.1% -2.5%) and working in 'real life' settings  
38 during routine antenatal and postnatal care provision in each setting and conclude that it is  
39 acceptable to women and their healthcare providers, and in principle feasible, to screen  
40 women for all the different types of morbidity as part of routine healthcare consultations.  
41 Further strengths of this study are that both subjective (self-reported symptoms) and  
42 objective measures (examination and investigations) are included enabling a 'diagnosis' to be  
43 made where needed rather than using a syndromic approach only. Finally, women were  
44 assessed as late as up to 12 weeks' post-childbirth.

45  
46 We note that this study population assessed women who had accessed care at a healthcare  
47 facility for routine antenatal or postnatal and was not able to assess the burden of maternal  
48  
49  
50  
51  
52  
53  
54  
55  
56  
57  
58  
59  
60



1  
2  
3 morbidity in women who did not access care and/or in women who may have experienced  
4 adverse pregnancy outcome (e.g. stillbirth) and who do not generally attend for postnatal  
5 care. Such women might have an even higher burden of pregnancy related morbidity.  
6  
7 However, we note that many women in these settings do access care at least once during  
8 pregnancy (77%) and that skilled birth attendance during childbirth is more common (55%)  
9 [21,22].  
10  
11  
12  
13

### 14 **Interpretation (considering other evidence)**

15  
16 There are a small number of studies conducted to date that have assessed maternal morbidity  
17 at different stages during and after pregnancy in LMIC settings [4-7,13,23]. We consider the  
18 findings for each type of morbidity below.  
19  
20  
21  
22

### 23 **Infectious morbidity (considering other evidence)**

24  
25 Infectious morbidity is traditionally considered to be a concern after childbirth as 'puerperal  
26 sepsis' [24]. However, our study demonstrates that women have early signs of infection (using  
27 an adapted SIRS score) from as early as the first half of pregnancy (21.0%), and throughout  
28 later pregnancy and childbirth (25.1 - 21.3%) up to 12 weeks postnatal (23.1%); and that the  
29 potential causes of infection was not commonly HIV, TB or malaria. Our findings reflect a  
30 similar study where 'fever of unknown origin' was noted to be highest in the second half of  
31 pregnancy in Malawi (3.5%) and in the first half of pregnancy in Pakistan (3.6%) [7]. In another  
32 study, 6% of women reported febrile symptoms at 4-12 weeks; 11% at 12-24 weeks and 13%  
33 at 24-26 weeks after childbirth in Kenya [23]. Further studies are needed to explore the  
34 significance of possible proxy-measurements of infectious morbidity and to diagnose and  
35 manage underlying infection. In our study the prevalence of malaria and syphilis was highest  
36 in the first half of pregnancy stage, suggesting that with screening these conditions are  
37 detected and treated early; and/or prophylactic measures are successfully implemented (for  
38 example malaria nets and anti-malaria prophylaxis). These findings are like those reported in  
39 a similar study where the highest percentage of women with malaria was in the early  
40 pregnancy stage in Malawi (8.8%) and Pakistan (2.1%) [7]. In our study, detection of HIV was  
41 highest in the early postnatal stage (5.4%). This is a similar finding to that of the Zafar et al  
42 study where the highest percentage of women diagnosed with HIV was in the postnatal stage  
43 in Malawi (16.5%) and Pakistan (7.0%) [7]. A suggested explanation for these findings could  
44 be that these women did not attend for and/or receive screening during antenatal care but  
45  
46  
47  
48  
49  
50  
51  
52  
53  
54  
55  
56  
57  
58  
59  
60

1  
2  
3 did attend for childbirth at the healthcare facility and were screened for HIV as an inpatient.  
4  
5 In the Cherish et al study, infectious morbidity was assessed at different stages after childbirth  
6  
7 in women in Kenya; with possible markers of urinary tract infection (leucocytes and nitrites  
8  
9 in the urine) more frequent at 4-12 weeks and 12-24 weeks after childbirth [23].

### 10 **Medical and obstetric morbidity (considering other evidence)**

11  
12  
13 In our study, anaemia continues to be a major morbidity at all stages during and after  
14  
15 pregnancy, and many women start their pregnancy anaemic. The severity of anaemia  
16  
17 increased as the pregnancy continued, and more women had severe anaemia in the early  
18  
19 postnatal stage; and this trend was similar in the four LMIC settings. In a study assessing  
20  
21 maternal morbidity in Kenya, the highest percentage of women with anaemia (61.0%) was at  
22  
23 12-24 weeks after childbirth [23]. However, this study did not assess women during  
24  
25 pregnancy.

26  
27 In our study, the percentage of women with hypertension/pre-eclampsia was highest in the  
28  
29 second half of pregnancy stage; and the highest percentage of women diagnosed with  
30  
31 antepartum haemorrhage was in the first half of pregnancy stage. In our study, the highest  
32  
33 percentage of women reporting urinary incontinence was in the second half of pregnancy  
34  
35 stage 6.6%. In the Zafar et al study, the highest percentage of women reporting incontinence  
36  
37 (urine or faeces) was in the postnatal stage in Malawi (0.9%) and Pakistan (4.7%) [7]. In the  
38  
39 Cherish et al study, 2% of women had urine incontinence at 12-24 weeks, and 1% of women  
40  
41 had urine incontinence at 4-12 weeks and 24-26 weeks after childbirth in Kenya [23]. In our  
42  
43 study 3.3% of women continued to report urinary incontinence in the late postnatal stage and  
44  
45 this may represent possible early obstetric fistula. However, in our study women who  
46  
47 reported persistent urinary incontinence postnatally were referred for specialist input and we  
48  
49 did not have capacity to follow these patients up for a confirmed diagnosis of possible  
50  
51 obstetric fistula.

### 52 **Psychological morbidity (considering other evidence)**

53  
54 Psychological morbidity is traditionally considered to be more significant after pregnancy,  
55  
56 where it is termed 'postnatal depression'. The findings of the prevalence of psychological  
57  
58 morbidity in our study are higher than previous global estimates of 10% of women during  
59  
60 pregnancy and 13% of women after childbirth being affected by psychological ill-health [25].

1  
2  
3 The findings from our study are more like those of a systematic review of studies from LMIC  
4 settings where psychological morbidity was reported to affect 15.6% of women during  
5 pregnancy and 19.8% after pregnancy [26]. Another review reported a prevalence of 1 in 4  
6 women in LMIC settings reporting depression during pregnancy and 1 in 5 reported  
7 depression after pregnancy [27]. The authors of the review suggest that the figures in LMIC  
8 settings are twice the rate of women in high income countries, and suggest that psychological  
9 morbidity in general is not reported, not assessed properly, infrequently recognised and  
10 under-treated in many LMIC [26].  
11  
12  
13  
14  
15  
16  
17

### 18 **Social morbidity (considering other evidence)**

19  
20  
21 In our study, high percentages of women reported domestic violence and low percentages of  
22 women reported substance misuse. In the Barreix et al study, 12.8% of women self-reported  
23 exposure to violence during pregnancy and 11.0% after childbirth [1]. In the study by Cherish  
24 et al, only postnatal women were assessed, and more women reported domestic violence -  
25 physical (23.3%), sexual (56.9%) - and substance misuse (11%) at 12-24 weeks compared to  
26 4-12 weeks and 24-26 weeks after childbirth in Kenya [23].  
27  
28  
29  
30  
31

### 32 **Practical and research recommendations**

33  
34 With emerging evidence of the different types of physical multi-morbidity and co-morbidity  
35 at specific stages during and after pregnancy, there is a need for comprehensive and detailed  
36 longitudinal studies of women from early pregnancy to an extended postpartum period to  
37 understand how health and symptoms and signs of ill-health change over time and how  
38 current antenatal and postnatal programmes can be improved to address these [28].  
39 Similarly, there is a gap between measuring morbidity for programmatic purposes and  
40 assessing its actual impact on a woman's sense of well-being [29]. Recent studies have  
41 explored women's lived experiences of ill-health and perceptions of their health needs during  
42 and after pregnancy and these findings, in addition to the findings of our study, need to be  
43 considered when developing maternal health interventions to improve the quality of  
44 maternity care at different stages during pregnancy and after childbirth for women living in  
45 LMIC [30, 31].  
46  
47  
48  
49  
50  
51  
52  
53  
54  
55  
56  
57  
58  
59  
60

## Conclusion

The overall findings from our study suggest that there is a large burden of physical morbidity, (including infectious, medical, obstetric), psychological and social co-morbidities in women during pregnancy and up to 12 weeks postnatal who access care in different levels of healthcare facilities across the four LMIC in which this study was conducted. Most importantly, the overall burden of disease is not simply at one 'high risk' stage of pregnancy, but women report and/or are diagnosed with significant physical maternal morbidity and psychological and social co-morbidities throughout the continuum of pregnancy and childbirth. At present, available antenatal and especially postnatal care packages across different settings are not adequate to screen for all forms of physical morbidity (including infectious, medical, obstetric) and psychological and social co-morbidities; and do not address the needs of women in a comprehensive holistic way. Anaemia and possible signs of early infection represent a significant burden of ill-health and may be useful clinical proxy markers for maternal physical morbidity. There is a need to increase the focus of high quality comprehensive maternity care (including mental and social healthcare screening and management), from the first half of pregnancy through to the late postnatal stage, to ensure improved health and well-being for women and their babies during and after pregnancy, and not just at the time of childbirth. There is a need for further research to understand how to support healthcare providers to screen for and provide evidence based care all aspects of maternal multi-morbidity (physical, mental and social) at all contacts during pregnancy and after childbirth.

## DECLARATIONS

### Author's contributions

MMc co-ordinated and supervised the in-country data collection, collected data, conducted data analysis, data interpretation and wrote the manuscript. SW helped design the study, checked all data analysis, and performed further analyses. SBZ supervised the data collection in Malawi, PG in Kenya, PM in India, and SZ in Pakistan. NvdB developed the study design and protocol, oversaw the design, and conduct of the study, data collection and analysis and wrote the manuscript. All authors have read, edited, and approved the final manuscript for submission.

### Acknowledgements

We would like to thank all the women who participated, all the research assistants and research supervisors in each healthcare facility involved in this study. A concept note to the Bill and Melinda Gates Foundation for a maternal morbidity programme was jointly developed by Professor Nynke van den Broek and Dr Lale Say. The maternal morbidity assessment tool used in this study was reviewed by members of the WHO Maternal Morbidity Working Group: Lale Say, Doris Chou, Priya Agrawal, Jose Guilherme Ceccatti, Peter von Dadelszen, Olubukola Fawole, Tabassum Firoz, Veronique Filippi, Atif Ghérissi, Gathari Ndirangu Gichuhi, Gill Gyte, Anoma Jayathilaka, Majorie Koblinsky, Yacouba Kone, Rachel van der Kruik, Isabelle Lange, Affette McCaw-Binns, Mark Morgan, Stephen Munjanja, Cihan Öztopcu, Elizabeth Sullivan, Ozgë Tunçalp.

### Ethics

The Liverpool School of Tropical Medicine, Liverpool, UK, granted full ethical approval (LSTM14.025). Ethical approval was also obtained from each country-specific research ethics committee: The College of Medicine Research and Ethics Committee, College of Medicine, Blantyre, Malawi (P.07/14/1600); Kenyatta National Hospital and University of Nairobi, Ethics and Research Committee, Nairobi, Kenya (P574/09/214); Research and Ethics Committee, Vardhman Mahavir Medical College and Safdarjung Hospital, New Delhi, India (IEC/SJH/VMMC/Project/September-14/19/482); and the National Bioethics Committee, Islamabad, Pakistan (4-87/14/NBC-159/RDC/1850). Written informed consent was obtained from each woman who participated in the study.

### Disclosure of Funding

This study was funded by two grants given to the Centre for Maternal and Newborn Health at the Liverpool School of Tropical Medicine in the UK: a Global Health Grant (OPP1033805) from Bill and Melinda Gates Foundation via the World Health Organization (WHO) and a grant from the Department of International Development, London UK, under the Making it Happen programme (202945-101). The funders played no role in the writing of the manuscript or the decision to submit it for publication.

### Patient and Public Involvement

No patient or member of the public were involved in the design, conduct or dissemination of this study.

### Competing interests

The authors declare no competing interests.

### Availability of data and materials

Extra data is available from the corresponding author on reasonable request.

## Abbreviations

|        |                                                           |
|--------|-----------------------------------------------------------|
| ANC    | Antenatal care                                            |
| ASSIST | Alcohol, Smoking and Substance Involvement Screening Test |
| BP     | Blood pressure                                            |
| CRP    | C-reactive protein                                        |
| EPDS   | Edinburgh Postnatal Depression Scale                      |
| HITS   | Hurt, Insulted, Threatened, Screamed                      |
| HIV    | Human Immunodeficient Virus                               |
| ICT    | Islamabad Capital Territory                               |
| LMIC   | Low- and middle-income countries                          |
| MMR    | Maternal mortality ratio                                  |
| PNC    | Postnatal care                                            |
| PR     | Pulse rate                                                |
| QOL    | Quality of Life                                           |
| RR     | Respiratory rate                                          |
| SAMM   | Severe acute maternal morbidity                           |
| SDI    | Socio-demographic Index                                   |
| T      | Temperature                                               |
| TB     | Tuberculosis                                              |

## References

1. Transforming our world: the 2030 Agenda for Sustainable Development. Available at: [http://www.un.org/ga/search/view\\_doc.asp?symbol=A/RES/70/1&Lang=E](http://www.un.org/ga/search/view_doc.asp?symbol=A/RES/70/1&Lang=E) Accessed January 2021
2. United Nations. Every Woman, Every Child: Global Strategy; 2015. Accessed January 2021. Available at: <http://www.everywomaneverychild.org/global-strategy-2>.
3. Vos T, Barber RM, Bell B, et al. Global, regional, and national incidence, prevalence, and years lived with disability for 301 acute and chronic diseases and injuries in 188 countries, 1990–2013: a systematic analysis for the Global Burden of Disease Study 2013. *Lancet*. 2015;386:743–800. [https://doi.org/10.1016/S0140-6736\(15\)60692-4](https://doi.org/10.1016/S0140-6736(15)60692-4).
4. Barreix M, Barbour K, McCaw-Binns A, Chou D, Petzold M, Gichuhi GN, Gadama L, Taalo F, Tunçalp Ö, Say L. Standardizing the measurement of maternal morbidity: Pilot study results. *Int J Gynecol Obstet*, 2018; 141: 10-19.
5. Reece J, McCauley M, McCaw-Binns A, White SA, Samms-Vaughan M, van den Broek N. (2020) Maternal morbidity: a longitudinal study of women's health during and up to 22 months after pregnancy in Jamaica, *Psychology, Health & Medicine*, 25:6, 687-702, DOI: 10.1080/13548506.2019.1691243
6. McCauley M, Madaj B, White S, Dickinson F, Bar-Zeev S, et al. Measuring the burden of physical, psychological and social ill-health during and after pregnancy in India, Pakistan, Kenya and Malawi. April 2018. *BMJ Global Health*.
7. Zafar S, Jean-Baptiste R, Rahman A, Neilson JP, van den Broek NR. Non-life threatening maternal morbidity: cross sectional surveys from Malawi and Pakistan. *PLoS One*. 2015;10(9):e0138026.
8. Say L, Souza JP, Pattinson RC, WHO working group on Maternal Mortality and Morbidity classifications. Maternal near miss—towards a standard tool for monitoring quality of maternal health care. *Best Pract Res Clin Obstet Gynaecol* 2009; 23:287–96. DOI: 10.1016/j.bpobgyn.2009.01.007
9. Firoz T, McCaw-Binns A, Filippi V, Magee LA, Costa ML, Cecatti JG, Barreix M, Adanu R, Chou D, Say L. A framework for healthcare interventions to address maternal morbidity *Int J Gynecol Obstet*, 2018; 141: 61-68.
10. Vanderkruik RC, Tunçalp O, Chou D, Say L. Framing maternal morbidity: WHO scoping exercise. *BMC Pregnancy Childbirth*. 2013; 13:213.
11. Chou D, Tunçalp Ö, Firoz T, Barreix M, Filippi V, von Dadelszen P, et al. Constructing maternal morbidity – towards a standard tool to measure and monitor maternal health beyond mortality. *BMC Pregnancy Childbirth*. 2016;16:45.
12. Firoz T, Chou D, von Dadelszen P, Agrawal P, Vanderkruik R, Tunçalp Ö, et al. Measuring maternal health: focus on maternal morbidity. *Bull World Health Organ*. 2013;91(10):794–6.
13. Assarag B, Dubourg D, Maaroufi A, Dujardin B, De Brouwere V. Maternal postpartum morbidity in Marrakech: what women feel what doctors diagnose? *BMC Pregnancy Childbirth*. 2013;13:225.



- 1
  - 2
  - 3
  - 4
  - 5
  - 6
  - 7
  - 8
  - 9
  - 10
  - 11
  - 12
  - 13
  - 14
  - 15
  - 16
  - 17
  - 18
  - 19
  - 20
  - 21
  - 22
  - 23
  - 24
  - 25
  - 26
  - 27
  - 28
  - 29
  - 30
  - 31
  - 32
  - 33
  - 34
  - 35
  - 36
  - 37
  - 38
  - 39
  - 40
  - 41
  - 42
  - 43
  - 44
  - 45
  - 46
  - 47
  - 48
  - 49
  - 50
  - 51
  - 52
  - 53
  - 54
  - 55
  - 56
  - 57
  - 58
  - 59
  - 60
14. McCauley M, Zafar S, van den Broek N. Maternal multimorbidity during pregnancy and after childbirth in women in low- and middle-income countries: a systematic literature review. *BMC Pregnancy Childbirth* 20, 637 (2020). <https://doi.org/10.1186/s12884-020-03303-1>
15. Cox JL, Holden JM, and Sagovsky R. 1987. Detection of postnatal depression: Development of the 10-item Edinburgh Postnatal Depression Scale. *British Journal of Psychiatry* 150:782-786.
16. Sherin KM, Sinacore JM, Li XQ, Zitter RE, Shakil A. HITS: a short domestic violence screening tool for use in a family practice setting. *Fam Med* 1998;30(7):508-12
17. World Health Organization (2010) The ASSIST project - Alcohol, Smoking and Substance Involvement Screening Test. Accessed July 2018. Available at: [http://www.who.int/substance\\_abuse/activities/assist/en/](http://www.who.int/substance_abuse/activities/assist/en/)
18. World Health Organization (2011) Haemoglobin concentrations for the diagnosis of anaemia and of severity. Geneva, Switzerland: World Health Organization. Accessed July 2018. Available at: <http://www.who.int/vmnis/indicators/haemoglobin.pdf>
19. Brown MA, Lindheimer MD, de Swiet M et al. The classification and diagnosis of the hypertensive disorders of pregnancy: statement from the International Society for the Study of Hypertension in Pregnancy (ISSHP). *Hypertension in Pregnancy* 2001; 20:(1) IX-XIV
20. Severe Sepsis and Septic Shock in Pregnancy. *Obstetrics & Gynecology*, Vol. 120, No. 3, Sept.2012, p.689-706 Balk 2014
21. World Health Organization 2015. *World Health Statistics 2015*. Geneva: World Health Organization, 2015.
22. World Health Organization 2018. *World Health Statistics: monitoring for the SDGs*. Available at: <https://apps.who.int/iris/bitstream/handle/10665/272596/9789241565585-eng.pdf> Accessed January 2021
23. Chersich MF, Kley N, Luchters SMF, Njeru C, Yard E, Othigo MJ, et al. Maternal morbidity in the first year after childbirth in Mombasa Kenya; a needs assessment. *BMC Pregnancy Childbirth*. 2009;9:51.
24. Bonet M, Brizuela V, Abalos E, Cuesta C, Baguiya A, Chamillard M, et al. Frequency and management of maternal infection in health facilities in 52 countries (GLOSS): a 1-week inception cohort study. *The Lancet Global Health*. 2020;8(5):e661-e71.
25. WHO 2017. *Maternal mental health*. Available at: <https://www.who.int/teams/mental-health-and-substance-use/maternal-mental-health> Accessed January 2021
26. Fisher J, Cabral de Mello M, Patel V, et al. Prevalence and determinants of common perinatal mental disorders in women in low- and lower-middle-income countries: a systematic review. *Bull World Health Organ*. 2012;90(2):139G-149G. doi:10.2471/BLT.11.091850
27. Gelaye B, Rondon MB, Araya R, Williams MA. Epidemiology of maternal depression, risk factors, and child outcomes in low-income and middle-income countries. *Lancet Psychiatry*. 2016;3(10):973-982. doi:10.1016/S2215-0366(16)30284-X

- 1
  - 2
  - 3
  - 4
  - 5
  - 6
  - 7
  - 8
  - 9
  - 10
  - 11
  - 12
  - 13
  - 14
  - 15
  - 16
  - 17
  - 18
  - 19
  - 20
  - 21
  - 22
  - 23
  - 24
  - 25
  - 26
  - 27
  - 28
  - 29
  - 30
  - 31
  - 32
  - 33
  - 34
  - 35
  - 36
  - 37
  - 38
  - 39
  - 40
  - 41
  - 42
  - 43
  - 44
  - 45
  - 46
  - 47
  - 48
  - 49
  - 50
  - 51
  - 52
  - 53
  - 54
  - 55
  - 56
  - 57
  - 58
  - 59
  - 60
28. Filippi V, Chou D, Barreix M, Say L. A new conceptual framework for maternal morbidity. *Int J Gynecol Obstet*, 2018; 141: 4-9.
29. Say L, Chou D, Barbour K, Barreix M, Cecatti J, Costa M, et al. Maternal morbidity: time for reflection, recognition, and action. *Int J Gynecol Obstet*. 2018;141(S1):1–3.
30. McCauley M, Avais A, Agrawal R, Saleem S, Zafar S, van den Broek N. “Good health means being mentally, socially, emotionally and physically fit”: Women’s understanding of health and ill-health during and after pregnancy. *BMJ Open*. 2020;10:e028760. <https://doi.org/10.1136/bmjopen-2018-028760>.
31. Lange IL, Gherissi A, Chou D, Say L, Filippi V. What maternal morbidities are and what they mean for women: A thematic analysis of twenty years of qualitative research in low and lower-middle income countries. *PLoS One*. 2019;14(4):e0214199. Published 2019 Apr 11. <https://doi.org/10.1371/journal.pone.0214199>.

### List of tables and figures

**Figure 1:** Histogram of number and severity of symptoms reported, number of abnormal clinical examinations, number of abnormal investigations per stage per combined study population (n=11,454)

**Table 1:** Physical multi-morbidity (infectious, medical, obstetric) per assessment stage for all countries combined (n=11,454)

**Table 2:** Psychological and social co-morbidities of women per assessment stage for all countries combined (n= 11,454)

**Figure 2:** Percentage of women with infectious, medical/obstetric, psychological, and social morbidity per stage per combined study population (n= 11,454)

**Table 1:** Physical multi-morbidity (infectious, medical, obstetric) per assessment stage for all countries combined (n=11,454)

| Assessment stage                                             | First half of pregnancy | Second half of pregnancy | Within 24 hours of childbirth | Early postnatal | Late postnatal | Total         |
|--------------------------------------------------------------|-------------------------|--------------------------|-------------------------------|-----------------|----------------|---------------|
| Number of women <sup>a</sup>                                 | 2204                    | 2425                     | 2250                          | 2264            | 2311           | 11,454        |
|                                                              | n (%)                   | n (%)                    | n (%)                         | n (%)           | n (%)          | n (%)         |
| <b>INFECTIOUS MORBIDITY</b>                                  |                         |                          |                               |                 |                |               |
| HIV                                                          | 99 (4.5%)               | 107 (4.4%)               | 107 (4.8%)                    | 123 (5.4%)      | 116 (5.0%)     | 551 (4.8%)    |
| Malaria                                                      | 85 (3.9%)               | 73 (3.0%)                | 59 (2.6%)                     | 43 (1.9%)       | 49 (2.1%)      | 309 (2.7%)    |
| Syphilis                                                     | 36 (1.6%)               | 24 (1.0%)                | 19 (0.8%)                     | 16 (0.7%)       | 12 (0.5%)      | 107 (0.9%)    |
| Positive screening for chest infection/possible tuberculosis | 18 (0.8%)               | 24 (1.0%)                | 10 (0.4%)                     | 12 (0.5%)       | 10 (0.4%)      | 74 (0.6%)     |
| Septic Inflammatory Response Syndrome (SIRS) <sup>b</sup>    | 480 (21.8%)             | 609 (25.1%)              | 472 (21.0%)                   | 590 (26.1%)     | 492 (21.3%)    | 2,643 (23.1%) |
| <b>MEDICAL OR OBSTETRIC MORBIDITY</b>                        |                         |                          |                               |                 |                |               |
| Anaemia <sup>c</sup>                                         | 900 (40.8%)             | 1226 (50.6%)             | 1096 (48.7%)                  | 1213 (53.6%)    | 985 (42.6%)    | 5420 (47.3%)  |
| Severe anaemia                                               | 28 (1.3%)               | 47 (1.9%)                | 41 (1.8%)                     | 63 (2.8%)       | 23 (1.0%)      | 202 (1.8%)    |
| Body mass index ≤18.5 kg/m <sup>2</sup>                      | 66 (3.0%)               | 61 (2.5%)                | 34 (1.5%)                     | 68 (3.0%)       | 58 (2.5%)      | 287 (2.5%)    |
| Body mass index > 30kg/m <sup>2</sup>                        | 786 (35.6%)             | 1264 (50.2%)             | 912 (40.5%)                   | 665 (29.3%)     | 761 (32.9%)    | 4867 (42.5%)  |
| Hypertension                                                 | 33 (1.5%)               | 111 (4.6%)               | 82 (3.6%)                     | 66 (2.9%)       | 48 (2.1%)      | 340 (3.0%)    |
| Pre-eclampsia                                                | n/a                     | 51 (2.1%)                | 18 (0.8%)                     | 17 (0.7%)       | n/a            | 86 (1.2%)     |
| Urine incontinence                                           | 67 (3.0%)               | 161 (6.6%)               | 69 (3.1%)                     | 44 (1.9%)       | 76 (3.3%)      | 417 (3.6%)    |
| Antenatal haemorrhage                                        | 139 (6.3%)              | 74 (3.0%)                | n/a                           | n/a             | n/a            | 213(4.6%)     |
| <b>At least 1 medical or obstetric condition</b>             | 998 (45.3%)             | 1328 (54.8%)             | 1135 (50.4%)                  | 1245 (55.0%)    | 1017 (44.0%)   | 5723 (50.0%)  |

<sup>a</sup> Where data were missing for a condition the condition was regarded as being absent for purposes of deriving morbidities; % missing was: HIV 9.7%, malaria 5.3%, syphilis 8.9%, screening for chest infection/TB 2.0%, nutritional status 2.9%, anaemia 1.9%, blood pressure 2.3%, urine incontinence 0.5%.

1  
2  
3  
4  
5  
6  
7  
8  
9  
10  
11  
12  
13  
14  
15  
16  
17  
18  
19  
20  
21  
22  
23  
24  
25  
26  
27  
28  
29  
30  
31  
32  
33  
34  
35  
36  
37  
38  
39  
40  
41  
42  
43  
44  
45  
46  
47  
48  
49  
50  
51  
52  
53  
54  
55  
56  
57  
58  
59  
60

<sup>b</sup>CRP was not measured at some primary level facilities in Malawi and Pakistan. Only participants for whom a CRP result was obtained are included in these statistics.

<sup>c</sup>Anaemia is defined as Hb< 11.0g/dL and severe anaemia is defined as Hb<7.0g/dL

For peer review only

**Table 2:** Psychological and social co-morbidities of women per assessment stage for all countries combined (n= 11,454)

| Assessment stage                                                      | First half of pregnancy      | Second half of pregnancy | Within 24 hours of childbirth | Early postnatal | Late postnatal | Total        |              |
|-----------------------------------------------------------------------|------------------------------|--------------------------|-------------------------------|-----------------|----------------|--------------|--------------|
| Number of women*                                                      | 2204                         | 2425                     | 2250                          | 2264            | 2311           | 11,454       |              |
|                                                                       | n (%)                        | n (%)                    | n (%)                         | n (%)           | n (%)          | n (%)        |              |
| <b>PSYCHOLOGICAL MORBIDITY</b>                                        |                              |                          |                               |                 |                |              |              |
| <b>EDPS ≥ 10</b>                                                      | 494 (22.4%)                  | 641 (26.4%)              | 511 (22.7%)                   | 503 (22.2%)     | 469 (20.3%)    | 2618 (22.9%) |              |
| <b>Thoughts of self-harm</b>                                          | 246 (11.2%)                  | 426 (17.6%)              | 359 (16.0%)                   | 351 (15.5%)     | 362 (15.7%)    | 1744 (15.2%) |              |
| <b>EDPS ≥ 10 and/or thoughts of self-harm</b>                         | 542 (24.6%)                  | 721 (29.7%)              | 630 (28.0%)                   | 591 (26.1%)     | 575 (24.9%)    | 3059 (26.7%) |              |
| <b>SOCIAL MORBIDITY</b>                                               |                              |                          |                               |                 |                |              |              |
| <b>Domestic violence</b>                                              |                              |                          |                               |                 |                |              |              |
| <b>HITS score &gt;4</b>                                               | <b>Husband and/or family</b> | 657 (29.8%)              | 978 (40.3%)                   | 756 (33.6%)     | 770 (34.0%)    | 722 (31.2%)  | 3883 (33.9%) |
|                                                                       | <b>Husband</b>               | 475 (21.5%)              | 776 (32.0%)                   | 597 (26.5%)     | 602 (26.6%)    | 560 (24.2%)  | 3010 (26.3%) |
|                                                                       | <b>Family</b>                | 328 (14.9%)              | 444 (18.3%)                   | 358 (15.9%)     | 341 (15.1%)    | 334 (14.4%)  | 1805 (15.8%) |
| <b>HITS score &gt;10</b>                                              | <b>Husband and/or family</b> | 161 (7.3%)               | 276 (11.4%)                   | 172 (7.6%)      | 187 (8.3%)     | 170 (7.4%)   | 966 (8.4%)   |
|                                                                       | <b>Husband</b>               | 101 (4.6%)               | 223 (9.2%)                    | 109 (4.8%)      | 127 (5.6%)     | 121 (5.2%)   | 681 (6.0%)   |
|                                                                       | <b>Family</b>                | 74 (3.4%)                | 80 (3.3%)                     | 85 (3.8%)       | 79 (3.5%)      | 73 (3.2%)    | 391 (3.4%)   |
| <b>Substance misuse</b>                                               |                              |                          |                               |                 |                |              |              |
| <b>Use of alcohol, sedatives, inhalants, tobacco in last 3 months</b> | 135 (6.1%)                   | 112 (4.6%)               | 122 (5.4%)                    | 146 (6.5%)      | 157 (6.8%)     | 672 (5.9%)   |              |
| <b>Intervention required (ASSIST score &gt; 4)</b>                    | 38 (1.7%)                    | 38 (1.6%)                | 34 (1.5%)                     | 42 (1.9%)       | 20 (2.2%)      | 202 (1.8%)   |              |

ASSIST: Alcohol, Smoking and Substance Involvement Screening Test; EPDS: Edinburgh Postnatal Depression Scale; HITS: Hurt, Insulted, Threatened, Screamed at.

**Figure 1:** Histogram of number and severity of symptoms reported, number of abnormal clinical examinations, number of abnormal investigations per stage per combined study population (n=11,454)

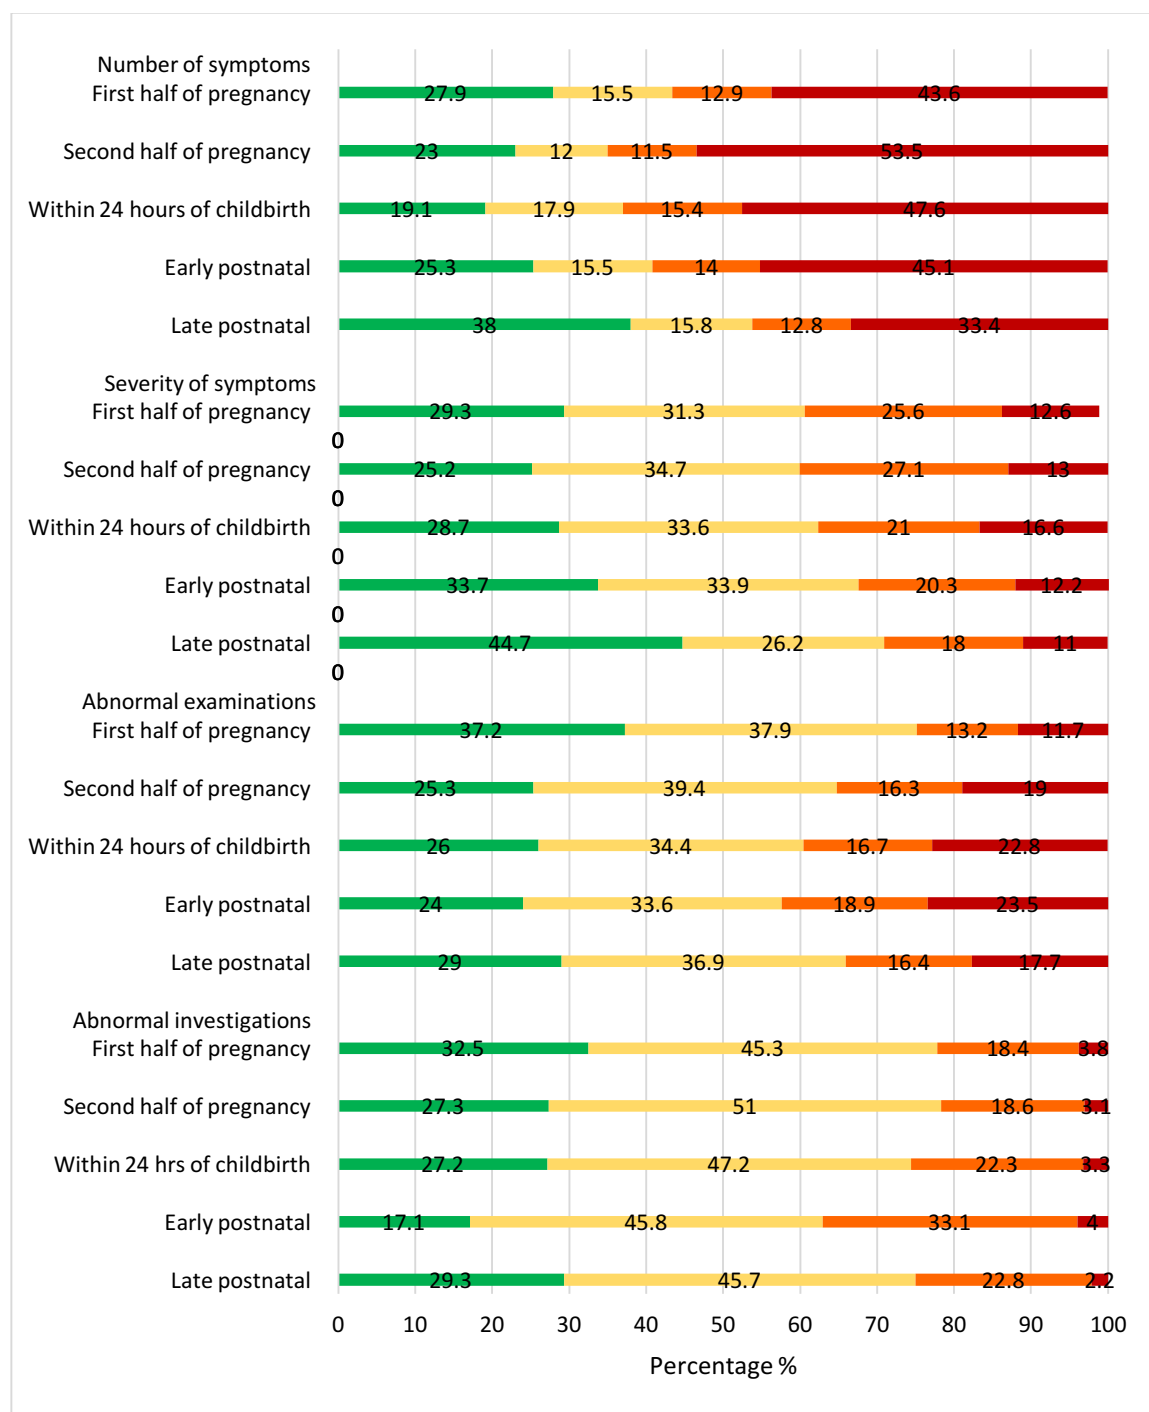

|    | Number of symptoms | Severity of symptoms | Number of abnormal examinations | Number of abnormal investigations |
|----|--------------------|----------------------|---------------------------------|-----------------------------------|
| 0  | 0                  | None, Not at all     | 0                               | 0                                 |
| 1  | 1                  | Slightly             | 1                               | 1                                 |
| 2  | 2                  | Moderately           | 2                               | 2                                 |
| ≥3 | ≥3                 | A lot                | ≥3                              | ≥3                                |

**Figure 2:** Percentage of women with infectious, medical/obstetric, psychological and social morbidity per stage per combined study population (n=11,454)

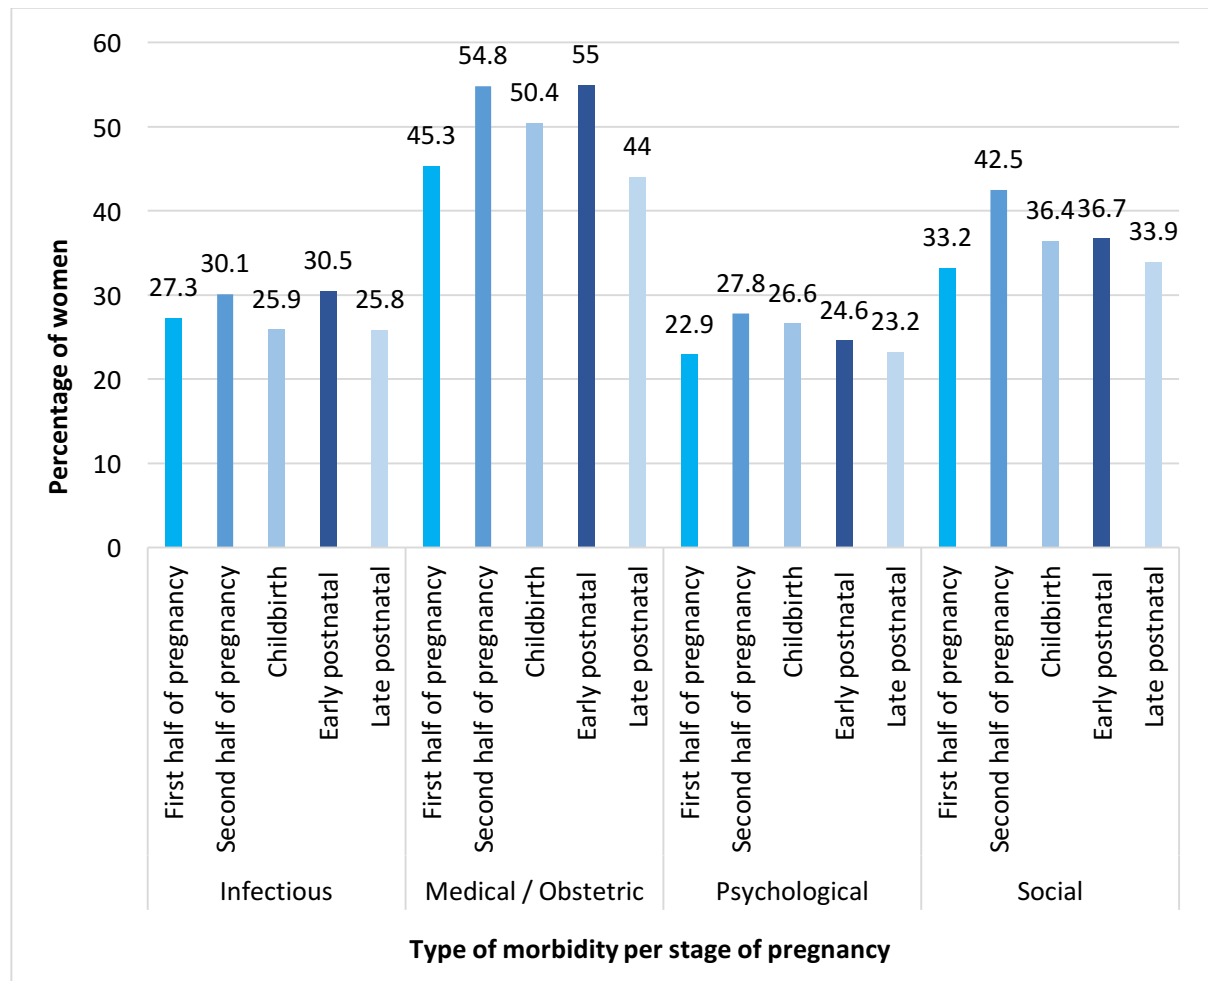

Only



## SUPPLEMENTARY TABLES

**Supplementary Table 1:** Number of women per country, per assessment stage and per healthcare facility level (n=11,454)

**Supplementary Table 2:** Infectious, medical, and obstetric morbidity identified per assessment stage for women living in India (n=2,099)

**Supplementary Table 3:** Infectious, medical, and obstetric morbidity identified per assessment stage for women living in Pakistan (n=3,287)

**Supplementary Table 4:** Infectious, medical, and obstetric morbidity identified per assessment stage for women living in Kenya (n=3,145)

**Supplementary Table 5:** Infectious, medical, and obstetric morbidity identified per assessment stage for women living in Malawi (n=2,923)

**Supplementary Table 6:** Psychological and social morbidity per assessment stage for women living in India (n=2,099)

**Supplementary Table 7:** Psychological and social morbidity of women per assessment stage for women living in for all countries combined for Pakistan (n= 3,287)

**Supplementary Table 8:** Psychological and social morbidity per assessment stage for women living in Kenya (n=3,145)

**Supplementary Table 9:** Psychological and social morbidity per assessment stage for women living in Malawi (n= 2,923)

**Supplementary Table 1:** Socio-demographic and obstetric characteristics of women by stage and for all stages combined (n=11,454)

| Assessment stage                  | First half of pregnancy | Second half of pregnancy | Within 24 hours of childbirth | Early postnatal | Late postnatal | Total  | P value |
|-----------------------------------|-------------------------|--------------------------|-------------------------------|-----------------|----------------|--------|---------|
| Number of women                   | 2,204                   | 2,425                    | 2,250                         | 2,264           | 2,311          | 11,454 |         |
|                                   | %                       | %                        | %                             | %               | %              | %      |         |
| <b>Age category (years)</b>       |                         |                          |                               |                 |                |        |         |
| <20                               | 11.0                    | 9.4                      | 11.2                          | 11.3            | 11.3           | 10.8   | 0.007   |
| 20-24                             | 28.8                    | 26.8                     | 30.6                          | 31.7            | 28.1           | 29.2   |         |
| 25-29                             | 30.7                    | 29.2                     | 29.4                          | 29.8            | 30.9           | 30.0   |         |
| 30-34                             | 15.7                    | 17.8                     | 16.4                          | 15.1            | 16.4           | 16.3   |         |
| ≥35                               | 8.0                     | 8.7                      | 6.6                           | 7.0             | 7.2            | 7.5    |         |
| <b>Parity</b>                     |                         |                          |                               |                 |                |        |         |
| 0 or 1                            | 34.8                    | 30.3                     | 35.7                          | 38.6            | 35.0           | 34.8   | <0.001  |
| 2-4                               | 54.7                    | 56.9                     | 50.8                          | 51.1            | 55.6           | 53.8   |         |
| ≥5                                | 5.9                     | 8.5                      | 6.1                           | 5.7             | 5.8            | 6.4    |         |
| <b>Marital status</b>             |                         |                          |                               |                 |                |        |         |
| Single                            | 6.2                     | 6.1                      | 4.9                           | 5.7             | 4.5            | 5.5    | 0.16    |
| Married                           | 92.7                    | 92.5                     | 94.1                          | 93.3            | 93.7           | 93.3   |         |
| <b>Socioeconomic status (SES)</b> |                         |                          |                               |                 |                |        |         |
| 1st quintile (upper)              | 13.7                    | 10.4                     | 10.8                          | 11.2            | 11.2           | 11.4   | <0.001  |
| 2nd quintile                      | 16.5                    | 15.8                     | 15.4                          | 17.4            | 16.7           | 16.3   |         |
| 3rd quintile                      | 31.0                    | 28.8                     | 30.1                          | 28.5            | 31.8           | 30.0   |         |
| 4th quintile                      | 27.5                    | 28.7                     | 29.4                          | 29.3            | 27.4           | 28.4   |         |
| 5th quintile (lower)              | 8.7                     | 12.1                     | 11.7                          | 10.6            | 10.3           | 10.7   |         |
| <b>Education level completed</b>  |                         |                          |                               |                 |                |        |         |
| None                              | 17.2                    | 18.0                     | 20.4                          | 20.9            | 19.3           | 19.2   | <0.001  |
| Primary                           | 33.1                    | 34.0                     | 35.9                          | 34.1            | 34.0           | 34.2   |         |
| Secondary                         | 30.0                    | 26.6                     | 25.7                          | 28.1            | 26.7           | 27.4   |         |
| Post-secondary                    | 15.9                    | 15.6                     | 13.1                          | 13.7            | 15.5           | 14.8   |         |

**Supplementary Table 2: Infectious, medical, and obstetric morbidity identified per assessment stage for women living in India (n=2,099)**

| Assessment stage                                          | First half of pregnancy | Second half of pregnancy | Within 24 hours of childbirth | Early postnatal    | Late postnatal     | Total               |
|-----------------------------------------------------------|-------------------------|--------------------------|-------------------------------|--------------------|--------------------|---------------------|
| Number of women <sup>a*</sup>                             | 416                     | 397                      | 423                           | 432                | 431                | 2099                |
|                                                           | n (%)                   | n (%)                    | n (%)                         | n (%)              | n (%)              | n (%)               |
| <b>INFECTIOUS MORBIDITY</b>                               |                         |                          |                               |                    |                    |                     |
| <b>Condition</b>                                          |                         |                          |                               |                    |                    |                     |
| HIV                                                       | 2 (0.5%)                | 2 (0.5%)                 | 1 (0.2%)                      | 1 (0.2%)           | 0                  | 6 (0.3%)            |
| Malaria                                                   | 0                       | 0                        | 0                             | 0                  | 2 (0.5%)           | 2 (0.1%)            |
| Syphilis                                                  | 0                       | 0                        | 0                             | 0                  | 0                  | 0                   |
| Positive screening for chest infection/possible TB        | 2 (0.5%)                | 1 (0.2%)                 | 1 (0.2%)                      | 2 (0.5%)           | 2 (0.5%)           | 8 (0.4%)            |
| Septic Inflammatory Response Syndrome (SIRS) <sup>b</sup> | 43 (10.3%)              | 66 (16.6%)               | 47 (11.1%)                    | 63 (14.6%)         | 70 (16.2%)         | 289 (13.8%)         |
| <b>MEDICAL OR OBSTETRIC MORBIDITY</b>                     |                         |                          |                               |                    |                    |                     |
| <b>Condition</b>                                          |                         |                          |                               |                    |                    |                     |
| Anaemia <sup>c</sup>                                      | 184 (44.2%)             | 228 (57.4%)              | 282 (66.7%)                   | 309 (71.5%)        | 265 (61.5%)        | 1268 (60.4%)        |
| Severe anaemia                                            | 4 (1.0%)                | 13 (3.3%)                | 12 (2.8%)                     | 17 (3.9%)          | 5 (1.2%)           | 51 (2.4%)           |
| Hypertension                                              | 2 (0.5%)                | 16 (4.0%)                | 7(1.6%)                       | 7 (1.6%)           | 1 (0.2%)           | 33 (1.6%)           |
| Low BMI (<18.5 kg/m <sup>2</sup> )                        | 30 (7.4%)               | 9 (2.3%)                 | 9 (2.1%)                      | 9 (2.1%)           | 10 (2.3%)          | 67 (3.2%)           |
| High BMI (> 30kg/m <sup>2</sup> )                         | 55 (13.6%)              | 153 (38.9%)              | 109 (26.0%)                   | 97 (22.5%)         | 107 (25%)          | 521 (25.1)          |
| Pre-eclampsia                                             | n/a                     | 0                        | 0                             | 1 (0.2%)           | n/a                | 1 (0.1%)            |
| Urine incontinence                                        | 13 (3.1%)               | 21 (5.3%)                | 0                             | 2 (0.5%)           | 0                  | 36 (1.7%)           |
| Antenatal haemorrhage                                     | 0                       | 0                        | n/a                           | n/a                | n/a                | 0                   |
| <b>At least 1 medical or obstetric condition</b>          | <b>202 (48.6%)</b>      | <b>254 (64.0%)</b>       | <b>285 (67.4%)</b>            | <b>311 (72.0%)</b> | <b>266 (61.7%)</b> | <b>1318 (62.8%)</b> |

<sup>a</sup> Where data were missing for a condition the condition was regarded as being absent for purposes of deriving morbidities

<sup>b</sup> CRP was not measured at some primary level facilities in Malawi and Pakistan. Only participants for whom a CRP result was obtained are included in these statistics.

<sup>c</sup> Anaemia is defined as Hb< 11.0g/dL and severe anaemia is defined as Hb<7g/dL

**Supplementary Table 3: Infectious, medical, and obstetric morbidity identified per assessment stage for women living in Pakistan (n=3,287)**

| Assessment stage                                          | First half of pregnancy | Second half of pregnancy | Within 24 hours of childbirth | Early postnatal    | Late postnatal     | Total               |
|-----------------------------------------------------------|-------------------------|--------------------------|-------------------------------|--------------------|--------------------|---------------------|
| Number of women <sup>a*</sup>                             | 607                     | 768                      | 654                           | 618                | 640                | 3287                |
|                                                           | n (%)                   | n (%)                    | n (%)                         | n (%)              | n (%)              | n (%)               |
| <b>INFECTIOUS MORBIDITY</b>                               |                         |                          |                               |                    |                    |                     |
| <b>Condition</b>                                          |                         |                          |                               |                    |                    |                     |
| HIV                                                       | 0                       | 1 (0.1%)                 | 7 (1.1%)                      | 2 (0.3%)           | 1 (0.2%)           | 11 (0.3%)           |
| Malaria                                                   | 0                       | 0                        | 0                             | 1 (0.2%)           | 0                  | 1 (0.03%)           |
| Syphilis                                                  | 0                       | 0                        | 0                             | 0                  | 0                  | 0                   |
| Positive screening for chest infection/possible TB        | 7 (1.1%)                | 11 (1.4%)                | 2 (0.3%)                      | 2 (0.3%)           | 3 (0.5%)           | 25 (0.8%)           |
| Septic Inflammatory Response Syndrome (SIRS) <sup>b</sup> | 67 (11.0%)              | 122 (15.9%)              | 54 (8.3%)                     | 70 (11.3%)         | 55 (8.6%)          | 368 (11.2%)         |
| <b>MEDICAL OR OBSTETRIC MORBIDITY</b>                     |                         |                          |                               |                    |                    |                     |
| <b>Condition</b>                                          |                         |                          |                               |                    |                    |                     |
| Anaemia <sup>c</sup>                                      | 389 (64.1%)             | 590 (76.8%)              | 435 (66.5%)                   | 437 (70.7%)        | 375 (58.6%)        | 2226 (67.7%)        |
| Severe anaemia                                            | 9 (1.5%)                | 27 (3.5%)                | 18 (2.8%)                     | 22 (3.6%)          | 5 (0.8%)           | 81 (2.5%)           |
| Body mass index ≤18.5 kg/m <sup>2</sup>                   | 37 (6.2%)               | 16(2.2%)                 | 7(1.1%)                       | 11 (1.8%)          | 10 (1.6%)          | 81 (2.5%)           |
| High BMI (> 30kg/m <sup>2</sup> )                         | 289 (48.5%)             | 470 (63.2%)              | 306 (48.6%)                   | 325 (53.7%)        | 307 (49.8%)        | 1697 (53.2%)        |
| Hypertension                                              | 18 (3.0%)               | 67 (8.7%)                | 54 (8.3%)                     | 40 (6.5%)          | 27 (4.2%)          | 206 (6.3%)          |
| Pre-eclampsia                                             | n/a                     | 26 (3.4%)                | 8 (1.2%)                      | 6 (1.0%)           | n/a                | 40 (2.0%)           |
| Urine incontinence                                        | 40 (6.6%)               | 106 (13.8%)              | 64 (9.8%)                     | 39 (6.3%)          | 65 (10.2%)         | 314 (9.5%)          |
| Antenatal haemorrhage                                     | 80 (13.2%)              | 60 (7.8%)                | n/a                           | n/a                | n/a                | 140 (10.2%)         |
| <b>At least 1 medical or obstetric condition</b>          | <b>422 (69.5%)</b>      | <b>619 (80.6%)</b>       | <b>455 (69.6%)</b>            | <b>455 (73.6%)</b> | <b>388 (60.6%)</b> | <b>2339 (71.2%)</b> |

<sup>a</sup> Where data were missing for a condition the condition was regarded as being absent for purposes of deriving morbidities

<sup>b</sup> CRP was not measured at some primary level facilities in Malawi and Pakistan. Only participants for whom a CRP result was obtained are included in these statistics.

<sup>c</sup> Anaemia is defined as Hb< 11.0g/dL and severe anaemia is defined as Hb<7g/dL

**Supplementary Table 4: Infectious, medical, and obstetric morbidity identified per assessment stage for women living in Kenya (n=3,145)**

| Assessment stage | First half of pregnancy | Second half of pregnancy | Within 24 hours of childbirth | Early postnatal | Late postnatal | Total |
|------------------|-------------------------|--------------------------|-------------------------------|-----------------|----------------|-------|
|------------------|-------------------------|--------------------------|-------------------------------|-----------------|----------------|-------|

|                                                           |                    |                    |                    |                    |                    |                    |
|-----------------------------------------------------------|--------------------|--------------------|--------------------|--------------------|--------------------|--------------------|
| Number of women <sup>a*</sup>                             | 592                | 684                | 592                | 620                | 657                | 3145               |
|                                                           | <b>n (%)</b>       | <b>n (%)</b>       | <b>n (%)</b>       | <b>n (%)</b>       | <b>n (%)</b>       | <b>n (%)</b>       |
| <b>INFECTIOUS MORBIDITY</b>                               |                    |                    |                    |                    |                    |                    |
| <b>Condition</b>                                          |                    |                    |                    |                    |                    |                    |
| HIV                                                       | 24 (4.0%)          | 19 (2.8%)          | 24 (4.0%)          | 25 (4.0%)          | 25 (3.8%)          | 117 (3.7%)         |
| Malaria                                                   | 2 (0.3%)           | 2 (0.3%)           | 1 (0.2%)           | 2 (0.3%)           | 0                  | 7 (0.2%)           |
| Syphilis                                                  | 2 (0.3%)           | 2 (0.3%)           | 1 (0.2%)           | 0                  | 3 (0.5%)           | 8 (0.2%)           |
| Positive screening for chest infection/ possible TB       | 3 (0.5%)           | 6 (0.9%)           | 5 (0.8%)           | 3 (0.5%)           | 5 (0.8%)           | 22 (0.7%)          |
| Septic Inflammatory Response Syndrome (SIRS) <sup>b</sup> | 206 (34.8%)        | 267 (39.0%)        | 197 (33.3%)        | 278 (44.8%)        | 199 (30.3%)        | 1147 (36.5%)       |
| <b>MEDICAL OR OBSTETRIC MORBIDITY</b>                     |                    |                    |                    |                    |                    |                    |
| <b>Condition</b>                                          |                    |                    |                    |                    |                    |                    |
| Anaemia <sup>c</sup>                                      | 102 (17.2%)        | 163 (23.8%)        | 146 (24.7%)        | 204 (32.9%)        | 130 (19.8%)        | 745 (23.7%)        |
| Severe anaemia                                            | 7 (1.2%)           | 4 (0.6%)           | 7 (1.2%)           | 12 (1.9%)          | 12 (1.8%)          | 65 (2.1%)          |
| Body mass index $\leq 18.5$ kg/m <sup>2</sup>             | 18 (3.1%)          | 8 (1.2%)           | 10 (1.7%)          | 7 (1.2%)           | 3 (0.5%)           | 46 (1.5%)          |
| High BMI (> 30kg/m <sup>2</sup> )                         | 278 (47.7%)        | 404 (59.8%)        | 328 (56.2%)        | 350 (57.6%)        | 325 (50.3%)        | 1685 (54.4%)       |
| Hypertension                                              | 7 (1.2%)           | 19 (2.8%)          | 13 (2.2%)          | 16 (2.6%)          | 15 (2.3%)          | 70 (2.2%)          |
| Pre-eclampsia                                             | n/a                | 8 (1.2%)           | 0                  | 4 (0.6%)           | n/a                | 12 (0.6%)          |
| Urine incontinence                                        | 12 (2.0%)          | 23 (3.4%)          | 2 (0.3%)           | 3 (0.5%)           | 9 (1.4%)           | 49 (1.6%)          |
| Antenatal haemorrhage                                     | 54 (9.1%)          | 12 (1.7%)          | n/a                | n/a                | n/a                | 66 (5.2%)          |
| <b>At least 1 medical or obstetric condition</b>          | <b>142 (24.0%)</b> | <b>197 (28.8%)</b> | <b>156 (26.3%)</b> | <b>214 (34.5%)</b> | <b>143 (21.8%)</b> | <b>852 (27.1%)</b> |

<sup>a</sup> Where data were missing for a condition the condition was regarded as being absent for purposes of deriving morbidities

<sup>b</sup> CRP was not measured at some primary level facilities in Malawi and Pakistan. Only participants for whom a CRP result was obtained are included in these statistics.

<sup>c</sup> Anaemia is defined as Hb < 11.0g/dL and severe anaemia is defined as Hb < 7g/dL

**Supplementary Table 5: Infectious, medical, and obstetric morbidity identified per assessment stage for women living in Malawi (n=2923)**

| Assessment stage                                          | First half of pregnancy | Second half of pregnancy | Within 24 hours of childbirth | Early postnatal    | Late postnatal     | Total               |
|-----------------------------------------------------------|-------------------------|--------------------------|-------------------------------|--------------------|--------------------|---------------------|
| Number of women <sup>a</sup>                              | 589                     | 576                      | 581                           | 594                | 583                | 2923                |
|                                                           | n (%)                   | n (%)                    | n (%)                         | n (%)              | n (%)              | n (%)               |
| <b>INFECTIOUS MORBIDITY</b>                               |                         |                          |                               |                    |                    |                     |
| HIV                                                       | 73 (12.4%)              | 85 (14.8%)               | 75 (12.9%)                    | 95(16.0%)          | 90(15.4%)          | 418 (14.3%)         |
| Malaria                                                   | 83 (14.1%)              | 71 (12.3%)               | 58 (10.0%)                    | 40 (6.7%)          | 47 (8.1%)          | 299 (10.2%)         |
| Syphilis                                                  | 34 (5.8%)               | 22 (3.8%)                | 18 (3.1%)                     | 16 (2.7%)          | 9 (1.5%)           | 99 (3.4%)           |
| Positive screening for chest infection/ possible TB       | 6 (1.0%)                | 6 (1.0%)                 | 2 (0.3%)                      | 5 (0.8%)           | 0                  | 19 (0.7%)           |
| Septic Inflammatory Response Syndrome (SIRS) <sup>b</sup> | 164 (27.8%)             | 154 26.7(%)              | 174 (30.0%)                   | 179 (30.1%)        | 168 (28.8%)        | 839 (28.7%)         |
| <b>MEDICAL OR OBSTETRIC MORBIDITY</b>                     |                         |                          |                               |                    |                    |                     |
| Anaemia <sup>c</sup>                                      | 225 (38.2%)             | 245 (42.5%)              | 233 (40.1%)                   | 263 (44.3%)        | 215 (36.9%)        | 1181 (40.4%)        |
| Severe anaemia                                            | 8 (1.4%)                | 3 (0.5%)                 | 4 (0.7%)                      | 12 (2.0%)          | 6 (1.0%)           | 33 (1.1%)           |
| Body mass index ≤18.5 kg/m <sup>2</sup>                   | 18 (3.1%)               | 7 (1.2%)                 | 19 (3.3%)                     | 22 (3.7%)          | 22 (3.8%)          | 88 (3.0%)           |
| High BMI (> 30kg/m <sup>2</sup> )                         | 164 (28.3%)             | 237 (41.6%)              | 169 (29.2%)                   | 186 (31.5%)        | 208 (36.1%)        | 964 (33.3%)         |
| Hypertension                                              | 6 (1.0%)                | 9 (1.6%)                 | 8 (1.4%)                      | 3 (0.5%)           | 5(0.9%)            | 31 (1.1%)           |
| Pre-eclampsia                                             | n/a                     | 17 (2.9%)                | 10 (1.7%)                     | 6 (1.0%)           | n/a                | 49 (2.8%)           |
| Urine incontinence                                        | 2 (0.3%)                | 11 (1.9%)                | 3 (0.5%)                      | 0                  | 2 (0.3%)           | 18 (0.6%)           |
| Antenatal haemorrhage                                     | 5 (0.9%)                | 2 (0.4%)                 | n/a                           | n/a                | n/a                | 7 (0.6%)            |
| <b>At least one medical or obstetric condition</b>        | <b>232 (39.4%)</b>      | <b>258 (44.8%)</b>       | <b>239 (41.1%)</b>            | <b>265 (44.6%)</b> | <b>220 (37.7%)</b> | <b>1214 (41.5%)</b> |

<sup>a</sup> Where data were missing for a condition the condition was regarded as being absent for purposes of deriving morbidities

<sup>b</sup> CRP was not measured at some primary level facilities in Malawi and Pakistan. Only participants for whom a CRP result was obtained are included in these statistics.

<sup>c</sup> Anaemia is defined as Hb< 11.0g/dL and severe anaemia is defined as Hb<7g/dL

**Supplementary Table 6: Psychological and social morbidity per assessment stage for women living in India (number of women assessed n=2099)**

| stage                                                                    | First half of pregnancy | Second half of pregnancy | Within 24 hours of childbirth | Early postnatal | Late postnatal | Total       |             |
|--------------------------------------------------------------------------|-------------------------|--------------------------|-------------------------------|-----------------|----------------|-------------|-------------|
| Number of women*                                                         | 416                     | 397                      | 423                           | 432             | 431            | 2099        |             |
|                                                                          | n %                     | n %                      | n %                           | n %             | n %            | n %         |             |
| <b>PSYCHOLOGICAL MORBIDITY</b>                                           |                         |                          |                               |                 |                |             |             |
| <b>EDPS ≥ 10</b>                                                         | 45 (10.8%)              | 103 (25.9%)              | 86 (20.3%)                    | 86 (19.9%)      | 84 (19.5%)     | 404 (19.2%) |             |
| <b>Thoughts of self-harm</b>                                             | 40 (9.6%)               | 79 (19.9%)               | 72 (17.0%)                    | 71 (16.4%)      | 66 (15.3%)     | 328 (15.6%) |             |
| <b>EDPS ≥ 10 and/or thoughts of self-harm</b>                            | 60 (14.4%)              | 116 (29.2%)              | 102 (24.1%)                   | 99 (22.9%)      | 95 (22.0%)     | 472 (22.5%) |             |
| <b>SOCIAL MORBIDITY</b>                                                  |                         |                          |                               |                 |                |             |             |
| <b>Domestic violence</b>                                                 |                         |                          |                               |                 |                |             |             |
| <b>HITS score &gt;4</b>                                                  | Husband and/or family   | 159 (38.2%)              | 173 (43.6%)                   | 153 (36.2%)     | 189 (43.7%)    | 159 (36.9%) | 833 (39.7%) |
|                                                                          | Husband                 | 154 (37.0%)              | 164 (41.3%)                   | 152 (35.9%)     | 185 (42.8%)    | 155 (36.0%) | 810 (38.6%) |
|                                                                          | Family                  | 35 (8.4%)                | 67 (16.9%)                    | 28 (6.6%)       | 52 (12.0%)     | 29 (6.7%)   | 211 (10.0%) |
| <b>HITS score &gt;10</b>                                                 | Husband and/or family   | 23 (5.5%)                | 36 (9.1%)                     | 18 (4.3%)       | 33 (7.6%)      | 17 (3.9%)   | 127 (6.0%)  |
|                                                                          | Husband                 | 19 (4.6%)                | 27 (6.8%)                     | 16 (3.8%)       | 30 (6.9%)      | 15 (3.5%)   | 107 (5.1%)  |
|                                                                          | Family                  | 8 (1.9%)                 | 22 (5.5%)                     | 3 (0.7%)        | 15 (3.5%)      | 8 (1.9%)    | 56 (2.7%)   |
| <b>Substance misuse</b>                                                  |                         |                          |                               |                 |                |             |             |
| <b>Use of alcohol, sedatives, inhalants, or tobacco in last 3 months</b> | 6 (1.4%)                | 9 (2.3%)                 | 4 (0.9%)                      | 12 (2.8%)       | 5 (1.2%)       | 36 (1.7%)   |             |
| <b>Intervention required</b>                                             | 4 (1.0%)                | 7 (1.8%)                 | 0                             | 5 (1.2%)        | 1 (0.2%)       | 17 (0.8%)   |             |

ASSIST: Alcohol, Smoking and Substance Involvement Screening Test; EPDS: Edinburgh Postnatal Depression Scale; HITS: Hurt, Insulted, Threatened, Screamed at.

**Supplementary Table 7: Psychological and social morbidity of women per assessment stage for women living in for all countries combined for Pakistan (number of women assessed n= 3287)**

| stage                                                                    | First half of pregnancy | Second half of pregnancy | Within 24 hours of childbirth | Early postnatal | Late postnatal | Total           |                 |
|--------------------------------------------------------------------------|-------------------------|--------------------------|-------------------------------|-----------------|----------------|-----------------|-----------------|
| Number of women*                                                         | 607                     | 768                      | 654                           | 618             | 640            | 3287            |                 |
|                                                                          | n %                     | n %                      | n %                           | n %             | n %            | n %             |                 |
| <b>PSYCHOLOGICAL MORBIDITY</b>                                           |                         |                          |                               |                 |                |                 |                 |
| <b>EDPS ≥ 10</b>                                                         | 277<br>(45.6%)          | 349<br>(45.4%)           | 243<br>(37.2%)                | 256<br>(41.4%)  | 243<br>(38.0%) | 1368<br>(41.6%) |                 |
| <b>Thoughts of self-harm</b>                                             | 130<br>(21.4%)          | 242<br>(31.5%)           | 194<br>(29.7%)                | 200<br>(32.4%)  | 212<br>(33.1%) | 978<br>(29.7%)  |                 |
| <b>EDPS ≥ 10 and/or thoughts of self-harm</b>                            | 297<br>(48.9%)          | 379<br>(49.3%)           | 323<br>(49.4%)                | 308<br>(49.8%)  | 315<br>(49.2%) | 1622<br>(49.3%) |                 |
| <b>SOCIAL MORBIDITY</b>                                                  |                         |                          |                               |                 |                |                 |                 |
| <b>Domestic violence</b>                                                 |                         |                          |                               |                 |                |                 |                 |
| <b>HITS score &gt;4</b>                                                  | Husband and/or family   | 308<br>(50.7%)           | 464<br>(60.4%)                | 371<br>(56.7%)  | 382<br>(61.8%) | 314<br>(49.1%)  | 1839<br>(55.9%) |
|                                                                          | Husband                 | 183<br>(30.1%)           | 340<br>(44.3%)                | 255<br>(39.0%)  | 255<br>(41.3%) | 195<br>(30.5%)  | 1228<br>(37.4%) |
|                                                                          | Family                  | 197<br>(32.4%)           | 246<br>(32.0%)                | 217<br>(33.2%)  | 199<br>(32.2%) | 184<br>(28.7%)  | 1043<br>(31.7%) |
| <b>HITS score &gt;10</b>                                                 | Husband and/or family   | 109<br>(18.0%)           | 185<br>(24.1%)                | 103<br>(15.7%)  | 115<br>(18.6%) | 104<br>(16.2%)  | 616<br>(18.7%)  |
|                                                                          | Husband                 | 64 (10.5%)               | 150<br>(19.5%)                | 59 (9.0%)       | 70 (11.3%)     | 68<br>(10.6%)   | 411<br>(12.5%)  |
|                                                                          | Family                  | 50 (8.2%)                | 47 (6.1%)                     | 55 (8.4%)       | 47 (7.6%)      | 47 (7.3%)       | 246<br>(7.5%)   |
| <b>Substance misuse</b>                                                  |                         |                          |                               |                 |                |                 |                 |
| <b>Use of alcohol, sedatives, inhalants, or tobacco in last 3 months</b> | 61 (10.0%)              | 53 (6.9%)                | 45 (6.9%)                     | 74 (12.0%)      | 60 (9.4%)      | 293<br>(8.9%)   |                 |
| <b>Intervention required</b>                                             | 7 (1.1%)                | 13 (1.7%)                | 5 (0.8%)                      | 12 (1.9%)       | 20 (3.1%)      | 57 (1.7%)       |                 |

ASSIST: Alcohol, Smoking and Substance Involvement Screening Test; EPDS: Edinburgh Postnatal Depression Scale; HITS: Hurt, Insulted, Threatened, Screamed at.



**Supplementary Table 8: Psychological and social morbidity per assessment stage for women living in Kenya (n=3145)**

| Assessment stage                                                         | First half of pregnancy | Second half of pregnancy | Within 24 hours of childbirth | Early postnatal | Late postnatal | Total              |             |
|--------------------------------------------------------------------------|-------------------------|--------------------------|-------------------------------|-----------------|----------------|--------------------|-------------|
| Number of women*                                                         | 592                     | 684                      | 592                           | 620             | 657            | 3145               |             |
|                                                                          | n %                     | n %                      | n %                           | n %             | n %            | n %                |             |
| <b>PSYCHOLOGICAL MORBIDITY</b>                                           |                         |                          |                               |                 |                |                    |             |
| <b>EDPS ≥ 10</b>                                                         | 86 (14.5%)              | 101 (14.8%)              | 81 (13.7%)                    | 72 (11.6%)      | 49 (7.5%)      | 389 (12.4%)        |             |
| <b>Thoughts of self-harm</b>                                             | 28 (4.7%)               | 47 (6.9%)                | 29 (4.9%)                     | 20 (3.2%)       | 19 (2.9%)      | 143 (4.5%)         |             |
| <b>EDPS ≥ 10 and/or thoughts of self-harm</b>                            | 94 (15.9%)              | 126 (18.4%)              | 95 (16.0%)                    | 84 (13.5%)      | 60 (9.1%)      | <b>459 (14.6%)</b> |             |
| <b>SOCIAL MORBIDITY</b>                                                  |                         |                          |                               |                 |                |                    |             |
| <b>Domestic violence</b>                                                 |                         |                          |                               |                 |                |                    |             |
| <b>HITS score &gt;4</b>                                                  | Husband and/or family   | 99 (16.7%)               | 201 (29.4%)                   | 130 (22.0%)     | 105 (17.0%)    | 144 (21.9%)        | 679 (21.6%) |
|                                                                          | Husband                 | 78 (13.2%)               | 176 (25.7%)                   | 108 (18.2%)     | 88 (14.2%)     | 125 (19.0%)        | 575 (18.3%) |
|                                                                          | Family                  | 29 (4.9%)                | 51 (7.5%)                     | 35 (5.9%)       | 24 (3.9%)      | 47 (7.1%)          | 186 (5.9%)  |
| <b>HITS score &gt;10</b>                                                 | Husband and/or family   | 9 (1.5%)                 | 26 (3.8%)                     | 22 (3.7%)       | 12 (1.9%)      | 17 (2.6%)          | 86 (2.7%)   |
|                                                                          | Husband                 | 8 (1.3%)                 | 24 (3.5%)                     | 18 (3.0%)       | 10 (1.6%)      | 15 (2.3%)          | 75 (2.4%)   |
|                                                                          | Family                  | 2 (0.3%)                 | 2 (0.3%)                      | 6 (1.0%)        | 2 (0.3%)       | 2 (0.3%)           | 14 (0.4%)   |
| <b>Substance misuse</b>                                                  |                         |                          |                               |                 |                |                    |             |
| <b>Use of alcohol, sedatives, inhalants, or tobacco in last 3 months</b> | 40 (6.8%)               | 27 (3.9%)                | 42 (7.1%)                     | 37 (6.0%)       | 63 (9.6%)      | 209 (6.6%)         |             |
| <b>Intervention required</b>                                             | 9 (1.5%)                | 6 (0.9%)                 | 9 (1.5%)                      | 8 (1.3%)        | 14 (2.1%)      | 46 (1.5%)          |             |

ASSIST: Alcohol, Smoking and Substance Involvement Screening Test; EPDS: Edinburgh Postnatal Depression Scale; HITS: Hurt, Insulted, Threatened, Screamed at.

**Supplementary Table 9: Psychological and social morbidity per assessment stage for women living in Malawi (number of women assessed n= 2923)**

| Assessment stage                                                         | First half of pregnancy | Second half of pregnancy | Within 24 hours of childbirth | Early postnatal | Late postnatal | Total       |             |
|--------------------------------------------------------------------------|-------------------------|--------------------------|-------------------------------|-----------------|----------------|-------------|-------------|
| Number of women*                                                         | 589                     | 576                      | 581                           | 594             | 583            | 2923        |             |
|                                                                          | n %                     | n %                      | n %                           | n %             | n %            | n %         |             |
| <b>PSYCHOLOGICAL MORBIDITY</b>                                           |                         |                          |                               |                 |                |             |             |
| <b>EDPS ≥ 10</b>                                                         | 86 (14.6%)              | 88 (15.3%)               | 101 (17.4%)                   | 89 (15.0%)      | 93 (15.9%)     | 457 (15.6%) |             |
| <b>Thoughts of self-harm</b>                                             | 48 (8.2%)               | 58 (10.1%)               | 64 (11.0%)                    | 60 (10.1%)      | 65 (11.1%)     | 295 (10.1%) |             |
| <b>EDPS ≥ 10 and/or thoughts of self-harm</b>                            | 91 (15.4%)              | 100 (17.4%)              | 110 (18.9%)                   | 100 (16.8%)     | 105 (18.0%)    | 506 (17.3%) |             |
| <b>SOCIAL MORBIDITY</b>                                                  |                         |                          |                               |                 |                |             |             |
| <b>Domestic violence</b>                                                 |                         |                          |                               |                 |                |             |             |
| <b>HITS score &gt;4</b>                                                  | Husband and/or family   | 91 (15.4%)               | 140 (24.3%)                   | 102 (17.6%)     | 94 (15.8%)     | 105 (18.0%) | 532 (18.2%) |
|                                                                          | Husband                 | 60 (10.2%)               | 96 (16.7%)                    | 82 (14.1%)      | 74 (12.5%)     | 85 (14.6%)  | 397 (13.6%) |
|                                                                          | Family                  | 67 (11.4%)               | 80 (13.9%)                    | 78 (13.4%)      | 66 (11.1%)     | 74 (12.7%)  | 365 (12.5%) |
| <b>HITS score &gt;10</b>                                                 | Husband and/or family   | 20 (3.4%)                | 29 (5.0%)                     | 29 (5.0%)       | 27 (4.5%)      | 32 (5.5%)   | 137 (4.7%)  |
|                                                                          | Husband                 | 10 (1.7%)                | 22 (3.8%)                     | 16 (2.7%)       | 17 (2.9%)      | 23 (3.9%)   | 88 (3.0%)   |
|                                                                          | Family                  | 14 (2.4%)                | 9 (1.6%)                      | 21 (3.6%)       | 15 (2.5%)      | 16 (2.7%)   | 75 (2.6%)   |
| <b>Substance misuse</b>                                                  |                         |                          |                               |                 |                |             |             |
| <b>Use of alcohol, sedatives, inhalants, or tobacco in last 3 months</b> | 28 (4.7%)               | 23 (4.0%)                | 31 (5.3%)                     | 23 (3.9%)       | 29 (5.0%)      | 134 (4.6%)  |             |
| <b>Intervention required</b>                                             | 18 (3.1%)               | 12 (2.1%)                | 20 (3.4%)                     | 17 (2.9%)       | 15 (2.6%)      | 82 (2.8%)   |             |

ASSIST: Alcohol, Smoking and Substance Involvement Screening Test; EPDS: Edinburgh Postnatal Depression Scale; HITS: Hurt, Insulted, Threatened, Screamed at.

**STROBE Statement for BMJ Open 2021-050287**Checklist of items that should be included in reports of **cross-sectional studies**

|                           | <b>Item No</b> | <b>Recommendation</b>                                                                                                                                                                | <b>Page No</b> |
|---------------------------|----------------|--------------------------------------------------------------------------------------------------------------------------------------------------------------------------------------|----------------|
| <b>Title and abstract</b> | 1              | (a) Indicate the study's design with a commonly used term in the title or the abstract                                                                                               | 1              |
|                           |                | (b) Provide in the abstract an informative and balanced summary of what was done and what was found                                                                                  | 3              |
| <b>Introduction</b>       |                |                                                                                                                                                                                      |                |
| Background/rationale      | 2              | Explain the scientific background and rationale for the investigation being reported                                                                                                 | 6              |
| Objectives                | 3              | State specific objectives, including any prespecified hypotheses                                                                                                                     | 7              |
| <b>Methods</b>            |                |                                                                                                                                                                                      |                |
| Study design              | 4              | Present key elements of study design early in the paper                                                                                                                              | 7              |
| Setting                   | 5              | Describe the setting, locations, and relevant dates, including periods of recruitment, exposure, follow-up, and data collection                                                      | 7              |
| Participants              | 6              | (a) Give the eligibility criteria, and the sources and methods of selection of participants                                                                                          | 7              |
| Variables                 | 7              | Clearly define all outcomes, exposures, predictors, potential confounders, and effect modifiers. Give diagnostic criteria, if applicable                                             | 8              |
| Data sources/measurement  | 8*             | For each variable of interest, give sources of data and details of methods of assessment (measurement). Describe comparability of assessment methods if there is more than one group | 8              |
| Bias                      | 9              | Describe any efforts to address potential sources of bias                                                                                                                            | 7              |
| Study size                | 10             | Explain how the study size was arrived at                                                                                                                                            | 7              |
| Quantitative variables    | 11             | Explain how quantitative variables were handled in the analyses. If applicable, describe which groupings were chosen and why                                                         | 8              |
| Statistical methods       | 12             | (a) Describe all statistical methods, including those used to control for confounding                                                                                                | 9              |
|                           |                | (b) Describe any methods used to examine subgroups and interactions                                                                                                                  | 9              |
|                           |                | (c) Explain how missing data were addressed                                                                                                                                          | 9              |
|                           |                | (d) If applicable, describe analytical methods taking account of sampling strategy                                                                                                   | 9              |
|                           |                | (e) Describe any sensitivity analyses                                                                                                                                                | 9              |
| <b>Results</b>            |                |                                                                                                                                                                                      |                |

|                          |     |                                                                                                                                                                                                                                                                                                 |    |
|--------------------------|-----|-------------------------------------------------------------------------------------------------------------------------------------------------------------------------------------------------------------------------------------------------------------------------------------------------|----|
| Participants             | 13* | (a) Report numbers of individuals at each stage of study—eg numbers potentially eligible, examined for eligibility, confirmed eligible, included in the study, completing follow-up, and analysed<br>(b) Give reasons for non-participation at each stage<br>(c) Consider use of a flow diagram | 10 |
| Descriptive data         | 14* | (a) Give characteristics of study participants (eg demographic, clinical, social) and information on exposures and potential confounders                                                                                                                                                        | 10 |
|                          |     | (b) Indicate number of participants with missing data for each variable of interest                                                                                                                                                                                                             | 10 |
| Outcome data             | 15* | Report numbers of outcome events or summary measures                                                                                                                                                                                                                                            | 10 |
| Main results             | 16  | (a) Give unadjusted estimates and, if applicable, confounder-adjusted estimates and their precision (eg, 95% confidence interval). Make clear which confounders were adjusted for and why they were included                                                                                    | 11 |
|                          |     | (b) Report category boundaries when continuous variables were categorized                                                                                                                                                                                                                       | 11 |
|                          |     | (c) If relevant, consider translating estimates of relative risk into absolute risk for a meaningful time period                                                                                                                                                                                | 11 |
| Other analyses           | 17  | Report other analyses done—eg analyses of subgroups and interactions, and sensitivity analyses                                                                                                                                                                                                  | 12 |
| <b>Discussion</b>        |     |                                                                                                                                                                                                                                                                                                 |    |
| Key results              | 18  | Summarise key results with reference to study objectives                                                                                                                                                                                                                                        | 13 |
| Limitations              | 19  | Discuss limitations of the study, taking into account sources of potential bias or imprecision. Discuss both direction and magnitude of any potential bias                                                                                                                                      | 14 |
| Interpretation           | 20  | Give a cautious overall interpretation of results considering objectives, limitations, multiplicity of analyses, results from similar studies, and other relevant evidence                                                                                                                      | 15 |
| Generalisability         | 21  | Discuss the generalisability (external validity) of the study results                                                                                                                                                                                                                           | 16 |
| <b>Other information</b> |     |                                                                                                                                                                                                                                                                                                 |    |
| Funding                  | 22  | Give the source of funding and the role of the funders for the present study and, if applicable, for the original study on which the present article is based                                                                                                                                   | 20 |

# BMJ Open

## PHYSICAL MORBIDITY AND PSYCHOLOGICAL AND SOCIAL CO-MORBIDITIES AT FIVE STAGES DURING PREGNANCY AND AFTER CHILDBIRTH – A MULTI-COUNTRY CROSS SECTIONAL SURVEY

|                                 |                                                                                                                                                                                                                                                                                                                                                                                                                                                                                                                                                                                                                                                                                 |
|---------------------------------|---------------------------------------------------------------------------------------------------------------------------------------------------------------------------------------------------------------------------------------------------------------------------------------------------------------------------------------------------------------------------------------------------------------------------------------------------------------------------------------------------------------------------------------------------------------------------------------------------------------------------------------------------------------------------------|
| Journal:                        | <i>BMJ Open</i>                                                                                                                                                                                                                                                                                                                                                                                                                                                                                                                                                                                                                                                                 |
| Manuscript ID                   | bmjopen-2021-050287.R1                                                                                                                                                                                                                                                                                                                                                                                                                                                                                                                                                                                                                                                          |
| Article Type:                   | Original research                                                                                                                                                                                                                                                                                                                                                                                                                                                                                                                                                                                                                                                               |
| Date Submitted by the Author:   | 24-Jan-2022                                                                                                                                                                                                                                                                                                                                                                                                                                                                                                                                                                                                                                                                     |
| Complete List of Authors:       | McCauley , Mary; Liverpool School of Tropical Medicine, Centre for Maternal and Newborn Health<br>White, Sarah; Liverpool School of Tropical Medicine, International Public Health<br>Bar-Zeev, Sarah; Centre for Maternal and Newborn Health, Lilongwe Office, Lilongwe, Malawi<br>Godia, Pamela; Liverpool School of Tropical Medicine - Kenya, Centre for Maternal and Newborn Health<br>Mittal, Pratima; Department of Obstetrics & Gynecology Vardhman Mahavir Medical College and Safdarjung Hospital, New Delhi-110029, India.,<br>Zafar, Shamsa; Air University,<br>van den Broek, Nynke; Liverpool School of Tropical Medicine, Centre for Maternal and Newborn Health |
| <b>Primary Subject Heading</b>: | Global health                                                                                                                                                                                                                                                                                                                                                                                                                                                                                                                                                                                                                                                                   |
| Secondary Subject Heading:      | Obstetrics and gynaecology, Public health                                                                                                                                                                                                                                                                                                                                                                                                                                                                                                                                                                                                                                       |
| Keywords:                       | PUBLIC HEALTH, EPIDEMIOLOGY, OBSTETRICS                                                                                                                                                                                                                                                                                                                                                                                                                                                                                                                                                                                                                                         |
|                                 |                                                                                                                                                                                                                                                                                                                                                                                                                                                                                                                                                                                                                                                                                 |

SCHOLARONE™  
Manuscripts



I, the Submitting Author has the right to grant and does grant on behalf of all authors of the Work (as defined in the below author licence), an exclusive licence and/or a non-exclusive licence for contributions from authors who are: i) UK Crown employees; ii) where BMJ has agreed a CC-BY licence shall apply, and/or iii) in accordance with the terms applicable for US Federal Government officers or employees acting as part of their official duties; on a worldwide, perpetual, irrevocable, royalty-free basis to BMJ Publishing Group Ltd ("BMJ") its licensees and where the relevant Journal is co-owned by BMJ to the co-owners of the Journal, to publish the Work in this journal and any other BMJ products and to exploit all rights, as set out in our [licence](#).

The Submitting Author accepts and understands that any supply made under these terms is made by BMJ to the Submitting Author unless you are acting as an employee on behalf of your employer or a postgraduate student of an affiliated institution which is paying any applicable article publishing charge ("APC") for Open Access articles. Where the Submitting Author wishes to make the Work available on an Open Access basis (and intends to pay the relevant APC), the terms of reuse of such Open Access shall be governed by a Creative Commons licence – details of these licences and which [Creative Commons](#) licence will apply to this Work are set out in our licence referred to above.

Other than as permitted in any relevant BMJ Author's Self Archiving Policies, I confirm this Work has not been accepted for publication elsewhere, is not being considered for publication elsewhere and does not duplicate material already published. I confirm all authors consent to publication of this Work and authorise the granting of this licence.

1  
2  
3 **PHYSICAL MORBIDITY AND PSYCHOLOGICAL AND SOCIAL CO-MORBIDITIES AT FIVE**  
4 **STAGES DURING PREGNANCY AND AFTER CHILDBIRTH – A MULTI-COUNTRY CROSS**  
5 **SECTIONAL SURVEY**  
6  
7  
8  
9

10 **Authors:**

11 MCCAULEY, Mary<sup>1,2\*</sup>

12 WHITE, Sarah A<sup>1</sup>

13 BAR-ZEEV, Sarah<sup>3</sup>

14 GODIA, Pamela<sup>4</sup>

15 MITTAL, Pratima<sup>5</sup>

16 ZAFAR, Shamsa<sup>6</sup>

17 VAN DEN BROEK, Nynke<sup>1</sup>

18  
19  
20  
21  
22  
23  
24  
25 <sup>1</sup>Centre for Maternal and Newborn Health, Liverpool School of Tropical Medicine, Liverpool,  
26 United Kingdom

27  
28 <sup>2</sup>Liverpool Women's Hospital, Crown Street, Liverpool, United Kingdom

29  
30 <sup>3</sup>Centre for Maternal and Newborn Health, Lilongwe Office, Lilongwe, Malawi

31  
32 <sup>4</sup>Centre for Maternal and Newborn Health, Nairobi Office, Nairobi, Kenya

33  
34 <sup>5</sup>Department of Obstetrics and Gynaecology, Safdarjung Hospital, New Delhi, India

35  
36 <sup>6</sup>Fazaia Medical College, Air University, Islamabad, Pakistan

37  
38 \*Corresponding author:

39 Mary McCauley

40 Consultant Obstetrician

41 Liverpool Women's Hospital

42 Crown Street

43 Liverpool

44 Email: mary.mccauley1@lwh.nhs.uk

45  
46  
47  
48 **Abstract word count:** 303 words

49  
50 **Text word count:** 4883 words

## Abstract

### Objective

Maternal morbidity affects millions of women, the burden of which is highest in low resource settings. We sought to explore when this ill-health occurs and is most significant.

### Settings

A descriptive observational cross-sectional study at primary and secondary-level healthcare facilities in India, Pakistan, Kenya, and Malawi.

### Participants

Women attending for routine antenatal care, childbirth, or postnatal care at the study healthcare facilities.

### Primary and secondary outcomes

Physical morbidity (infectious, medical, obstetric), psychological and social morbidity co-morbidity were assessed at five stages: first half of pregnancy ( $\leq 20$  weeks), second half of pregnancy ( $> 20$  weeks), at birth (within 24 hours of childbirth), early postnatal (day 1–7) and late postnatal (week 2–12).

### Results

11,454 women were assessed: India (2,099) Malawi (2,923) Kenya (3,145) and Pakistan (3,287) with similar numbers assessed at each of the five assessment stages in each country. Infectious morbidity and anaemia are highest in the early postnatal stage (26.1%, 53.6% respectively). For HIV, malaria and syphilis combined, prevalence was highest in the first half of pregnancy (10.0%). Hypertension, pre-eclampsia, and urinary incontinence are most common in the second half of pregnancy (4.6%, 2.1%, 6.6%). Psychological (depression, thoughts of self-harm) and social morbidity (domestic violence, substance misuse) are significant at each stage but most commonly reported in the second half of pregnancy (26.4%, 17.6%, 40.3%, 5.9% respectively). Of all women assessed, maternal morbidity was highest in the second half of pregnancy (81.7%), then the early postnatal stage (80.5%). Across the four countries, maternal morbidity was highest in the second half of pregnancy in Kenya (73.8%) and Malawi (73.8%), and in the early postnatal stage in Pakistan (92.2%) and India (87.5%).



## Conclusions

Women have significant maternal morbidity across all stages of the continuum of pregnancy and childbirth, and especially in the second half of pregnancy and after childbirth.

## Keywords

Maternal morbidity, co-morbidity, multi-morbidity, antenatal, postnatal, screening, psychological ill-health, social ill-health, low- and middle- income countries.

## Ethics

The Liverpool School of Tropical Medicine, Liverpool, UK, granted full ethical approval (LSTM14.025). Ethical approval was also obtained from each country-specific research ethics committee: The College of Medicine Research and Ethics Committee, College of Medicine, Blantyre, Malawi (P.07/14/1600); Kenyatta National Hospital and University of Nairobi, Ethics and Research Committee, Nairobi, Kenya (P574/09/214); Research and Ethics Committee, Vardhman Mahavir Medical College and Safdarjung Hospital, New Delhi, India (IEC/SJH/VMMC/Project/September-14/19/482); and the National Bioethics Committee, Islamabad, Pakistan (4-87/14/NBC-159/RDC/1850). Written informed consent was obtained from each woman who participated in the study.

## Funding

Global Health Grant (OPP1033805) from Bill and Melinda Gates Foundation via the World Health Organization (WHO) and a grant from the Department of International Development, London UK, under the Making It Happen programme (202945-101). The funders played no role in the writing of the manuscript or the decision to submit it for publication.

## Article summary

### Strengths and limitations of this study

- This is one of the first studies to comprehensively describe the burden of maternal multi-morbidity at five assessment stages during pregnancy and after childbirth, using a standardised approach to assess the physical, psychological, and social components of ill-health in combination with objective clinical and laboratory measurements.
- A large sample (11,454) of women across four low-and middle- income countries were surveyed at five assessment stages during pregnancy and after childbirth.
- We describe when different types of maternal morbidity occur most frequently.
- The study population assessed women who had accessed care at a healthcare facility for routine antenatal care, childbirth and/or postnatal care, and did not assess the burden of maternal morbidity in women who did not access care.
- The study population we assessed in each country may not be generalizable to different regions of the same country or to other low-and middle-income countries.

## Introduction

The global maternal health agenda has undergone a re-focus from preventing maternal deaths to promoting women's health and wellness [1,2]. Addressing the burden of maternal multi-morbidity during and after pregnancy and the need to prevent and treat chronic and non-communicable diseases, is gaining importance as new focus for global initiatives, consistent with the current international strategy that all women have the right to the highest attainable standard of health and well-being, including all dimensions of health i.e., physical, psychological, and social health [1,2,3]. An international aim is to ensure that every woman in every setting has an equal chance to 'survive and thrive' during and after pregnancy and that every mother can enjoy a wanted and healthy pregnancy, safe childbirth, and full recovery after childbirth [1,2]. However, currently this is not the case for many women in low- and middle- income countries (LMIC) with recent studies reporting that there is likely to be a significant burden of physical morbidity and co-morbidities during and after pregnancy which may remain un-recognised and untreated if routine care services are not improved [4-7]. Over the past 10 years, the focus of many maternal health intervention programs in LMIC has been centred on care during childbirth and the time immediately after birth with the aim to reduce the global burden of maternal deaths, stillbirths, and early neonatal deaths; 'the triple return' [2]. Focusing only on the number of women who die, ignores the women who suffer both severe and non-severe complications related to pregnancy and childbirth [8,9]. Until recently, less emphasis has been placed on ensuring the availability and quality of maternity care during and after pregnancy, and the need to improve maternal health outcomes and experiences. Maternal morbidity represents a critical interface in the continuum between a healthy pregnancy and childbirth and maternal death [10]. While some mothers will recover from their experienced ill-health with or without treatment, others will not. An increased awareness and understanding of the burden of physical morbidity and associated psychological and/or social co-morbidity, along with prevention, early recognition and appropriate management where required, are important steps that need to be taken to improve maternal health, reduce adverse pregnancy outcomes and potentially averting preventable deaths [4-11]. Maternal morbidity is defined as 'any health condition attributed to and/or complicating pregnancy, and childbirth that has a negative impact on the woman's wellbeing' [12]. Several recent

1  
2  
3 studies have attempted to describe and/or measure the burden of maternal morbidity in  
4 line with this new definition in women in low resources settings [4-7,13-15]. However, there  
5 is still a lack of information regarding when (during pregnancy or after childbirth) this  
6 burden occurs and is most significant. This should inform when the optimal timing is for  
7 screening, prevention, and management. The objective of this study was to assess the  
8 prevalence and types of maternal morbidity (infectious, medical/obstetric )and psychological  
9 and social co-morbidities for each of five different stages during and after pregnancy.  
10 Secondly, we explored and compared findings by geographical settings across four LMICs.  
11  
12  
13  
14  
15  
16  
17  
18

## 19 **Materials and Methods**

### 20 **Study design and settings**

21  
22 The details of the study design, setting, participants have been described previously [6]. In  
23 summary, we conducted a descriptive observational cross-sectional study in India, Pakistan,  
24 Kenya, and Malawi, across as representative sample of 12 secondary and 17 primary care  
25 level facilities in rural and urban areas.  
26  
27  
28  
29  
30  
31  
32

### 33 **Participants**

34  
35 All women attending for antenatal care, childbirth or postnatal care at the study healthcare  
36 facilities were eligible for inclusion. Women who were too ill and unable to speak to  
37 participate (for example altered conscious level after an eclamptic seizure) were excluded.  
38 Each woman was assessed at one of the five stages of pregnancy: first half of pregnancy  
39 ( $\leq 20$  weeks), second half of pregnancy ( $> 20$  weeks), birth (within 24 hours of childbirth),  
40 early postnatal (days 1-7) and late postnatal (weeks 2-12). For the antenatal assessments,  
41 gestation was calculated based on the women's last menstrual period or the results of a  
42 dating scan if available. Women were recruited sequentially until the target sample size for  
43 each assessment stage was reached in each healthcare facility. All women who consented to  
44 take part in the study were interviewed and had a full clinical examination, and basic urine  
45 and serological investigations performed by trained healthcare providers (midwives and  
46 doctors). Data was collected using a standardised structured questionnaire formatted onto  
47 electronic tablets in India, Pakistan and Kenya. Paper questionnaires were used in Malawi.  
48 Demographics including age, marital status, occupation and educational level and socio-  
49  
50  
51  
52  
53  
54  
55  
56  
57  
58  
59  
60

1  
2  
3 economic status were assessed. Current physical symptoms were assessed using 76  
4 questions covering six organ systems - cardiopulmonary, gastrointestinal, musculoskeletal,  
5 uro-gynaecology, obstetric, and breast, and miscellaneous (dermatology, endocrine,  
6 neurological, immunology, ear-nose-throat). Psychological health was assessed using the  
7 Edinburgh Postnatal Depression Scale (EPDS) using a cut-off point of >10 [15]. The 'Hurt,  
8 Insulted, Threatened, Screamed at' (HITS) questionnaire was used to assess domestic  
9 violence, from the husband or partner and/or other family members (with a score of >10  
10 indicating significant abuse) [16]. Four questions from the 'Alcohol, Smoking and Substance  
11 Involvement Screening Test (ASSIST)' questionnaire were included [17]. Clinical parameters  
12 including height, weight, pulse rate (PR), respiratory rate (RR), blood pressure (BP), and oral  
13 temperature (T) were measured and the conjunctiva, sclera, breast, abdomen (general and  
14 obstetric) were examined. Inspection of the perineum and/or speculum examination was  
15 only conducted if clinically indicated (for symptoms of vaginal discharge, bleeding, pain).  
16 Urinalysis was performed using Multistix GP<sup>®</sup>. A simple finger prick test was used to obtain  
17 one capillary (<0.5ml) of blood for use in four rapid diagnostic tests: haemoglobin  
18 (Hemocue<sup>®</sup>), malaria (Humasis<sup>®</sup>), syphilis and Human Immunodeficiency Virus (HIV) (SD  
19 BIOLINE HIV/Syphilis Duo<sup>®</sup>), and C-reaction protein (CRP) (QuickRead<sup>®</sup>). A reported  
20 symptom of cough >two weeks was used to identify chest infection and/or suspected  
21 tuberculosis. Anaemia was classified as haemoglobin less than 110 g/l (WHO 2011).  
22 Hypertension was classified as BP $\geq$ 140/90 [18]. Pre-eclampsia was defined as BP $\geq$ 140/90,  
23 and proteinuria (PR >++ on urinalysis) after 20 weeks' gestation [19]. We amended the  
24 Systematic Inflammatory Response Syndrome (SIRS) score to define possible early infection  
25 as the presence of two or more of the following: (1) T>38 °C or <36°C, (2) PR>90 beats per  
26 minute; (3) RR>20 breaths per minute or (4) raised CRP (defined as >5mg/dL at each  
27 assessment stage, apart from the early postnatal period (first 7 days) where raised CRP was  
28 defined as >10mg/dL [20]. Antenatal haemorrhage was defined as women who reported  
29 bleeding per vagina during pregnancy and/or who had this confirmed on examination.  
30 Incontinence was defined as all women who reported any leakage of urine and/or had this  
31 confirmed-on examination. Summative physical morbidity was categorised as (1) infectious  
32 or (2) medical or obstetric. Infectious morbidity included: HIV, malaria, syphilis, chest  
33 infection and/or suspected tuberculosis, and a SIRS score of  $\geq$ 2. Medical or obstetric  
34 morbidity included: anaemia, hypertension, pre-eclampsia, antenatal haemorrhage, and  
35  
36  
37  
38  
39  
40  
41  
42  
43  
44  
45  
46  
47  
48  
49  
50  
51  
52  
53  
54  
55  
56  
57  
58  
59  
60

1  
2  
3 urinary incontinence. Psychological morbidity was defined as an EPDS score of  $\geq 10$  and/or  
4 thoughts of self-harm. Social morbidity was defined as a woman reporting any domestic  
5 violence (HITS score  $>4$ ) and/or any substance misuse. Maternal morbidity was considered  
6 as at least one physical morbidity, or psychological or social co-morbidity.  
7  
8  
9

## 10 11 12 **Sample size calculation and statistical analysis**

13  
14 In Pakistan, Kenya, and Malawi for each of the five assessment stages, data were collected  
15 for a minimum of 576 women across two levels of healthcare facility (primary and  
16 secondary) selected by stratified cluster sampling [6]. In India, as the study was conducted in  
17 one facility (secondary level facility offering primary and secondary care) a cluster sampling  
18 approach was not required, giving an amended sample size of 1,900 with a minimum of 380  
19 women per assessment stage [6]. This sample size had 95% power to detect the presence of  
20 any morbidity with a prevalence greater than 1%. Data analysis was performed using SPSS  
21 version 22 and Stata version 12.1. Unless otherwise stated, all percentages reported use the  
22 total sample size for the relevant country. Where a substantial percentage of women have  
23 data missing for a variable ( $>10\%$ ) this is stated in the text, but the numbers missing are not  
24 tabulated. Percentages are derived using the number of women who responded per  
25 assessment stage. Analysis was conducted separately for each stage of pregnancy for each  
26 country and then for each stage of pregnancy for women in all countries combined as a  
27 cohort.  
28  
29  
30  
31  
32  
33  
34  
35  
36  
37  
38  
39  
40

## 41 **Ethics**

42  
43 This research was conducted along with the ethics from the Declaration of Helsinki. The  
44 Liverpool School of Tropical Medicine, Liverpool, UK, granted full ethical approval  
45 (LSTM14.025). Ethical approval was also obtained from each country-specific research ethics  
46 committee: The College of Medicine Research and Ethics Committee, College of Medicine,  
47 Blantyre, Malawi (P.07/14/1600); Kenyatta National Hospital and University of Nairobi,  
48 Ethics and Research Committee, Nairobi, Kenya (P574/09/214); Research and Ethics  
49 Committee, Vardhman Mahavir Medical College and Safdarjung Hospital, New Delhi, India  
50 (IEC/SJH/VMMC/Project/September-14/19/482); and the National Bioethics Committee,  
51  
52  
53  
54  
55  
56  
57  
58  
59  
60

1  
2  
3 Islamabad, Pakistan (4-87/14/NBC-159/RDC/1850). Written informed consent was obtained  
4 from each woman who participated in the study.  
5  
6  
7

## 8 **Patient and public involvement**

9 No patient nor members of the public were involved in the design, conduct or dissemination  
10 of this study.  
11  
12  
13

## 14 **Results**

### 15 **Study population**

16 A total of 11,454 women across four LMICs were assessed: India (2,099), Pakistan (3,287),  
17 Kenya (3,145) and Malawi (2,923) with similar numbers of women assessed at each of the  
18 five stages, during and after pregnancy. The socio-demographic and obstetric characteristics  
19 of women per stage are displayed in **Supplementary Table 1**. Results are reported for the  
20 combined cohort of women and where there are significant differences between the  
21 women from each country, these are commented upon in the narrative text. Data obtained  
22 for each country for each pregnancy stage are detailed in **Supplementary Tables 2-9**.  
23  
24  
25  
26  
27  
28  
29  
30  
31  
32

### 33 **Reported symptoms and severity for each stage of pregnancy**

34 Overall, 8,420 women (73.5%) reported at least one physical symptom of ill-health at any of  
35 the assessment points during or after pregnancy with a median (interquartile range, IQR) of  
36 2 (0-5) symptoms per woman. The number of symptoms reported by women varied  
37 statistically significantly with stage of pregnancy (using categories presented in **Figure 1**,  
38  $\chi^2=330$ ,  $df=12$ ,  $p<0.001$ ). In the second half of pregnancy the median (IQR) was 3 (1-6),  
39 [significantly higher than for the other stages. ; In the late postnatal stage it was 1 (0-3);  
40 whereas for the first half of pregnancy it was 2 (0-4), within 24 hours of childbirth it was 2  
41 (1-5) and early postnatal it was 2 (0-5). The percentage of women with reported physical ill-  
42 health (at least one symptom reported) was highest within 24 hours of childbirth (80.9%)  
43 and the percentage of women who reported at least four symptoms was highest (43.1%) in  
44 the second half of pregnancy (**Figure 1**). The percentage of women reporting that they had  
45 symptoms that were bothering them 'a lot' was similar at each stage of pregnancy and  
46 ranged from 11.0% to 16.6% (**Figure 1**). Women living in Pakistan reported higher severities  
47 of symptoms compared to India, Kenya, and Malawi; and across all five assessment points.  
48  
49  
50  
51  
52  
53  
54  
55  
56  
57  
58  
59  
60

1  
2  
3 At the start of the pregnancy 11.7% of women had  $\geq 3$  abnormalities on clinical examination  
4 and 22.2% of women had  $\geq 2$  abnormalities on urine and/or blood investigation (**Figure 1**).  
5  
6 The highest percentage of women with  $\geq 3$  abnormalities on clinical examination or  $\geq 2$   
7 abnormalities on urine and/or blood investigation were in the early postnatal stage (23.5%  
8 and 37.1% respectively) (**Figure 1**).  
9  
10  
11

### 12 Infectious morbidity

13  
14 The percentage of women with early signs of infection (SIRS score  $\geq 2$ ) was highest in the  
15 early postnatal period (26.1%) and second half of pregnancy (25.1%). Similar percentages of  
16 women were detected to be HIV positive across all five assessment stages. The percentage  
17 of women with malaria and syphilis was highest in the first half of pregnancy (3.9% and 1.6%  
18 respectively) with decreased prevalence at subsequent points (**Table 1**). For the three main  
19 diseases combined (malaria, syphilis, and HIV), prevalence was 8.4% overall and highest in  
20 the first half of pregnancy (10.0%). This varied per country (**Supplementary Tables 2-5**) and  
21 was 0.4% in India, 0.6% in Pakistan with no syphilis and rare cases of malaria), 4.1% in Kenya  
22 (mainly HIV) substantially higher in Malawi (27.9% including HIV 14.3%, malaria 10.2% and  
23 syphilis 3.4%). The percentage of women with a positive SIRS score was highest in Kenya in  
24 the early postnatal period (44.8%) followed by Malawi at 30.1% in the early postnatal  
25 period, 16.6% in India and 15.9% in Pakistan, both in the second half of pregnancy  
26 (**Supplementary Tables 2-5**).  
27  
28  
29  
30  
31  
32  
33  
34  
35  
36  
37

### 38 Medical and obstetric morbidity

39  
40 Overall, 1 in 2 women had anaemia during or after pregnancy, the prevalence of was highest  
41 in the early postnatal period (53.6% with 2.8% severe anaemia) with 40% of women  
42 anaemic in early pregnancy (**Table 1**). The prevalence of anaemia was particularly high in  
43 Pakistan in the second half of pregnancy (76.8% with 3.5% severe anaemia), and in India in  
44 the early postnatal period (71.5% with 3.9% severe anaemia) (**Supplementary Table 2-5**).  
45 With regards to nutritional status, 3.0% of women had a low BMI ( $<18.5\text{kg/m}^2$ ) in the first  
46 half of pregnancy and in the early postnatal stage (**Table 1**). Overall, the highest prevalence  
47 of hypertension or pre-eclampsia was in the second half of pregnancy (4.6% and 2.1%  
48 respectively), and this was similar across all four countries; except in India, where the  
49 highest percentage of women with pre-eclampsia was in the early postnatal stage (0.2%).  
50 Urinary incontinence was consistently most commonly reported in the second half of  
51  
52  
53  
54  
55  
56  
57  
58  
59  
60



1  
2  
3 pregnancy (6.6% overall) dropping to 3.3% in the late postnatal period. Urinary incontinence  
4 was comparatively higher in Pakistan with late postnatal urinary incontinence in 10.2% of  
5 women in the late postnatal period compared to nil in India, 0.3% in Malawi and 1.4% in  
6 Kenya (**Supplementary Table 2-5**). Overall, antenatal haemorrhage was reported in 6.3% of  
7 women in the first half of pregnancy stage and 3.0% in the second half of pregnancy.  
8 Overall, as a combined cohort 50.0% of women had at least one medical or obstetric  
9 morbidity; with the highest prevalence in the early postnatal stage in India (72.0%) and  
10 Kenya (34.5%) or the second half of pregnancy in Pakistan (80.6%) and Malawi (44.8%)  
11 (**Supplementary Tables 2-5**).

### 12 **Psychological co-morbidity**

13 Overall, 26.7% of women reported psychological morbidity; 22.9% of women had an EPDS  
14 score of  $\geq 10$ ; and 15.2% of women reported thoughts of self-harm [6]. Depression was the  
15 commonest form of psychological morbidity at each assessment stage, with the highest  
16 percentage of women reporting symptoms of depression or thoughts of self-harm in the  
17 second half of pregnancy (26.4% and 17.6% respectively) compared to the early (22.2% and  
18 15.5%) or late postnatal periods (20.3% and 15.7%) (**Table 2**). These trends were similar in  
19 India, Pakistan, and Kenya but in Malawi, psychological morbidity was highest within 24  
20 hours of childbirth (18.9%) (**Supplementary Tables 6-9**).

### 21 **Social co-morbidity**

22 Overall, 3883 (33.9%) women reported domestic violence (HITS >4) and 969 (8.5%) reported  
23 higher levels of domestic violence (HITS>10) from their partner/husband and or family  
24 members [6]. The highest percentage of women who reported domestic violence (HITS >4),  
25 and higher levels of domestic violence (HITS>10) was in the second half of pregnancy stage  
26 (40.3% and 28.6% respectively) (**Table 2**). Higher percentages of women reported domestic  
27 violence in the second half of pregnancy in Pakistan (60.4%), Kenya (29.4%) and Malawi  
28 (24.3%), compared to India, where more women reported domestic violence in the early  
29 postnatal period (43.7%) (**Supplementary Tables 6-9**).

30 Overall, 672 (5.9%) women reported substance misuse, of which 202 (1.8%) required  
31 intervention and this was highest in Pakistan and India in the early postnatal period (12.0  
32 and 2.8% respectively) (**Supplementary Tables 6,7**) and in the late postnatal period in Kenya  
33 (9.6%) or within 24 hours of childbirth in Malawi (5.3%) (**Supplementary Tables 8,9**).

### Multi-morbidity for each pregnancy stage

Overall, 8936 (78.0%) women reported maternal morbidity (infectious, medical, obstetric, psychological, or social) [6]. The percentages of women reporting maternal morbidity were Pakistan: 90.1%, India: 83.9%, Malawi: 71.9%, and Kenya: 67.1%. Of all women assessed, occurrence of maternal morbidity was highest in the second half of pregnancy (81.7%); followed by the early postnatal stage (80.5%), and within 24 hours of childbirth (79.0%). Similar percentages of women had maternal morbidity in the first half of pregnancy (74.8%) and the late postnatal stage (73.9%). The highest occurrence of maternal morbidity was in the second half of pregnancy in Kenya (73.8%) and Malawi (73.8%). In India and Pakistan, the highest percentage of women who had maternal morbidity was in the early postnatal stage (87.5%, 92.2% respectively). As a combined cohort, the different types of maternal morbidity occurred in similar measures across the continuum of pregnancy and childbirth (**Figure 2**). The range of variation in the means was about 5% for infectious and psychological morbidity, and about 10% for medical/obstetric and social morbidities (**Figure 2**).

## Discussion

### Main findings

Women have significant maternal morbidity during pregnancy and after childbirth. Prevalence of maternal morbidity is highest in the second half of pregnancy and after childbirth. Most women report physical symptoms after childbirth (80.9%), and the maximum number of different symptoms is experienced in the second half of pregnancy with a median (IQR) of 3 (1-6) symptoms reported per woman. In this population of women attending for routine antenatal or postnatal care, the percentage of women with an abnormal examination and/or investigation was highest in the first half of pregnancy (62.8%, 67.3% respectively). The burden of infectious morbidity was highest in the early postnatal stage with 26.1% of women having possible early signs of infection (SIRS score  $\geq 2$ ). However, early signs of infection also occurred in 1 in 5 women early or late in pregnancy and in the late postnatal period. The burden of infectious disease varied per country with malaria, syphilis and HIV more common in Malawi and Kenya (27.9% and 4.1% respectively) than in Pakistan or India although up to 1 in 15 women have evidence of infective morbidity most commonly in the second half of pregnancy (14.6% in India and 12.6% in Pakistan).

1  
2  
3 Anaemia including severe anaemia is most commonly seen in the early postnatal stage  
4 (53.6%) but up to 64.1% of women in Pakistan are already anaemic in the first half of  
5 pregnancy. As expected, hypertension, pre-eclampsia and urinary incontinence were more  
6 common in the second half of pregnancy and haemorrhage more common in early  
7 pregnancy. Psychological morbidity including symptoms of depression and thoughts of self-  
8 harm (29.7% and 17.6% respectively) was most commonly diagnosed in late pregnancy with  
9 still significant but lower prevalence in the late postnatal period (24.9% and 15.7%).  
10 Similarly, social morbidity was found to be highest in the second half of pregnancy with  
11 overall 40% of women reporting domestic violence from their husband or family. Substance  
12 abuse was comparatively low with up to 2.2% of women overall having an ASSIST score of  
13 >4 in the late postnatal period.

### 23 **Strengths and limitations of the study**

24 To the best of our knowledge, this is the first study to measure the burden of maternal  
25 morbidity in a large sample (11,454) of women across four LMICs considering five separate  
26 stages during pregnancy and after childbirth. Our study provides measurements of maternal  
27 physical morbidity (infective, medical, or obstetric) as well as co-morbidities (psychological  
28 and/or social) using clear and concise definitions and clinical assessment methodology,  
29 enabling comparisons between different settings and countries. We documented very low  
30 refusal rate (range 1.1% -2.5%) and working in 'real life' settings during routine antenatal  
31 and postnatal care provision in each setting and conclude that it is acceptable to women  
32 and their healthcare providers, and in principle feasible, to screen women for all the  
33 different types of maternal morbidity as part of routine healthcare consultations. Further  
34 strengths of this study are that both subjective (self-reported symptoms) and objective  
35 measures (examination and investigations) are included enabling a 'diagnosis' to be made  
36 where needed rather than using a syndromic approach only. Finally, women were assessed  
37 as late as up to 12 weeks' post-childbirth. We note that this study population assessed  
38 women who had accessed care at a healthcare facility for routine antenatal or postnatal and  
39 was not able to assess the burden of maternal morbidity in women who did not access care  
40 and/or in women who may have experienced adverse pregnancy outcome (e.g., stillbirth)  
41 and who do not generally attend for postnatal care. Such women might have an even higher  
42 burden of pregnancy related morbidity. However, we note that many women in these  
43  
44  
45  
46  
47  
48  
49  
50  
51  
52  
53  
54  
55  
56  
57  
58  
59  
60

1  
2  
3 settings do access care at least once during pregnancy (77%) and that skilled birth  
4 attendance during childbirth is more common (55%) [21,22]. We assessed women in two  
5 antenatal contacts only (early and late pregnancy) and future studies could consider  
6 assessing women in each trimester. We note that the study population we assessed in each  
7 country may not be generalizable to different regions of the same country or to other low-  
8 and middle-income countries.

### 14 **Interpretation (considering other evidence)**

16 This paper describes the burden of maternal morbidity at five different stages during and  
17 after pregnancy in four LMIC settings. The overall burden of maternal morbidity and  
18 associated factors have been described previously by this research group [6]. At present, it is  
19 challenging to interpret measurements of maternal morbidity as there are few studies that  
20 have assessed maternal morbidity at different stages during and after pregnancy in LMIC  
21 settings [4-7,13,23]; and terms such as “maternal morbidity”, “maternal co-morbidity”,  
22 “maternal multimorbidity” have been used interchangeably. We consider our findings for  
23 each type of morbidity to studies that have explored maternal morbidity.

### 31 **Infectious morbidity (considering other evidence)**

33 Infectious morbidity is traditionally considered to be a concern after childbirth as ‘puerperal  
34 sepsis’ [24]. However, our study demonstrates that women have early signs of infection  
35 (using an adapted SIRS score) from the first half of pregnancy (21.0%), and throughout later  
36 pregnancy and childbirth (25.1 - 21.3%) and up to 12 weeks postnatal (23.1%); and that the  
37 potential causes of infection was not commonly HIV, TB, or malaria. Our findings reflect a  
38 similar study that explored non-life threatening maternal morbidity where ‘fever of  
39 unknown origin’ was noted to be highest in the second half of pregnancy in Malawi (3.5%)  
40 and in the first half of pregnancy in Pakistan (3.6%) [7]. In another study, 6% of women  
41 reported febrile symptoms at 4-12 weeks; 11% at 12-24 weeks and 13% at 24-26 weeks  
42 after childbirth in Kenya [23]. Further studies are needed to explore the significance of  
43 possible proxy measurements of infectious morbidity and to diagnose and manage  
44 underlying infection. In our study the prevalence of malaria and syphilis was highest in the  
45 first half of pregnancy stage, suggesting that with screening these conditions are detected  
46 and treated early; and/or prophylactic measures are successfully implemented (for example  
47 malaria nets and anti-malaria prophylaxis). These findings are like those reported in a similar  
48  
49  
50  
51  
52  
53  
54  
55  
56  
57  
58  
59  
60

1  
2  
3 study where the highest percentage of women with malaria was in the early pregnancy  
4 stage in Malawi (8.8%) and Pakistan (2.1%) [7]. In our study, detection of HIV was highest in  
5 the early postnatal stage (5.4%). This is a similar finding to that of the Zafar et al study  
6 where the highest percentage of women diagnosed with HIV was in the postnatal stage in  
7 Malawi (16.5%) and Pakistan (7.0%) [7]. A suggested explanation for these findings could be  
8 that these women did not attend for and/or receive screening during antenatal care but did  
9 attend for childbirth at the healthcare facility and were screened for HIV as an inpatient.  
10  
11

### 12 **Medical and obstetric morbidity (considering other evidence)**

13  
14  
15  
16  
17  
18  
19 In our study, anaemia continues to be a major morbidity at all stages during and after  
20 pregnancy, and many women start their pregnancy anaemic. The severity of anaemia  
21 increased as the pregnancy continued, and more women had severe anaemia in the early  
22 postnatal stage; and this trend was similar in the four LMIC settings. In a study assessing  
23 maternal morbidity in Kenya, the highest percentage of women with anaemia (61.0%) was  
24 at 12-24 weeks after childbirth [23]. However, this study did not assess women during  
25 pregnancy. In our study, the percentage of women with hypertension/pre-eclampsia was  
26 highest in the second half of pregnancy stage; and the highest percentage of women  
27 diagnosed with antepartum haemorrhage was in the first half of pregnancy stage. In our  
28 study, the highest percentage of women reporting urinary incontinence was in the second  
29 half of pregnancy stage 6.6%. In a similar study, the highest percentage of women reporting  
30 incontinence (urine or faeces) was in the postnatal stage in Malawi (0.9%) and Pakistan  
31 (4.7%) [7]. In the Cherish et al study, 2% of women had urine incontinence at 12-24 weeks,  
32 and 1% of women had urine incontinence at 4-12 weeks and 24-26 weeks after childbirth in  
33 Kenya [23]. In our study 3.3% of women continued to report urinary incontinence in the late  
34 postnatal stage and this may represent possible early obstetric fistula. However, in our  
35 study women who reported persistent urinary incontinence postnatally were referred for  
36 specialist input and we did not have capacity to follow these patients up for a confirmed  
37 diagnosis of possible obstetric fistula.  
38  
39  
40  
41  
42  
43  
44  
45  
46  
47  
48  
49  
50  
51  
52  
53

### 54 **Psychological morbidity (considering other evidence)**

55  
56  
57 Psychological morbidity is traditionally considered to be more significant after pregnancy,  
58 often termed 'postnatal depression'. The findings of the prevalence of psychological  
59  
60

1  
2  
3 morbidity in our study are higher than previous global estimates of 10% of women during  
4 pregnancy and 13% of women after childbirth being affected by psychological ill-health [25].  
5  
6 The findings from our study are more like those of a systematic review of studies from LMIC  
7 settings where psychological morbidity was reported to affect 15.6% of women during  
8 pregnancy and 19.8% after pregnancy [26]. Another review reported a prevalence of 1 in 4  
9 women in LMIC settings reporting depression during pregnancy and 1 in 5 reported  
10 depression after pregnancy [27]. The authors of the review suggest that the figures in LMIC  
11 settings are twice the rate of women in high-income countries and suggest that  
12 psychological morbidity in general is not reported, not assessed properly, infrequently  
13 recognised, and under-treated in many LMIC [26].  
14  
15  
16  
17  
18  
19  
20  
21

### 22 **Social morbidity (considering other evidence)**

23  
24 In our study, high percentages of women reported domestic violence and low percentages  
25 of women reported substance misuse. In a similar study, 12.8% of women self-reported  
26 exposure to violence during pregnancy and 11.0% after childbirth [1]. In a study exploring  
27 maternal morbidity in Kenya, only postnatal women were assessed, and more women  
28 reported domestic violence -physical (23.3%), sexual (56.9%) - and substance misuse (11%)  
29 at 12-24 weeks compared to 4-12 weeks and 24-26 weeks after childbirth in Kenya [23].  
30  
31  
32  
33  
34  
35

### 36 **Practical and research recommendations**

37  
38 With emerging evidence of the different types of physical multi-morbidity and co-morbidity  
39 at specific stages during pregnancy and after childbirth, there is a need for comprehensive  
40 and detailed longitudinal studies of women from early pregnancy to an extended  
41 postpartum period to understand how health and symptoms and signs of ill-health change  
42 over time and how current antenatal and postnatal programmes can be improved to  
43 address these [28]. There is ample evidence that psychological and social morbidity are  
44 associated with adverse consequences for the mother and the baby, both short and long  
45 term [29-33], and there is a need to further explore and document how these types of  
46 maternal morbidities are interlinked and associated. There is a need to refine the current  
47 definition of maternal morbidity considering the conceptualizations of “maternal  
48 multimorbidity” and/or “maternal co-morbidities”, and/or related constructs; and to clarify  
49 the timeframe over which maternal morbidity impacts a woman’s health and wellbeing  
50 [14]. Similarly, there is a gap between measuring morbidity for programmatic purposes and  
51  
52  
53  
54  
55  
56  
57  
58  
59  
60

1  
2  
3 assessing its actual impact on a woman's sense of well-being [34]. Recent studies have  
4 explored women's lived experiences of ill-health and perceptions of their health needs  
5 during and after pregnancy and these findings, in addition to the findings of our study, need  
6 to be considered when developing maternal health interventions to improve the quality of  
7 maternity care at different stages during pregnancy and after childbirth for women living in  
8 LMIC [35, 36].  
9  
10  
11  
12  
13  
14

## 15 **Conclusion**

16  
17 The overall findings from our study suggest that there is a large burden of physical  
18 morbidity, (including infectious, medical, obstetric), psychological and social co-morbidities  
19 in women during pregnancy and up to 12 weeks postnatal who access care in different  
20 levels of healthcare facilities across the four LMIC in which this study was conducted. Most  
21 importantly, the overall burden of ill-health is not simply at one 'high risk' stage of  
22 pregnancy, but women report and/or are diagnosed with significant physical morbidity and  
23 psychological and social co-morbidities throughout the continuum of pregnancy and  
24 childbirth. At present, available antenatal and especially postnatal care packages across  
25 different settings are not adequate to screen for all forms of physical morbidity (infectious,  
26 medical, obstetric) and psychological and social co-morbidities; and do not address the  
27 needs of women in a comprehensive holistic way. Anaemia and possible signs of early  
28 infection represent a significant burden of ill-health along the continuum of pregnancy and  
29 childbirth and may be useful clinical proxy markers for physical maternal morbidity. There is  
30 a need to increase the focus of high quality comprehensive maternity care (including mental  
31 and social healthcare screening and management), from the first half of pregnancy through  
32 to the late postnatal stage, to ensure improved health and well-being for women and their  
33 babies during and after pregnancy, and not just at the time of childbirth. There is a need for  
34 further research to understand how to support healthcare providers to screen for and  
35 provide evidence based care all aspects of maternal multi-morbidity (physical, psychological,  
36 and social) at all contacts during pregnancy and after childbirth.  
37  
38  
39  
40  
41  
42  
43  
44  
45  
46  
47  
48  
49  
50  
51  
52  
53  
54  
55  
56  
57  
58  
59  
60

## DECLARATIONS

### Author's contributions

MMc co-ordinated and supervised the in-country data collection, collected data, conducted data analysis, data interpretation and wrote the manuscript. SW helped design the study, checked all data analysis, and performed further analyses. SBZ supervised the data collection in Malawi, PG in Kenya, PM in India, and SZ in Pakistan. NvdB developed the study design and protocol, oversaw the design, and conduct of the study, data collection and analysis and wrote the manuscript. All authors have read, edited, and approved the final manuscript for submission.

### Acknowledgements

We would like to thank all the women who participated, all the research assistants and research supervisors in each healthcare facility involved in this study.

### Ethics

The Liverpool School of Tropical Medicine, Liverpool, UK, granted full ethical approval (LSTM14.025). Ethical approval was also obtained from each country-specific research ethics committee: The College of Medicine Research and Ethics Committee, College of Medicine, Blantyre, Malawi (P.07/14/1600); Kenyatta National Hospital and University of Nairobi, Ethics and Research Committee, Nairobi, Kenya (P574/09/214); Research and Ethics Committee, Vardhman Mahavir Medical College and Safdarjung Hospital, New Delhi, India (IEC/SJH/VMMC/Project/September-14/19/482); and the National Bioethics Committee, Islamabad, Pakistan (4-87/14/NBC-159/RDC/1850). Written informed consent was obtained from each woman who participated in the study.

### Disclosure of Funding

This study was funded by two grants given to the Centre for Maternal and Newborn Health at the Liverpool School of Tropical Medicine in the UK: a Global Health Grant (OPP1033805) from Bill and Melinda Gates Foundation via the World Health Organization (WHO) and a grant from the Department of International Development, London UK, under the Making it Happen programme (202945-101). The funders played no role in the writing of the manuscript or the decision to submit it for publication.



### **Patient and Public Involvement**

No patient or member of the public were involved in the design, conduct or dissemination of this study.

### **Competing interests**

The authors declare no competing interests.

### **Availability of data and materials**

Extra data is available from the corresponding author on reasonable request.

## Abbreviations

|        |                                                           |
|--------|-----------------------------------------------------------|
| ANC    | Antenatal care                                            |
| ASSIST | Alcohol, Smoking and Substance Involvement Screening Test |
| BP     | Blood pressure                                            |
| CRP    | C-reactive protein                                        |
| EPDS   | Edinburgh Postnatal Depression Scale                      |
| HITS   | Hurt, Insulted, Threatened, Screamed                      |
| HIV    | Human Immunodeficient Virus                               |
| ICT    | Islamabad Capital Territory                               |
| LMIC   | Low- and middle-income countries                          |
| MMR    | Maternal mortality ratio                                  |
| PNC    | Postnatal care                                            |
| PR     | Pulse rate                                                |
| QOL    | Quality of Life                                           |
| RR     | Respiratory rate                                          |
| SAMM   | Severe acute maternal morbidity                           |
| SDI    | Socio-demographic Index                                   |
| T      | Temperature                                               |
| TB     | Tuberculosis                                              |

## References

1. Transforming our world: the 2030 Agenda for Sustainable Development. Available at: [http://www.un.org/ga/search/view\\_doc.asp?symbol=A/RES/70/1&Lang=E](http://www.un.org/ga/search/view_doc.asp?symbol=A/RES/70/1&Lang=E) Accessed January 2021
2. United Nations. Every Woman, Every Child: Global Strategy; 2015. Accessed January 2021. Available at: <http://www.everywomaneverychild.org/global-strategy-2>.
3. Vos T, Barber RM, Bell B, et al. Global, regional, and national incidence, prevalence, and years lived with disability for 301 acute and chronic diseases and injuries in 188 countries, 1990–2013: a systematic analysis for the Global Burden of Disease Study 2013. *Lancet*. 2015;386:743–800. [https://doi.org/10.1016/S0140-6736\(15\)60692-4](https://doi.org/10.1016/S0140-6736(15)60692-4).
4. Barreix M, Barbour K, McCaw-Binns A, Chou D, Petzold M, Gichuhi GN, Gadama L, Taalo F, Tunçalp Ö, Say L. Standardizing the measurement of maternal morbidity: Pilot study results. *Int J Gynecol Obstet*, 2018; 141: 10-19.
5. Reece J, McCauley M, McCaw-Binns A, White SA, Samms-Vaughan M, van den Broek N. (2020) Maternal morbidity: a longitudinal study of women's health during and up to 22 months after pregnancy in Jamaica, *Psychology, Health & Medicine*, 25:6, 687-702, DOI: 10.1080/13548506.2019.1691243
6. McCauley M, Madaj B, White S, Dickinson F, Bar-Zeev S, et al. Measuring the burden of physical, psychological and social ill-health during and after pregnancy in India, Pakistan, Kenya and Malawi. April 2018. *BMJ Global Health*.
7. Zafar S, Jean-Baptiste R, Rahman A, Neilson JP, van den Broek NR. Non-life threatening maternal morbidity: cross sectional surveys from Malawi and Pakistan. *PLoS One*. 2015;10(9):e0138026.
8. Say L, Souza JP, Pattinson RC, WHO working group on Maternal Mortality and Morbidity classifications. Maternal near miss—towards a standard tool for monitoring quality of maternal health care. *Best Pract Res Clin Obstet Gynaecol* 2009; 23:287–96. DOI: 10.1016/j.bpobgyn.2009.01.007
9. Firoz T, McCaw-Binns A, Filippi V, Magee LA, Costa ML, Cecatti JG, Barreix M, Adanu R, Chou D, Say L. A framework for healthcare interventions to address maternal morbidity *Int J Gynecol Obstet*, 2018; 141: 61-68.
10. Vanderkruik RC, Tunçalp O, Chou D, Say L. Framing maternal morbidity: WHO scoping exercise. *BMC Pregnancy Childbirth*. 2013; 13:213.
11. Chou D, Tunçalp Ö, Firoz T, Barreix M, Filippi V, von Dadelszen P, et al. Constructing maternal morbidity – towards a standard tool to measure and monitor maternal health beyond mortality. *BMC Pregnancy Childbirth*. 2016;16:45.
12. Firoz T, Chou D, von Dadelszen P, Agrawal P, Vanderkruik R, Tunçalp Ö, et al. Measuring maternal health: focus on maternal morbidity. *Bull World Health Organ*. 2013;91(10):794–6.
13. Assarag B, Dubourg D, Maaroufi A, Dujardin B, De Brouwere V. Maternal postpartum morbidity in Marrakech: what women feel what doctors diagnose? *BMC Pregnancy Childbirth*. 2013;13:225.

- 1
  - 2
  - 3
  - 4
  - 5
  - 6
  - 7
  - 8
  - 9
  - 10
  - 11
  - 12
  - 13
  - 14
  - 15
  - 16
  - 17
  - 18
  - 19
  - 20
  - 21
  - 22
  - 23
  - 24
  - 25
  - 26
  - 27
  - 28
  - 29
  - 30
  - 31
  - 32
  - 33
  - 34
  - 35
  - 36
  - 37
  - 38
  - 39
  - 40
  - 41
  - 42
  - 43
  - 44
  - 45
  - 46
  - 47
  - 48
  - 49
  - 50
  - 51
  - 52
  - 53
  - 54
  - 55
  - 56
  - 57
  - 58
  - 59
  - 60
14. McCauley M, Zafar S, van den Broek N. Maternal multimorbidity during pregnancy and after childbirth in women in low- and middle-income countries: a systematic literature review. *BMC Pregnancy Childbirth* 20, 637 (2020). <https://doi.org/10.1186/s12884-020-03303-1>
15. Cox JL, Holden JM, and Sagovsky R. 1987. Detection of postnatal depression: Development of the 10-item Edinburgh Postnatal Depression Scale. *British Journal of Psychiatry* 150:782-786.
16. Sherin KM, Sinacore JM, Li XQ, Zitter RE, Shakil A. HITS: a short domestic violence screening tool for use in a family practice setting. *Fam Med* 1998;30(7):508-12
17. World Health Organization (2010) The ASSIST project - Alcohol, Smoking and Substance Involvement Screening Test. Accessed July 2018. Available at: [http://www.who.int/substance\\_abuse/activities/assist/en/](http://www.who.int/substance_abuse/activities/assist/en/)
18. World Health Organization (2011) Haemoglobin concentrations for the diagnosis of anaemia and of severity. Geneva, Switzerland: World Health Organization. Accessed July 2018. Available at: <http://www.who.int/vmnis/indicators/haemoglobin.pdf>
19. Brown MA, Lindheimer MD, de Swiet M et al. The classification and diagnosis of the hypertensive disorders of pregnancy: statement from the International Society for the Study of Hypertension in Pregnancy (ISSHP). *Hypertension in Pregnancy* 2001; 20:(1) IX-XIV
20. Severe Sepsis and Septic Shock in Pregnancy. *Obstetrics & Gynecology*, Vol. 120, No. 3, Sept.2012, p.689-706 Balk 2014
21. World Health Organization 2015. *World Health Statistics 2015*. Geneva: World Health Organization, 2015.
22. World Health Organization 2018. *World Health Statistics: monitoring for the SDGs*. Available at: <https://apps.who.int/iris/bitstream/handle/10665/272596/9789241565585-eng.pdf> Accessed January 2021
23. Chersich MF, Kley N, Luchters SMF, Njeru C, Yard E, Othigo MJ, et al. Maternal morbidity in the first year after childbirth in Mombasa Kenya; a needs assessment. *BMC Pregnancy Childbirth*. 2009;9:51.
24. Bonet M, Brizuela V, Abalos E, Cuesta C, Baguiya A, Chamillard M, et al. Frequency and management of maternal infection in health facilities in 52 countries (GLOSS): a 1-week inception cohort study. *The Lancet Global Health*. 2020;8(5):e661-e71.
25. WHO 2017. Maternal mental health. Available at: <https://www.who.int/teams/mental-health-and-substance-use/maternal-mental-health> Accessed January 2021
26. Fisher J, Cabral de Mello M, Patel V, et al. Prevalence and determinants of common perinatal mental disorders in women in low- and lower-middle-income countries: a systematic review. *Bull World Health Organ*. 2012;90(2):139G-149G. doi:10.2471/BLT.11.091850
27. Gelaye B, Rondon MB, Araya R, Williams MA. Epidemiology of maternal depression, risk factors, and child outcomes in low-income and middle-income countries. *Lancet Psychiatry*. 2016;3(10):973-982. doi:10.1016/S2215-0366(16)30284-X

- 1
  - 2
  - 3
  - 4
  - 5
  - 6
  - 7
  - 8
  - 9
  - 10
  - 11
  - 12
  - 13
  - 14
  - 15
  - 16
  - 17
  - 18
  - 19
  - 20
  - 21
  - 22
  - 23
  - 24
  - 25
  - 26
  - 27
  - 28
  - 29
  - 30
  - 31
  - 32
  - 33
  - 34
  - 35
  - 36
  - 37
  - 38
  - 39
  - 40
  - 41
  - 42
  - 43
  - 44
  - 45
  - 46
  - 47
  - 48
  - 49
  - 50
  - 51
  - 52
  - 53
  - 54
  - 55
  - 56
  - 57
  - 58
  - 59
  - 60
28. Filippi V, Chou D, Barreix M, Say L. A new conceptual framework for maternal morbidity. *Int J Gynecol Obstet*, 2018; 141: 4-9.
29. Shrestha M, Shrestha S, Shrestha B. Domestic violence among antenatal attendees in a Kathmandu hospital and its associated factors: a cross-sectional study. *BMC Pregn Childb*. 2016;16:360. doi:10.1186/s12884-016-1166-7.
30. Zakar R, Nasrullah M, Zakar MZ, Ali H. (2016), The association of intimate partner violence with unintended pregnancy and pregnancy loss in Pakistan. *Int J Gynaecol Obstet*. 2016;133(1):26–31. doi:10.1016/j.ijgo.2015.09.009.
31. Fikree F, Jafarey S, Korejo R, Khan A, Durocher J. (2004), Pakistani obstetricians' recognition of and attitude towards domestic violence screening. *Int J Gynaecol Obstet*. 2004;87(1):59–65.
32. Nelson HD, Bougatsas C, Blazina I. Screening Women for Intimate Partner Violence: A systematic review to update U.S Preventative Risk Force Recommendations. *Ann Intern Med*. 2012;156(11):796–808.
33. Usta J, Antoun J, Ambuel B, Khawaja M. Involving the Healthcare System in Domestic Violence: What Women Want. *Ann Fam Med*. 2012;10(3):213–20. doi:10.1370/afm.1336
34. Say L, Chou D, Barbour K, Barreix M, Cecatti J, Costa M, et al. Maternal morbidity: time for reflection, recognition, and action. *Int J Gynecol Obstet*. 2018;141(S1):1–3.
35. McCauley M, Avais A, Agrawal R, Saleem S, Zafar S, van den Broek N. “Good health means being mentally, socially, emotionally and physically fit”: Women’s understanding of health and ill-health during and after pregnancy. *BMJ Open*. 2020;10:e028760. <https://doi.org/10.1136/bmjopen-2018-028760>.
36. Lange IL, Gherissi A, Chou D, Say L, Filippi V. What maternal morbidities are and what they mean for women: A thematic analysis of twenty years of qualitative research in low and lower-middle income countries. *PLoS One*. 2019;14(4):e0214199. Published 2019 Apr 11. <https://doi.org/10.1371/journal.pone.0214199>.

### List of tables and figures

**Figure 1:** Histogram of number and severity of symptoms reported, number of abnormal clinical examinations, number of abnormal investigations per stage per combined study population (n=11,454)

**Table 1:** Physical multi-morbidity (infectious, medical, obstetric) per assessment stage for all countries combined (n=11,454)

**Table 2:** Psychological and social co-morbidities of women per assessment stage for all countries combined (n= 11,454)

**Figure 2:** Percentage of women with infectious, medical/obstetric, psychological, and social morbidity per stage per combined study population (n= 11,454)

**Table 1:** Physical multi-morbidity (infectious, medical, obstetric) per assessment stage for all countries combined (n=11,454)

| Assessment stage                                             | First half of pregnancy | Second half of pregnancy | Within 24 hours of childbirth | Early postnatal | Late postnatal | Total         |
|--------------------------------------------------------------|-------------------------|--------------------------|-------------------------------|-----------------|----------------|---------------|
| Number of women <sup>a</sup>                                 | 2204                    | 2425                     | 2250                          | 2264            | 2311           | 11,454        |
|                                                              | n (%)                   | n (%)                    | n (%)                         | n (%)           | n (%)          | n (%)         |
| <b>INFECTIOUS MORBIDITY</b>                                  |                         |                          |                               |                 |                |               |
| HIV                                                          | 99 (4.5%)               | 107 (4.4%)               | 107 (4.8%)                    | 123 (5.4%)      | 116 (5.0%)     | 551 (4.8%)    |
| Malaria                                                      | 85 (3.9%)               | 73 (3.0%)                | 59 (2.6%)                     | 43 (1.9%)       | 49 (2.1%)      | 309 (2.7%)    |
| Syphilis                                                     | 36 (1.6%)               | 24 (1.0%)                | 19 (0.8%)                     | 16 (0.7%)       | 12 (0.5%)      | 107 (0.9%)    |
| Positive screening for chest infection/possible tuberculosis | 18 (0.8%)               | 24 (1.0%)                | 10 (0.4%)                     | 12 (0.5%)       | 10 (0.4%)      | 74 (0.6%)     |
| Septic Inflammatory Response Syndrome (SIRS) <sup>b</sup>    | 480 (21.8%)             | 609 (25.1%)              | 472 (21.0%)                   | 590 (26.1%)     | 492 (21.3%)    | 2,643 (23.1%) |
| <b>MEDICAL OR OBSTETRIC MORBIDITY</b>                        |                         |                          |                               |                 |                |               |
| Anaemia <sup>c</sup>                                         | 900 (40.8%)             | 1226 (50.6%)             | 1096 (48.7%)                  | 1213 (53.6%)    | 985 (42.6%)    | 5420 (47.3%)  |
| Severe anaemia                                               | 28 (1.3%)               | 47 (1.9%)                | 41 (1.8%)                     | 63 (2.8%)       | 23 (1.0%)      | 202 (1.8%)    |
| Body mass index ≤18.5 kg/m <sup>2</sup>                      | 66 (3.0%)               | 61 (2.5%)                | 34 (1.5%)                     | 68 (3.0%)       | 58 (2.5%)      | 287 (2.5%)    |
| Body mass index > 30kg/m <sup>2</sup>                        | 786 (35.6%)             | 1264 (50.2%)             | 912 (40.5%)                   | 665 (29.3%)     | 761 (32.9%)    | 4867 (42.5%)  |
| Hypertension                                                 | 33 (1.5%)               | 111 (4.6%)               | 82 (3.6%)                     | 66 (2.9%)       | 48 (2.1%)      | 340 (3.0%)    |
| Pre-eclampsia                                                | n/a                     | 51 (2.1%)                | 18 (0.8%)                     | 17 (0.7%)       | n/a            | 86 (1.2%)     |
| Urine incontinence                                           | 67 (3.0%)               | 161 (6.6%)               | 69 (3.1%)                     | 44 (1.9%)       | 76 (3.3%)      | 417 (3.6%)    |
| Antenatal haemorrhage                                        | 139 (6.3%)              | 74 (3.0%)                | n/a                           | n/a             | n/a            | 213(4.6%)     |
| <b>At least 1 medical or obstetric condition</b>             | 998 (45.3%)             | 1328 (54.8%)             | 1135 (50.4%)                  | 1245 (55.0%)    | 1017 (44.0%)   | 5723 (50.0%)  |

<sup>a</sup> Where data were missing for a condition the condition was regarded as being absent for purposes of deriving morbidities; % missing was: HIV 9.7%, malaria 5.3%, syphilis 8.9%, screening for chest infection/TB 2.0%, nutritional status 2.9%, anaemia 1.9%, blood pressure 2.3%, urine incontinence 0.5%.

<sup>b</sup> CRP was not measured at some primary level facilities in Malawi and Pakistan. Only participants for whom a CRP result was obtained are included in these statistics.

<sup>c</sup> Anaemia is defined as Hb < 11.0g/dL and severe anaemia is defined as Hb < 7.0g/dL

For peer review only



**Table 2:** Psychological and social co-morbidities of women per assessment stage for all countries combined (n= 11,454)

| Assessment stage                                                      | First half of pregnancy      | Second half of pregnancy | Within 24 hours of childbirth | Early postnatal | Late postnatal | Total        |              |
|-----------------------------------------------------------------------|------------------------------|--------------------------|-------------------------------|-----------------|----------------|--------------|--------------|
| Number of women*                                                      | 2204                         | 2425                     | 2250                          | 2264            | 2311           | 11,454       |              |
|                                                                       | n (%)                        | n (%)                    | n (%)                         | n (%)           | n (%)          | n (%)        |              |
| <b>PSYCHOLOGICAL MORBIDITY</b>                                        |                              |                          |                               |                 |                |              |              |
| <b>EDPS ≥ 10</b>                                                      | 494 (22.4%)                  | 641 (26.4%)              | 511 (22.7%)                   | 503 (22.2%)     | 469 (20.3%)    | 2618 (22.9%) |              |
| <b>Thoughts of self-harm</b>                                          | 246 (11.2%)                  | 426 (17.6%)              | 359 (16.0%)                   | 351 (15.5%)     | 362 (15.7%)    | 1744 (15.2%) |              |
| <b>EDPS ≥ 10 and/or thoughts of self-harm</b>                         | 542 (24.6%)                  | 721 (29.7%)              | 630 (28.0%)                   | 591 (26.1%)     | 575 (24.9%)    | 3059 (26.7%) |              |
| <b>SOCIAL MORBIDITY</b>                                               |                              |                          |                               |                 |                |              |              |
| <b>Domestic violence</b>                                              |                              |                          |                               |                 |                |              |              |
| <b>HITS score &gt;4</b>                                               | <b>Husband and/or family</b> | 657 (29.8%)              | 978 (40.3%)                   | 756 (33.6%)     | 770 (34.0%)    | 722 (31.2%)  | 3883 (33.9%) |
|                                                                       | <b>Husband</b>               | 475 (21.5%)              | 776 (32.0%)                   | 597 (26.5%)     | 602 (26.6%)    | 560 (24.2%)  | 3010 (26.3%) |
|                                                                       | <b>Family</b>                | 328 (14.9%)              | 444 (18.3%)                   | 358 (15.9%)     | 341 (15.1%)    | 334 (14.4%)  | 1805 (15.8%) |
| <b>HITS score &gt;10</b>                                              | <b>Husband and/or family</b> | 161 (7.3%)               | 276 (11.4%)                   | 172 (7.6%)      | 187 (8.3%)     | 170 (7.4%)   | 966 (8.4%)   |
|                                                                       | <b>Husband</b>               | 101 (4.6%)               | 223 (9.2%)                    | 109 (4.8%)      | 127 (5.6%)     | 121 (5.2%)   | 681 (6.0%)   |
|                                                                       | <b>Family</b>                | 74 (3.4%)                | 80 (3.3%)                     | 85 (3.8%)       | 79 (3.5%)      | 73 (3.2%)    | 391 (3.4%)   |
| <b>Substance misuse</b>                                               |                              |                          |                               |                 |                |              |              |
| <b>Use of alcohol, sedatives, inhalants, tobacco in last 3 months</b> | 135 (6.1%)                   | 112 (4.6%)               | 122 (5.4%)                    | 146 (6.5%)      | 157 (6.8%)     | 672 (5.9%)   |              |
| <b>Intervention required (ASSIST score &gt; 4)</b>                    | 38 (1.7%)                    | 38 (1.6%)                | 34 (1.5%)                     | 42 (1.9%)       | 20 (2.2%)      | 202 (1.8%)   |              |

ASSIST: Alcohol, Smoking and Substance Involvement Screening Test; EPDS: Edinburgh Postnatal Depression Scale; HITS: Hurt, Insulted, Threatened, Screamed at.

**Figure 1:** Histogram of number and severity of symptoms reported, number of abnormal clinical examinations, number of abnormal investigations per stage per combined study population (n=11,454)

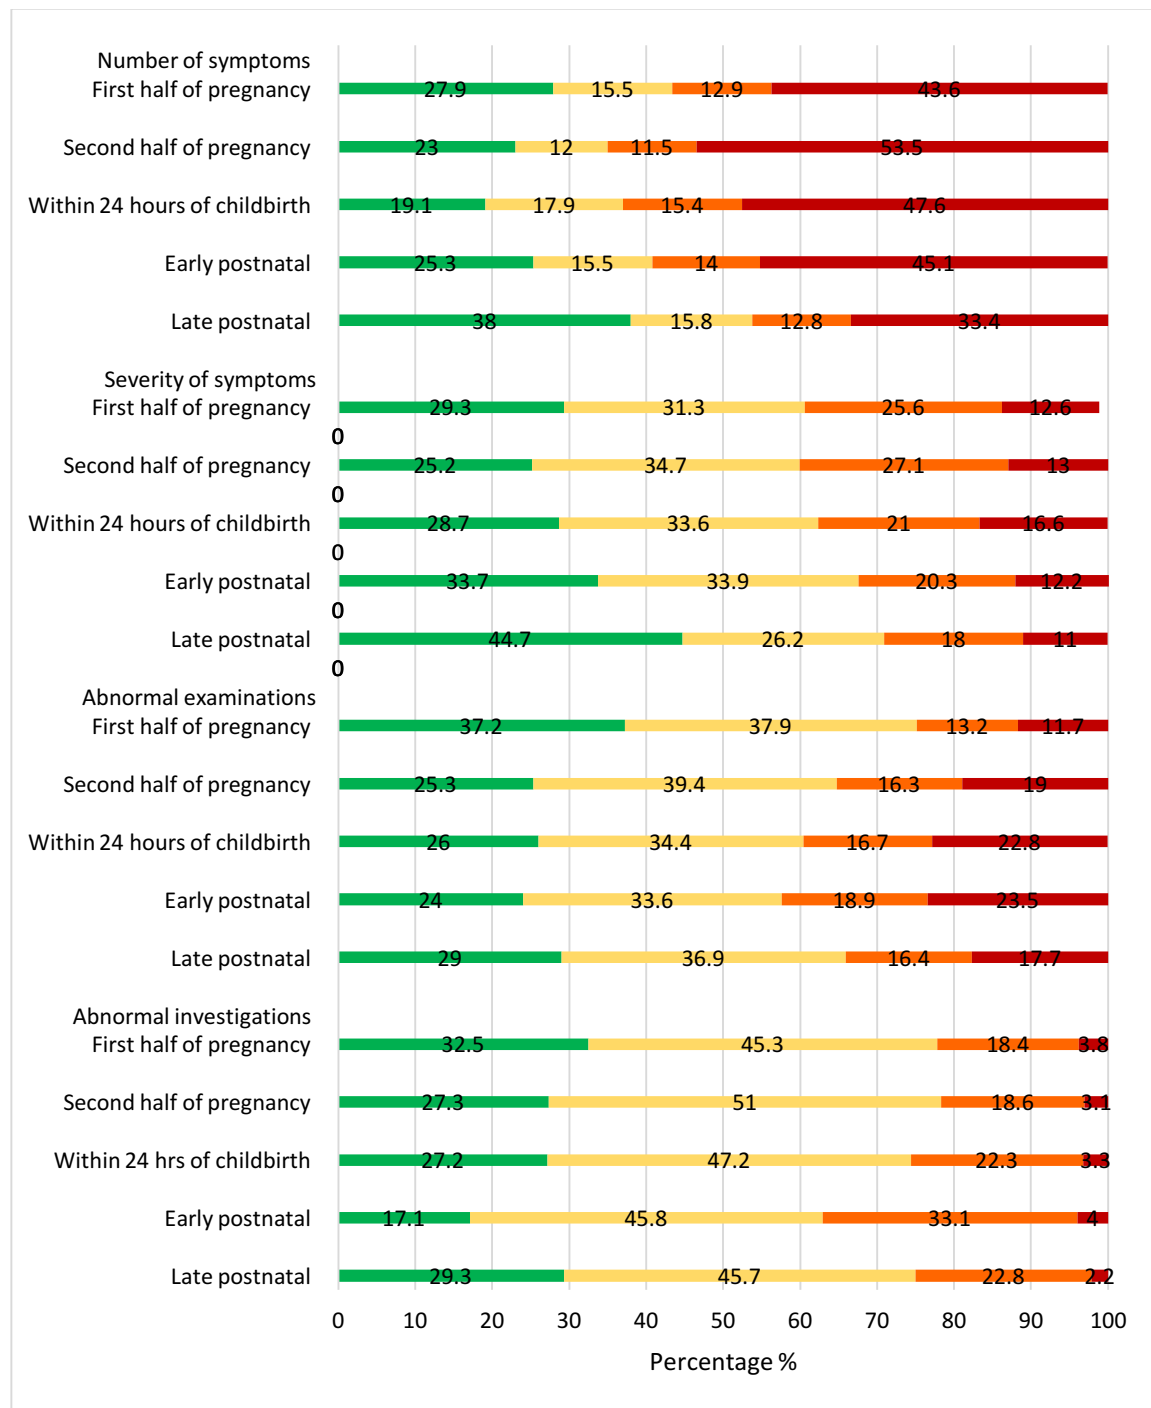

|    | Number of symptoms | Severity of symptoms | Number of abnormal examinations | Number of abnormal investigations |
|----|--------------------|----------------------|---------------------------------|-----------------------------------|
| 0  | 0                  | None, Not at all     | 0                               | 0                                 |
| 1  | 1                  | Slightly             | 1                               | 1                                 |
| 2  | 2                  | Moderately           | 2                               | 2                                 |
| ≥3 | ≥3                 | A lot                | ≥3                              | ≥3                                |

**Figure 2:** Percentage of women with infectious, medical/obstetric, psychological and social morbidity per stage per combined study population (n=11,454)



Only

## SUPPLEMENTARY TABLES

**Supplementary Table 1:** Number of women per country, per assessment stage and per healthcare facility level (n=11,454)

**Supplementary Table 2:** Infectious, medical, and obstetric morbidity identified per assessment stage for women living in India (n=2,099)

**Supplementary Table 3:** Infectious, medical, and obstetric morbidity identified per assessment stage for women living in Pakistan (n=3,287)

**Supplementary Table 4:** Infectious, medical, and obstetric morbidity identified per assessment stage for women living in Kenya (n=3,145)

**Supplementary Table 5:** Infectious, medical, and obstetric morbidity identified per assessment stage for women living in Malawi (n=2,923)

**Supplementary Table 6:** Psychological and social morbidity per assessment stage for women living in India (n=2,099)

**Supplementary Table 7:** Psychological and social morbidity of women per assessment stage for women living in for all countries combined for Pakistan (n= 3,287)

**Supplementary Table 8:** Psychological and social morbidity per assessment stage for women living in Kenya (n=3,145)

**Supplementary Table 9:** Psychological and social morbidity per assessment stage for women living in Malawi (n= 2,923)

**Supplementary Table 1:** Socio-demographic and obstetric characteristics of women by stage and for all stages combined (n=11,454)

| Assessment stage                  | First half of pregnancy | Second half of pregnancy | Within 24 hours of childbirth | Early postnatal | Late postnatal | Total  | P value |
|-----------------------------------|-------------------------|--------------------------|-------------------------------|-----------------|----------------|--------|---------|
| Number of women                   | 2,204                   | 2,425                    | 2,250                         | 2,264           | 2,311          | 11,454 |         |
|                                   | %                       | %                        | %                             | %               | %              | %      |         |
| <b>Age category (years)</b>       |                         |                          |                               |                 |                |        |         |
| <20                               | 11.0                    | 9.4                      | 11.2                          | 11.3            | 11.3           | 10.8   | 0.007   |
| 20-24                             | 28.8                    | 26.8                     | 30.6                          | 31.7            | 28.1           | 29.2   |         |
| 25-29                             | 30.7                    | 29.2                     | 29.4                          | 29.8            | 30.9           | 30.0   |         |
| 30-34                             | 15.7                    | 17.8                     | 16.4                          | 15.1            | 16.4           | 16.3   |         |
| ≥35                               | 8.0                     | 8.7                      | 6.6                           | 7.0             | 7.2            | 7.5    |         |
| <b>Parity</b>                     |                         |                          |                               |                 |                |        |         |
| 0 or 1                            | 34.8                    | 30.3                     | 35.7                          | 38.6            | 35.0           | 34.8   | <0.001  |
| 2-4                               | 54.7                    | 56.9                     | 50.8                          | 51.1            | 55.6           | 53.8   |         |
| ≥5                                | 5.9                     | 8.5                      | 6.1                           | 5.7             | 5.8            | 6.4    |         |
| <b>Marital status</b>             |                         |                          |                               |                 |                |        |         |
| Single                            | 6.2                     | 6.1                      | 4.9                           | 5.7             | 4.5            | 5.5    | 0.16    |
| Married                           | 92.7                    | 92.5                     | 94.1                          | 93.3            | 93.7           | 93.3   |         |
| <b>Socioeconomic status (SES)</b> |                         |                          |                               |                 |                |        |         |
| 1st quintile (upper)              | 13.7                    | 10.4                     | 10.8                          | 11.2            | 11.2           | 11.4   | <0.001  |
| 2nd quintile                      | 16.5                    | 15.8                     | 15.4                          | 17.4            | 16.7           | 16.3   |         |
| 3rd quintile                      | 31.0                    | 28.8                     | 30.1                          | 28.5            | 31.8           | 30.0   |         |
| 4th quintile                      | 27.5                    | 28.7                     | 29.4                          | 29.3            | 27.4           | 28.4   |         |
| 5th quintile (lower)              | 8.7                     | 12.1                     | 11.7                          | 10.6            | 10.3           | 10.7   |         |
| <b>Education level completed</b>  |                         |                          |                               |                 |                |        |         |
| None                              | 17.2                    | 18.0                     | 20.4                          | 20.9            | 19.3           | 19.2   | <0.001  |
| Primary                           | 33.1                    | 34.0                     | 35.9                          | 34.1            | 34.0           | 34.2   |         |
| Secondary                         | 30.0                    | 26.6                     | 25.7                          | 28.1            | 26.7           | 27.4   |         |
| Post-secondary                    | 15.9                    | 15.6                     | 13.1                          | 13.7            | 15.5           | 14.8   |         |

**Supplementary Table 2: Infectious, medical, and obstetric morbidity identified per assessment stage for women living in India (n=2,099)**

| Assessment stage                                          | First half of pregnancy | Second half of pregnancy | Within 24 hours of childbirth | Early postnatal    | Late postnatal     | Total               |
|-----------------------------------------------------------|-------------------------|--------------------------|-------------------------------|--------------------|--------------------|---------------------|
| Number of women <sup>a*</sup>                             | 416                     | 397                      | 423                           | 432                | 431                | 2099                |
|                                                           | n (%)                   | n (%)                    | n (%)                         | n (%)              | n (%)              | n (%)               |
| <b>INFECTIOUS MORBIDITY</b>                               |                         |                          |                               |                    |                    |                     |
| <b>Condition</b>                                          |                         |                          |                               |                    |                    |                     |
| HIV                                                       | 2 (0.5%)                | 2 (0.5%)                 | 1 (0.2%)                      | 1 (0.2%)           | 0                  | 6 (0.3%)            |
| Malaria                                                   | 0                       | 0                        | 0                             | 0                  | 2 (0.5%)           | 2 (0.1%)            |
| Syphilis                                                  | 0                       | 0                        | 0                             | 0                  | 0                  | 0                   |
| Positive screening for chest infection/possible TB        | 2 (0.5%)                | 1 (0.2%)                 | 1 (0.2%)                      | 2 (0.5%)           | 2 (0.5%)           | 8 (0.4%)            |
| Septic Inflammatory Response Syndrome (SIRS) <sup>b</sup> | 43 (10.3%)              | 66 (16.6%)               | 47 (11.1%)                    | 63 (14.6%)         | 70 (16.2%)         | 289 (13.8%)         |
| <b>MEDICAL OR OBSTETRIC MORBIDITY</b>                     |                         |                          |                               |                    |                    |                     |
| <b>Condition</b>                                          |                         |                          |                               |                    |                    |                     |
| Anaemia <sup>c</sup>                                      | 184 (44.2%)             | 228 (57.4%)              | 282 (66.7%)                   | 309 (71.5%)        | 265 (61.5%)        | 1268 (60.4%)        |
| Severe anaemia                                            | 4 (1.0%)                | 13 (3.3%)                | 12 (2.8%)                     | 17 (3.9%)          | 5 (1.2%)           | 51 (2.4%)           |
| Hypertension                                              | 2 (0.5%)                | 16 (4.0%)                | 7(1.6%)                       | 7 (1.6%)           | 1 (0.2%)           | 33 (1.6%)           |
| Low BMI (<18.5 kg/m <sup>2</sup> )                        | 30 (7.4%)               | 9 (2.3%)                 | 9 (2.1%)                      | 9 (2.1%)           | 10 (2.3%)          | 67 (3.2%)           |
| High BMI (> 30kg/m <sup>2</sup> )                         | 55 (13.6%)              | 153 (38.9%)              | 109 (26.0%)                   | 97 (22.5%)         | 107 (25%)          | 521 (25.1)          |
| Pre-eclampsia                                             | n/a                     | 0                        | 0                             | 1 (0.2%)           | n/a                | 1 (0.1%)            |
| Urine incontinence                                        | 13 (3.1%)               | 21 (5.3%)                | 0                             | 2 (0.5%)           | 0                  | 36 (1.7%)           |
| Antenatal haemorrhage                                     | 0                       | 0                        | n/a                           | n/a                | n/a                | 0                   |
| <b>At least 1 medical or obstetric condition</b>          | <b>202 (48.6%)</b>      | <b>254 (64.0%)</b>       | <b>285 (67.4%)</b>            | <b>311 (72.0%)</b> | <b>266 (61.7%)</b> | <b>1318 (62.8%)</b> |

<sup>a</sup> Where data were missing for a condition the condition was regarded as being absent for purposes of deriving morbidities

<sup>b</sup> CRP was not measured at some primary level facilities in Malawi and Pakistan. Only participants for whom a CRP result was obtained are included in these statistics.

<sup>c</sup> Anaemia is defined as Hb< 11.0g/dL and severe anaemia is defined as Hb<7g/dL

**Supplementary Table 3: Infectious, medical, and obstetric morbidity identified per assessment stage for women living in Pakistan (n=3,287)**

| Assessment stage                                          | First half of pregnancy | Second half of pregnancy | Within 24 hours of childbirth | Early postnatal    | Late postnatal     | Total               |
|-----------------------------------------------------------|-------------------------|--------------------------|-------------------------------|--------------------|--------------------|---------------------|
| Number of women <sup>a*</sup>                             | 607                     | 768                      | 654                           | 618                | 640                | 3287                |
|                                                           | n (%)                   | n (%)                    | n (%)                         | n (%)              | n (%)              | n (%)               |
| <b>INFECTIOUS MORBIDITY</b>                               |                         |                          |                               |                    |                    |                     |
| <b>Condition</b>                                          |                         |                          |                               |                    |                    |                     |
| HIV                                                       | 0                       | 1 (0.1%)                 | 7 (1.1%)                      | 2 (0.3%)           | 1 (0.2%)           | 11 (0.3%)           |
| Malaria                                                   | 0                       | 0                        | 0                             | 1 (0.2%)           | 0                  | 1 (0.03%)           |
| Syphilis                                                  | 0                       | 0                        | 0                             | 0                  | 0                  | 0                   |
| Positive screening for chest infection/possible TB        | 7 (1.1%)                | 11 (1.4%)                | 2 (0.3%)                      | 2 (0.3%)           | 3 (0.5%)           | 25 (0.8%)           |
| Septic Inflammatory Response Syndrome (SIRS) <sup>b</sup> | 67 (11.0%)              | 122 (15.9%)              | 54 (8.3%)                     | 70 (11.3%)         | 55 (8.6%)          | 368 (11.2%)         |
| <b>MEDICAL OR OBSTETRIC MORBIDITY</b>                     |                         |                          |                               |                    |                    |                     |
| <b>Condition</b>                                          |                         |                          |                               |                    |                    |                     |
| Anaemia <sup>c</sup>                                      | 389 (64.1%)             | 590 (76.8%)              | 435 (66.5%)                   | 437 (70.7%)        | 375 (58.6%)        | 2226 (67.7%)        |
| Severe anaemia                                            | 9 (1.5%)                | 27 (3.5%)                | 18 (2.8%)                     | 22 (3.6%)          | 5 (0.8%)           | 81 (2.5%)           |
| Body mass index ≤18.5 kg/m <sup>2</sup>                   | 37 (6.2%)               | 16(2.2%)                 | 7(1.1%)                       | 11 (1.8%)          | 10 (1.6%)          | 81 (2.5%)           |
| High BMI (> 30kg/m <sup>2</sup> )                         | 289 (48.5%)             | 470 (63.2%)              | 306 (48.6%)                   | 325 (53.7%)        | 307 (49.8%)        | 1697 (53.2%)        |
| Hypertension                                              | 18 (3.0%)               | 67 (8.7%)                | 54 (8.3%)                     | 40 (6.5%)          | 27 (4.2%)          | 206 (6.3%)          |
| Pre-eclampsia                                             | n/a                     | 26 (3.4%)                | 8 (1.2%)                      | 6 (1.0%)           | n/a                | 40 (2.0%)           |
| Urine incontinence                                        | 40 (6.6%)               | 106 (13.8%)              | 64 (9.8%)                     | 39 (6.3%)          | 65 (10.2%)         | 314 (9.5%)          |
| Antenatal haemorrhage                                     | 80 (13.2%)              | 60 (7.8%)                | n/a                           | n/a                | n/a                | 140 (10.2%)         |
| <b>At least 1 medical or obstetric condition</b>          | <b>422 (69.5%)</b>      | <b>619 (80.6%)</b>       | <b>455 (69.6%)</b>            | <b>455 (73.6%)</b> | <b>388 (60.6%)</b> | <b>2339 (71.2%)</b> |

<sup>a</sup> Where data were missing for a condition the condition was regarded as being absent for purposes of deriving morbidities

<sup>b</sup> CRP was not measured at some primary level facilities in Malawi and Pakistan. Only participants for whom a CRP result was obtained are included in these statistics.

<sup>c</sup> Anaemia is defined as Hb< 11.0g/dL and severe anaemia is defined as Hb<7g/dL

**Supplementary Table 4: Infectious, medical, and obstetric morbidity identified per assessment stage for women living in Kenya (n=3,145)**

| Assessment stage | First half of pregnancy | Second half of pregnancy | Within 24 hours of childbirth | Early postnatal | Late postnatal | Total |
|------------------|-------------------------|--------------------------|-------------------------------|-----------------|----------------|-------|
|------------------|-------------------------|--------------------------|-------------------------------|-----------------|----------------|-------|

|                                                           |                    |                    |                    |                    |                    |                    |
|-----------------------------------------------------------|--------------------|--------------------|--------------------|--------------------|--------------------|--------------------|
| Number of women <sup>a*</sup>                             | 592                | 684                | 592                | 620                | 657                | 3145               |
|                                                           | <b>n (%)</b>       | <b>n (%)</b>       | <b>n (%)</b>       | <b>n (%)</b>       | <b>n (%)</b>       | <b>n (%)</b>       |
| <b>INFECTIOUS MORBIDITY</b>                               |                    |                    |                    |                    |                    |                    |
| <b>Condition</b>                                          |                    |                    |                    |                    |                    |                    |
| HIV                                                       | 24 (4.0%)          | 19 (2.8%)          | 24 (4.0%)          | 25 (4.0%)          | 25 (3.8%)          | 117 (3.7%)         |
| Malaria                                                   | 2 (0.3%)           | 2 (0.3%)           | 1 (0.2%)           | 2 (0.3%)           | 0                  | 7 (0.2%)           |
| Syphilis                                                  | 2 (0.3%)           | 2 (0.3%)           | 1 (0.2%)           | 0                  | 3 (0.5%)           | 8 (0.2%)           |
| Positive screening for chest infection/ possible TB       | 3 (0.5%)           | 6 (0.9%)           | 5 (0.8%)           | 3 (0.5%)           | 5 (0.8%)           | 22 (0.7%)          |
| Septic Inflammatory Response Syndrome (SIRS) <sup>b</sup> | 206 (34.8%)        | 267 (39.0%)        | 197 (33.3%)        | 278 (44.8%)        | 199 (30.3%)        | 1147 (36.5%)       |
| <b>MEDICAL OR OBSTETRIC MORBIDITY</b>                     |                    |                    |                    |                    |                    |                    |
| <b>Condition</b>                                          |                    |                    |                    |                    |                    |                    |
| Anaemia <sup>c</sup>                                      | 102 (17.2%)        | 163 (23.8%)        | 146 (24.7%)        | 204 (32.9%)        | 130 (19.8%)        | 745 (23.7%)        |
| Severe anaemia                                            | 7 (1.2%)           | 4 (0.6%)           | 7 (1.2%)           | 12 (1.9%)          | 12 (1.8%)          | 65 (2.1%)          |
| Body mass index $\leq 18.5$ kg/m <sup>2</sup>             | 18 (3.1%)          | 8 (1.2%)           | 10 (1.7%)          | 7 (1.2%)           | 3 (0.5%)           | 46 (1.5%)          |
| High BMI (> 30kg/m <sup>2</sup> )                         | 278 (47.7%)        | 404 (59.8%)        | 328 (56.2%)        | 350 (57.6%)        | 325 (50.3%)        | 1685 (54.4%)       |
| Hypertension                                              | 7 (1.2%)           | 19 (2.8%)          | 13 (2.2%)          | 16 (2.6%)          | 15 (2.3%)          | 70 (2.2%)          |
| Pre-eclampsia                                             | n/a                | 8 (1.2%)           | 0                  | 4 (0.6%)           | n/a                | 12 (0.6%)          |
| Urine incontinence                                        | 12 (2.0%)          | 23 (3.4%)          | 2 (0.3%)           | 3 (0.5%)           | 9 (1.4%)           | 49 (1.6%)          |
| Antenatal haemorrhage                                     | 54 (9.1%)          | 12 (1.7%)          | n/a                | n/a                | n/a                | 66 (5.2%)          |
| <b>At least 1 medical or obstetric condition</b>          | <b>142 (24.0%)</b> | <b>197 (28.8%)</b> | <b>156 (26.3%)</b> | <b>214 (34.5%)</b> | <b>143 (21.8%)</b> | <b>852 (27.1%)</b> |

<sup>a</sup> Where data were missing for a condition the condition was regarded as being absent for purposes of deriving morbidities

<sup>b</sup> CRP was not measured at some primary level facilities in Malawi and Pakistan. Only participants for whom a CRP result was obtained are included in these statistics.

<sup>c</sup> Anaemia is defined as Hb < 11.0g/dL and severe anaemia is defined as Hb < 7g/dL



**Supplementary Table 5: Infectious, medical, and obstetric morbidity identified per assessment stage for women living in Malawi (n=2923)**

| Assessment stage                                          | First half of pregnancy | Second half of pregnancy | Within 24 hours of childbirth | Early postnatal    | Late postnatal     | Total               |
|-----------------------------------------------------------|-------------------------|--------------------------|-------------------------------|--------------------|--------------------|---------------------|
| Number of women <sup>a</sup>                              | 589                     | 576                      | 581                           | 594                | 583                | 2923                |
|                                                           | n (%)                   | n (%)                    | n (%)                         | n (%)              | n (%)              | n (%)               |
| <b>INFECTIOUS MORBIDITY</b>                               |                         |                          |                               |                    |                    |                     |
| HIV                                                       | 73 (12.4%)              | 85 (14.8%)               | 75 (12.9%)                    | 95(16.0%)          | 90(15.4%)          | 418 (14.3%)         |
| Malaria                                                   | 83 (14.1%)              | 71 (12.3%)               | 58 (10.0%)                    | 40 (6.7%)          | 47 (8.1%)          | 299 (10.2%)         |
| Syphilis                                                  | 34 (5.8%)               | 22 (3.8%)                | 18 (3.1%)                     | 16 (2.7%)          | 9 (1.5%)           | 99 (3.4%)           |
| Positive screening for chest infection/ possible TB       | 6 (1.0%)                | 6 (1.0%)                 | 2 (0.3%)                      | 5 (0.8%)           | 0                  | 19 (0.7%)           |
| Septic Inflammatory Response Syndrome (SIRS) <sup>b</sup> | 164 (27.8%)             | 154 26.7(%)              | 174 (30.0%)                   | 179 (30.1%)        | 168 (28.8%)        | 839 (28.7%)         |
| <b>MEDICAL OR OBSTETRIC MORBIDITY</b>                     |                         |                          |                               |                    |                    |                     |
| Anaemia <sup>c</sup>                                      | 225 (38.2%)             | 245 (42.5%)              | 233 (40.1%)                   | 263 (44.3%)        | 215 (36.9%)        | 1181 (40.4%)        |
| Severe anaemia                                            | 8 (1.4%)                | 3 (0.5%)                 | 4 (0.7%)                      | 12 (2.0%)          | 6 (1.0%)           | 33 (1.1%)           |
| Body mass index ≤18.5 kg/m <sup>2</sup>                   | 18 (3.1%)               | 7 (1.2%)                 | 19 (3.3%)                     | 22 (3.7%)          | 22 (3.8%)          | 88 (3.0%)           |
| High BMI (> 30kg/m <sup>2</sup> )                         | 164 (28.3%)             | 237 (41.6%)              | 169 (29.2%)                   | 186 (31.5%)        | 208 (36.1%)        | 964 (33.3%)         |
| Hypertension                                              | 6 (1.0%)                | 9 (1.6%)                 | 8 (1.4%)                      | 3 (0.5%)           | 5(0.9%)            | 31 (1.1%)           |
| Pre-eclampsia                                             | n/a                     | 17 (2.9%)                | 10 (1.7%)                     | 6 (1.0%)           | n/a                | 49 (2.8%)           |
| Urine incontinence                                        | 2 (0.3%)                | 11 (1.9%)                | 3 (0.5%)                      | 0                  | 2 (0.3%)           | 18 (0.6%)           |
| Antenatal haemorrhage                                     | 5 (0.9%)                | 2 (0.4%)                 | n/a                           | n/a                | n/a                | 7 (0.6%)            |
| <b>At least one medical or obstetric condition</b>        | <b>232 (39.4%)</b>      | <b>258 (44.8%)</b>       | <b>239 (41.1%)</b>            | <b>265 (44.6%)</b> | <b>220 (37.7%)</b> | <b>1214 (41.5%)</b> |

<sup>a</sup> Where data were missing for a condition the condition was regarded as being absent for purposes of deriving morbidities

<sup>b</sup> CRP was not measured at some primary level facilities in Malawi and Pakistan. Only participants for whom a CRP result was obtained are included in these statistics.

<sup>c</sup> Anaemia is defined as Hb< 11.0g/dL and severe anaemia is defined as Hb<7g/dL

**Supplementary Table 6: Psychological and social morbidity per assessment stage for women living in India (number of women assessed n=2099)**

| stage                                                                    | First half of pregnancy | Second half of pregnancy | Within 24 hours of childbirth | Early postnatal | Late postnatal | Total       |             |
|--------------------------------------------------------------------------|-------------------------|--------------------------|-------------------------------|-----------------|----------------|-------------|-------------|
| Number of women*                                                         | 416                     | 397                      | 423                           | 432             | 431            | 2099        |             |
|                                                                          | n %                     | n %                      | n %                           | n %             | n %            | n %         |             |
| <b>PSYCHOLOGICAL MORBIDITY</b>                                           |                         |                          |                               |                 |                |             |             |
| <b>EDPS ≥ 10</b>                                                         | 45 (10.8%)              | 103 (25.9%)              | 86 (20.3%)                    | 86 (19.9%)      | 84 (19.5%)     | 404 (19.2%) |             |
| <b>Thoughts of self-harm</b>                                             | 40 (9.6%)               | 79 (19.9%)               | 72 (17.0%)                    | 71 (16.4%)      | 66 (15.3%)     | 328 (15.6%) |             |
| <b>EDPS ≥ 10 and/or thoughts of self-harm</b>                            | 60 (14.4%)              | 116 (29.2%)              | 102 (24.1%)                   | 99 (22.9%)      | 95 (22.0%)     | 472 (22.5%) |             |
| <b>SOCIAL MORBIDITY</b>                                                  |                         |                          |                               |                 |                |             |             |
| <b>Domestic violence</b>                                                 |                         |                          |                               |                 |                |             |             |
| <b>HITS score &gt;4</b>                                                  | Husband and/or family   | 159 (38.2%)              | 173 (43.6%)                   | 153 (36.2%)     | 189 (43.7%)    | 159 (36.9%) | 833 (39.7%) |
|                                                                          | Husband                 | 154 (37.0%)              | 164 (41.3%)                   | 152 (35.9%)     | 185 (42.8%)    | 155 (36.0%) | 810 (38.6%) |
|                                                                          | Family                  | 35 (8.4%)                | 67 (16.9%)                    | 28 (6.6%)       | 52 (12.0%)     | 29 (6.7%)   | 211 (10.0%) |
| <b>HITS score &gt;10</b>                                                 | Husband and/or family   | 23 (5.5%)                | 36 (9.1%)                     | 18 (4.3%)       | 33 (7.6%)      | 17 (3.9%)   | 127 (6.0%)  |
|                                                                          | Husband                 | 19 (4.6%)                | 27 (6.8%)                     | 16 (3.8%)       | 30 (6.9%)      | 15 (3.5%)   | 107 (5.1%)  |
|                                                                          | Family                  | 8 (1.9%)                 | 22 (5.5%)                     | 3 (0.7%)        | 15 (3.5%)      | 8 (1.9%)    | 56 (2.7%)   |
| <b>Substance misuse</b>                                                  |                         |                          |                               |                 |                |             |             |
| <b>Use of alcohol, sedatives, inhalants, or tobacco in last 3 months</b> | 6 (1.4%)                | 9 (2.3%)                 | 4 (0.9%)                      | 12 (2.8%)       | 5 (1.2%)       | 36 (1.7%)   |             |
| <b>Intervention required</b>                                             | 4 (1.0%)                | 7 (1.8%)                 | 0                             | 5 (1.2%)        | 1 (0.2%)       | 17 (0.8%)   |             |

ASSIST: Alcohol, Smoking and Substance Involvement Screening Test; EPDS: Edinburgh Postnatal Depression Scale; HITS: Hurt, Insulted, Threatened, Screamed at.

**Supplementary Table 7: Psychological and social morbidity of women per assessment stage for women living in for all countries combined for Pakistan (number of women assessed n= 3287)**

| stage                                                                    | First half of pregnancy | Second half of pregnancy | Within 24 hours of childbirth | Early postnatal | Late postnatal | Total           |                 |
|--------------------------------------------------------------------------|-------------------------|--------------------------|-------------------------------|-----------------|----------------|-----------------|-----------------|
| Number of women*                                                         | 607                     | 768                      | 654                           | 618             | 640            | 3287            |                 |
|                                                                          | n %                     | n %                      | n %                           | n %             | n %            | n %             |                 |
| <b>PSYCHOLOGICAL MORBIDITY</b>                                           |                         |                          |                               |                 |                |                 |                 |
| <b>EDPS ≥ 10</b>                                                         | 277<br>(45.6%)          | 349<br>(45.4%)           | 243<br>(37.2%)                | 256<br>(41.4%)  | 243<br>(38.0%) | 1368<br>(41.6%) |                 |
| <b>Thoughts of self-harm</b>                                             | 130<br>(21.4%)          | 242<br>(31.5%)           | 194<br>(29.7%)                | 200<br>(32.4%)  | 212<br>(33.1%) | 978<br>(29.7%)  |                 |
| <b>EDPS ≥ 10 and/or thoughts of self-harm</b>                            | 297<br>(48.9%)          | 379<br>(49.3%)           | 323<br>(49.4%)                | 308<br>(49.8%)  | 315<br>(49.2%) | 1622<br>(49.3%) |                 |
| <b>SOCIAL MORBIDITY</b>                                                  |                         |                          |                               |                 |                |                 |                 |
| <b>Domestic violence</b>                                                 |                         |                          |                               |                 |                |                 |                 |
| <b>HITS score &gt;4</b>                                                  | Husband and/or family   | 308<br>(50.7%)           | 464<br>(60.4%)                | 371<br>(56.7%)  | 382<br>(61.8%) | 314<br>(49.1%)  | 1839<br>(55.9%) |
|                                                                          | Husband                 | 183<br>(30.1%)           | 340<br>(44.3%)                | 255<br>(39.0%)  | 255<br>(41.3%) | 195<br>(30.5%)  | 1228<br>(37.4%) |
|                                                                          | Family                  | 197<br>(32.4%)           | 246<br>(32.0%)                | 217<br>(33.2%)  | 199<br>(32.2%) | 184<br>(28.7%)  | 1043<br>(31.7%) |
| <b>HITS score &gt;10</b>                                                 | Husband and/or family   | 109<br>(18.0%)           | 185<br>(24.1%)                | 103<br>(15.7%)  | 115<br>(18.6%) | 104<br>(16.2%)  | 616<br>(18.7%)  |
|                                                                          | Husband                 | 64 (10.5%)               | 150<br>(19.5%)                | 59 (9.0%)       | 70 (11.3%)     | 68<br>(10.6%)   | 411<br>(12.5%)  |
|                                                                          | Family                  | 50 (8.2%)                | 47 (6.1%)                     | 55 (8.4%)       | 47 (7.6%)      | 47 (7.3%)       | 246<br>(7.5%)   |
| <b>Substance misuse</b>                                                  |                         |                          |                               |                 |                |                 |                 |
| <b>Use of alcohol, sedatives, inhalants, or tobacco in last 3 months</b> | 61 (10.0%)              | 53 (6.9%)                | 45 (6.9%)                     | 74 (12.0%)      | 60 (9.4%)      | 293<br>(8.9%)   |                 |
| <b>Intervention required</b>                                             | 7 (1.1%)                | 13 (1.7%)                | 5 (0.8%)                      | 12 (1.9%)       | 20 (3.1%)      | 57 (1.7%)       |                 |

ASSIST: Alcohol, Smoking and Substance Involvement Screening Test; EPDS: Edinburgh Postnatal Depression Scale; HITS: Hurt, Insulted, Threatened, Screamed at.

**Supplementary Table 8: Psychological and social morbidity per assessment stage for women living in Kenya (n=3145)**

| Assessment stage                                                         | First half of pregnancy | Second half of pregnancy | Within 24 hours of childbirth | Early postnatal | Late postnatal | Total              |             |
|--------------------------------------------------------------------------|-------------------------|--------------------------|-------------------------------|-----------------|----------------|--------------------|-------------|
| Number of women*                                                         | 592                     | 684                      | 592                           | 620             | 657            | 3145               |             |
|                                                                          | n %                     | n %                      | n %                           | n %             | n %            | n %                |             |
| <b>PSYCHOLOGICAL MORBIDITY</b>                                           |                         |                          |                               |                 |                |                    |             |
| <b>EDPS ≥ 10</b>                                                         | 86 (14.5%)              | 101 (14.8%)              | 81 (13.7%)                    | 72 (11.6%)      | 49 (7.5%)      | 389 (12.4%)        |             |
| <b>Thoughts of self-harm</b>                                             | 28 (4.7%)               | 47 (6.9%)                | 29 (4.9%)                     | 20 (3.2%)       | 19 (2.9%)      | 143 (4.5%)         |             |
| <b>EDPS ≥ 10 and/or thoughts of self-harm</b>                            | 94 (15.9%)              | 126 (18.4%)              | 95 (16.0%)                    | 84 (13.5%)      | 60 (9.1%)      | <b>459 (14.6%)</b> |             |
| <b>SOCIAL MORBIDITY</b>                                                  |                         |                          |                               |                 |                |                    |             |
| <b>Domestic violence</b>                                                 |                         |                          |                               |                 |                |                    |             |
| <b>HITS score &gt;4</b>                                                  | Husband and/or family   | 99 (16.7%)               | 201 (29.4%)                   | 130 (22.0%)     | 105 (17.0%)    | 144 (21.9%)        | 679 (21.6%) |
|                                                                          | Husband                 | 78 (13.2%)               | 176 (25.7%)                   | 108 (18.2%)     | 88 (14.2%)     | 125 (19.0%)        | 575 (18.3%) |
|                                                                          | Family                  | 29 (4.9%)                | 51 (7.5%)                     | 35 (5.9%)       | 24 (3.9%)      | 47 (7.1%)          | 186 (5.9%)  |
| <b>HITS score &gt;10</b>                                                 | Husband and/or family   | 9 (1.5%)                 | 26 (3.8%)                     | 22 (3.7%)       | 12 (1.9%)      | 17 (2.6%)          | 86 (2.7%)   |
|                                                                          | Husband                 | 8 (1.3%)                 | 24 (3.5%)                     | 18 (3.0%)       | 10 (1.6%)      | 15 (2.3%)          | 75 (2.4%)   |
|                                                                          | Family                  | 2 (0.3%)                 | 2 (0.3%)                      | 6 (1.0%)        | 2 (0.3%)       | 2 (0.3%)           | 14 (0.4%)   |
| <b>Substance misuse</b>                                                  |                         |                          |                               |                 |                |                    |             |
| <b>Use of alcohol, sedatives, inhalants, or tobacco in last 3 months</b> | 40 (6.8%)               | 27 (3.9%)                | 42 (7.1%)                     | 37 (6.0%)       | 63 (9.6%)      | 209 (6.6%)         |             |
| <b>Intervention required</b>                                             | 9 (1.5%)                | 6 (0.9%)                 | 9 (1.5%)                      | 8 (1.3%)        | 14 (2.1%)      | 46 (1.5%)          |             |

ASSIST: Alcohol, Smoking and Substance Involvement Screening Test; EPDS: Edinburgh Postnatal Depression Scale; HITS: Hurt, Insulted, Threatened, Screamed at.

**Supplementary Table 9: Psychological and social morbidity per assessment stage for women living in Malawi (number of women assessed n= 2923)**

| Assessment stage                                                         | First half of pregnancy | Second half of pregnancy | Within 24 hours of childbirth | Early postnatal | Late postnatal | Total       |             |
|--------------------------------------------------------------------------|-------------------------|--------------------------|-------------------------------|-----------------|----------------|-------------|-------------|
| Number of women*                                                         | 589                     | 576                      | 581                           | 594             | 583            | 2923        |             |
|                                                                          | n %                     | n %                      | n %                           | n %             | n %            | n %         |             |
| <b>PSYCHOLOGICAL MORBIDITY</b>                                           |                         |                          |                               |                 |                |             |             |
| <b>EDPS ≥ 10</b>                                                         | 86 (14.6%)              | 88 (15.3%)               | 101 (17.4%)                   | 89 (15.0%)      | 93 (15.9%)     | 457 (15.6%) |             |
| <b>Thoughts of self-harm</b>                                             | 48 (8.2%)               | 58 (10.1%)               | 64 (11.0%)                    | 60 (10.1%)      | 65 (11.1%)     | 295 (10.1%) |             |
| <b>EDPS ≥ 10 and/or thoughts of self-harm</b>                            | 91 (15.4%)              | 100 (17.4%)              | 110 (18.9%)                   | 100 (16.8%)     | 105 (18.0%)    | 506 (17.3%) |             |
| <b>SOCIAL MORBIDITY</b>                                                  |                         |                          |                               |                 |                |             |             |
| <b>Domestic violence</b>                                                 |                         |                          |                               |                 |                |             |             |
| <b>HITS score &gt;4</b>                                                  | Husband and/or family   | 91 (15.4%)               | 140 (24.3%)                   | 102 (17.6%)     | 94 (15.8%)     | 105 (18.0%) | 532 (18.2%) |
|                                                                          | Husband                 | 60 (10.2%)               | 96 (16.7%)                    | 82 (14.1%)      | 74 (12.5%)     | 85 (14.6%)  | 397 (13.6%) |
|                                                                          | Family                  | 67 (11.4%)               | 80 (13.9%)                    | 78 (13.4%)      | 66 (11.1%)     | 74 (12.7%)  | 365 (12.5%) |
| <b>HITS score &gt;10</b>                                                 | Husband and/or family   | 20 (3.4%)                | 29 (5.0%)                     | 29 (5.0%)       | 27 (4.5%)      | 32 (5.5%)   | 137 (4.7%)  |
|                                                                          | Husband                 | 10 (1.7%)                | 22 (3.8%)                     | 16 (2.7%)       | 17 (2.9%)      | 23 (3.9%)   | 88 (3.0%)   |
|                                                                          | Family                  | 14 (2.4%)                | 9 (1.6%)                      | 21 (3.6%)       | 15 (2.5%)      | 16 (2.7%)   | 75 (2.6%)   |
| <b>Substance misuse</b>                                                  |                         |                          |                               |                 |                |             |             |
| <b>Use of alcohol, sedatives, inhalants, or tobacco in last 3 months</b> | 28 (4.7%)               | 23 (4.0%)                | 31 (5.3%)                     | 23 (3.9%)       | 29 (5.0%)      | 134 (4.6%)  |             |
| <b>Intervention required</b>                                             | 18 (3.1%)               | 12 (2.1%)                | 20 (3.4%)                     | 17 (2.9%)       | 15 (2.6%)      | 82 (2.8%)   |             |

ASSIST: Alcohol, Smoking and Substance Involvement Screening Test; EPDS: Edinburgh Postnatal Depression Scale; HITS: Hurt, Insulted, Threatened, Screamed at.

STROBE Statement—Checklist of items that should be included in reports of *cross-sectional studies*

|                              | Item No | Recommendation                                                                                                                                                                                    | Page No |
|------------------------------|---------|---------------------------------------------------------------------------------------------------------------------------------------------------------------------------------------------------|---------|
| <b>Title and abstract</b>    | 1       | (a) Indicate the study's design with a commonly used term in the title or the abstract                                                                                                            | 1       |
|                              |         | (b) Provide in the abstract an informative and balanced summary of what was done and what was found                                                                                               | 3       |
| <b>Introduction</b>          |         |                                                                                                                                                                                                   |         |
| Background/rationale         | 2       | Explain the scientific background and rationale for the investigation being reported                                                                                                              | 6       |
| Objectives                   | 3       | State specific objectives, including any prespecified hypotheses                                                                                                                                  | 7       |
| <b>Methods</b>               |         |                                                                                                                                                                                                   |         |
| Study design                 | 4       | Present key elements of study design early in the paper                                                                                                                                           | 7       |
| Setting                      | 5       | Describe the setting, locations, and relevant dates, including periods of recruitment, exposure, follow-up, and data collection                                                                   | 7       |
| Participants                 | 6       | (a) Give the eligibility criteria, and the sources and methods of selection of participants                                                                                                       | 7       |
| Variables                    | 7       | Clearly define all outcomes, exposures, predictors, potential confounders, and effect modifiers. Give diagnostic criteria, if applicable                                                          | 8       |
| Data sources/<br>measurement | 8*      | For each variable of interest, give sources of data and details of methods of assessment (measurement). Describe comparability of assessment methods if there is more than one group              | 8       |
| Bias                         | 9       | Describe any efforts to address potential sources of bias                                                                                                                                         | 7       |
| Study size                   | 10      | Explain how the study size was arrived at                                                                                                                                                         | 7       |
| Quantitative variables       | 11      | Explain how quantitative variables were handled in the analyses. If applicable, describe which groupings were chosen and why                                                                      | 8       |
| Statistical methods          | 12      | (a) Describe all statistical methods, including those used to control for confounding                                                                                                             | 9       |
|                              |         | (b) Describe any methods used to examine subgroups and interactions                                                                                                                               | 9       |
|                              |         | (c) Explain how missing data were addressed                                                                                                                                                       | 9       |
|                              |         | (d) If applicable, describe analytical methods taking account of sampling strategy                                                                                                                | 9       |
|                              |         | (e) Describe any sensitivity analyses                                                                                                                                                             | 9       |
| <b>Results</b>               |         |                                                                                                                                                                                                   |         |
| Participants                 | 13*     | (a) Report numbers of individuals at each stage of study—eg numbers potentially eligible, examined for eligibility, confirmed eligible, included in the study, completing follow-up, and analysed | 10      |
|                              |         | (b) Give reasons for non-participation at each stage                                                                                                                                              | 10      |

|                          |     |                                                                                                                                                                                                              |    |
|--------------------------|-----|--------------------------------------------------------------------------------------------------------------------------------------------------------------------------------------------------------------|----|
|                          |     | (c) Consider use of a flow diagram                                                                                                                                                                           | 10 |
| Descriptive data         | 14* | (a) Give characteristics of study participants (eg demographic, clinical, social) and information on exposures and potential confounders                                                                     | 10 |
|                          |     | (b) Indicate number of participants with missing data for each variable of interest                                                                                                                          | 10 |
| Outcome data             | 15* | Report numbers of outcome events or summary measures                                                                                                                                                         | 10 |
| Main results             | 16  | (a) Give unadjusted estimates and, if applicable, confounder-adjusted estimates and their precision (eg, 95% confidence interval). Make clear which confounders were adjusted for and why they were included | 11 |
|                          |     | (b) Report category boundaries when continuous variables were categorized                                                                                                                                    | 11 |
|                          |     | (c) If relevant, consider translating estimates of relative risk into absolute risk for a meaningful time period                                                                                             | 11 |
| Other analyses           | 17  | Report other analyses done—eg analyses of subgroups and interactions, and sensitivity analyses                                                                                                               | 12 |
| <b>Discussion</b>        |     |                                                                                                                                                                                                              |    |
| Key results              | 18  | Summarise key results with reference to study objectives                                                                                                                                                     | 13 |
| Limitations              | 19  | Discuss limitations of the study, taking into account sources of potential bias or imprecision. Discuss both direction and magnitude of any potential bias                                                   | 14 |
| Interpretation           | 20  | Give a cautious overall interpretation of results considering objectives, limitations, multiplicity of analyses, results from similar studies, and other relevant evidence                                   | 15 |
| Generalisability         | 21  | Discuss the generalisability (external validity) of the study results                                                                                                                                        | 16 |
| <b>Other information</b> |     |                                                                                                                                                                                                              |    |
| Funding                  | 22  | Give the source of funding and the role of the funders for the present study and, if applicable, for the original study on which the present article is based                                                | 20 |

\*Give information separately for exposed and unexposed groups.

**Note:** An Explanation and Elaboration article discusses each checklist item and gives methodological background and published examples of transparent reporting. The STROBE checklist is best used in conjunction with this article (freely available on the Web sites of PLoS Medicine at <http://www.plosmedicine.org/>, Annals of Internal Medicine at <http://www.annals.org/>, and Epidemiology at <http://www.epidem.com/>). Information on the STROBE Initiative is available at [www.strobe-statement.org](http://www.strobe-statement.org).
