# Supplementary material for: Physical morbidity and psychological and social comorbidities at five stages during pregnancy and after childbirth: a multicountry cross-sectional survey
Source: PubMed Central journal article supplement (PMC9039410; doi:10.1136/bmjopen-2021-050287), 2022-04-25
Supplement: bmjopen-2021-050287supp001.pdf [file bmjopen-2021-050287supp001.pdf]

## SUPPLEMENTARY TABLES

**Supplementary Table 1:** Number of women per country, per assessment stage and per healthcare facility level (n=11,454)

**Supplementary Table 2:** Infectious, medical, and obstetric morbidity identified per assessment stage for women living in India (n=2,099)

**Supplementary Table 3:** Infectious, medical, and obstetric morbidity identified per assessment stage for women living in Pakistan (n=3,287)

**Supplementary Table 4:** Infectious, medical, and obstetric morbidity identified per assessment stage for women living in Kenya (n=3,145)

**Supplementary Table 5:** Infectious, medical, and obstetric morbidity identified per assessment stage for women living in Malawi (n=2,923)

**Supplementary Table 6:** Psychological and social morbidity per assessment stage for women living in India (n=2,099)

**Supplementary Table 7:** Psychological and social morbidity of women per assessment stage for women living in for all countries combined for Pakistan (n= 3,287)

**Supplementary Table 8:** Psychological and social morbidity per assessment stage for women living in Kenya (n=3,145)

**Supplementary Table 9:** Psychological and social morbidity per assessment stage for women living in Malawi (n= 2,923)

**Supplementary Table 1:** Socio-demographic and obstetric characteristics of women by stage and for all stages combined (n=11,454)

| Assessment stage                  | First half of pregnancy | Second half of pregnancy | Within 24 hours of childbirth | Early postnatal | Late postnatal | Total  | P value |
|-----------------------------------|-------------------------|--------------------------|-------------------------------|-----------------|----------------|--------|---------|
| Number of women                   | 2,204                   | 2,425                    | 2,250                         | 2,264           | 2,311          | 11,454 |         |
|                                   | %                       | %                        | %                             | %               | %              | %      |         |
| <b>Age category (years)</b>       |                         |                          |                               |                 |                |        |         |
| <20                               | 11.0                    | 9.4                      | 11.2                          | 11.3            | 11.3           | 10.8   | 0.007   |
| 20-24                             | 28.8                    | 26.8                     | 30.6                          | 31.7            | 28.1           | 29.2   |         |
| 25-29                             | 30.7                    | 29.2                     | 29.4                          | 29.8            | 30.9           | 30.0   |         |
| 30-34                             | 15.7                    | 17.8                     | 16.4                          | 15.1            | 16.4           | 16.3   |         |
| ≥35                               | 8.0                     | 8.7                      | 6.6                           | 7.0             | 7.2            | 7.5    |         |
| <b>Parity</b>                     |                         |                          |                               |                 |                |        |         |
| 0 or 1                            | 34.8                    | 30.3                     | 35.7                          | 38.6            | 35.0           | 34.8   | <0.001  |
| 2-4                               | 54.7                    | 56.9                     | 50.8                          | 51.1            | 55.6           | 53.8   |         |
| ≥5                                | 5.9                     | 8.5                      | 6.1                           | 5.7             | 5.8            | 6.4    |         |
| <b>Marital status</b>             |                         |                          |                               |                 |                |        |         |
| Single                            | 6.2                     | 6.1                      | 4.9                           | 5.7             | 4.5            | 5.5    | 0.16    |
| Married                           | 92.7                    | 92.5                     | 94.1                          | 93.3            | 93.7           | 93.3   |         |
| <b>Socioeconomic status (SES)</b> |                         |                          |                               |                 |                |        |         |
| 1st quintile (upper)              | 13.7                    | 10.4                     | 10.8                          | 11.2            | 11.2           | 11.4   | <0.001  |
| 2nd quintile                      | 16.5                    | 15.8                     | 15.4                          | 17.4            | 16.7           | 16.3   |         |
| 3rd quintile                      | 31.0                    | 28.8                     | 30.1                          | 28.5            | 31.8           | 30.0   |         |
| 4th quintile                      | 27.5                    | 28.7                     | 29.4                          | 29.3            | 27.4           | 28.4   |         |
| 5th quintile (lower)              | 8.7                     | 12.1                     | 11.7                          | 10.6            | 10.3           | 10.7   |         |
| <b>Education level completed</b>  |                         |                          |                               |                 |                |        |         |
| None                              | 17.2                    | 18.0                     | 20.4                          | 20.9            | 19.3           | 19.2   | <0.001  |
| Primary                           | 33.1                    | 34.0                     | 35.9                          | 34.1            | 34.0           | 34.2   |         |
| Secondary                         | 30.0                    | 26.6                     | 25.7                          | 28.1            | 26.7           | 27.4   |         |
| Post-secondary                    | 15.9                    | 15.6                     | 13.1                          | 13.7            | 15.5           | 14.8   |         |

**Supplementary Table 2: Infectious, medical, and obstetric morbidity identified per assessment stage for women living in India (n=2,099)**

| Assessment stage                                          | First half of pregnancy | Second half of pregnancy | Within 24 hours of childbirth | Early postnatal    | Late postnatal     | Total               |
|-----------------------------------------------------------|-------------------------|--------------------------|-------------------------------|--------------------|--------------------|---------------------|
| Number of women <sup>a*</sup>                             | 416                     | 397                      | 423                           | 432                | 431                | 2099                |
|                                                           | n (%)                   | n (%)                    | n (%)                         | n (%)              | n (%)              | n (%)               |
| <b>INFECTIOUS MORBIDITY</b>                               |                         |                          |                               |                    |                    |                     |
| <b>Condition</b>                                          |                         |                          |                               |                    |                    |                     |
| HIV                                                       | 2 (0.5%)                | 2 (0.5%)                 | 1 (0.2%)                      | 1 (0.2%)           | 0                  | 6 (0.3%)            |
| Malaria                                                   | 0                       | 0                        | 0                             | 0                  | 2 (0.5%)           | 2 (0.1%)            |
| Syphilis                                                  | 0                       | 0                        | 0                             | 0                  | 0                  | 0                   |
| Positive screening for chest infection/possible TB        | 2 (0.5%)                | 1 (0.2%)                 | 1 (0.2%)                      | 2 (0.5%)           | 2 (0.5%)           | 8 (0.4%)            |
| Septic Inflammatory Response Syndrome (SIRS) <sup>b</sup> | 43 (10.3%)              | 66 (16.6%)               | 47 (11.1%)                    | 63 (14.6%)         | 70 (16.2%)         | 289 (13.8%)         |
| <b>MEDICAL OR OBSTETRIC MORBIDITY</b>                     |                         |                          |                               |                    |                    |                     |
| <b>Condition</b>                                          |                         |                          |                               |                    |                    |                     |
| Anaemia <sup>c</sup>                                      | 184 (44.2%)             | 228 (57.4%)              | 282 (66.7%)                   | 309 (71.5%)        | 265 (61.5%)        | 1268 (60.4%)        |
| Severe anaemia                                            | 4 (1.0%)                | 13 (3.3%)                | 12 (2.8%)                     | 17 (3.9%)          | 5 (1.2%)           | 51 (2.4%)           |
| Hypertension                                              | 2 (0.5%)                | 16 (4.0%)                | 7(1.6%)                       | 7 (1.6%)           | 1 (0.2%)           | 33 (1.6%)           |
| Low BMI (<18.5 kg/m <sup>2</sup> )                        | 30 (7.4%)               | 9 (2.3%)                 | 9 (2.1%)                      | 9 (2.1%)           | 10 (2.3%)          | 67 (3.2%)           |
| High BMI (> 30kg/m <sup>2</sup> )                         | 55 (13.6%)              | 153 (38.9%)              | 109 (26.0%)                   | 97 (22.5%)         | 107 (25%)          | 521 (25.1)          |
| Pre-eclampsia                                             | n/a                     | 0                        | 0                             | 1 (0.2%)           | n/a                | 1 (0.1%)            |
| Urine incontinence                                        | 13 (3.1%)               | 21 (5.3%)                | 0                             | 2 (0.5%)           | 0                  | 36 (1.7%)           |
| Antenatal haemorrhage                                     | 0                       | 0                        | n/a                           | n/a                | n/a                | 0                   |
| <b>At least 1 medical or obstetric condition</b>          | <b>202 (48.6%)</b>      | <b>254 (64.0%)</b>       | <b>285 (67.4%)</b>            | <b>311 (72.0%)</b> | <b>266 (61.7%)</b> | <b>1318 (62.8%)</b> |

<sup>a</sup> Where data were missing for a condition the condition was regarded as being absent for purposes of deriving morbidities

<sup>b</sup> CRP was not measured at some primary level facilities in Malawi and Pakistan. Only participants for whom a CRP result was obtained are included in these statistics.

<sup>c</sup> Anaemia is defined as Hb< 11.0g/dL and severe anaemia is defined as Hb<7g/dL

**Supplementary Table 3: Infectious, medical, and obstetric morbidity identified per assessment stage for women living in Pakistan (n=3,287)**

| Assessment stage                                          | First half of pregnancy | Second half of pregnancy | Within 24 hours of childbirth | Early postnatal    | Late postnatal     | Total               |
|-----------------------------------------------------------|-------------------------|--------------------------|-------------------------------|--------------------|--------------------|---------------------|
| Number of women <sup>a*</sup>                             | 607                     | 768                      | 654                           | 618                | 640                | 3287                |
|                                                           | n (%)                   | n (%)                    | n (%)                         | n (%)              | n (%)              | n (%)               |
| <b>INFECTIOUS MORBIDITY</b>                               |                         |                          |                               |                    |                    |                     |
| <b>Condition</b>                                          |                         |                          |                               |                    |                    |                     |
| HIV                                                       | 0                       | 1 (0.1%)                 | 7 (1.1%)                      | 2 (0.3%)           | 1 (0.2%)           | 11 (0.3%)           |
| Malaria                                                   | 0                       | 0                        | 0                             | 1 (0.2%)           | 0                  | 1 (0.03%)           |
| Syphilis                                                  | 0                       | 0                        | 0                             | 0                  | 0                  | 0                   |
| Positive screening for chest infection/ possible TB       | 7 (1.1%)                | 11 (1.4%)                | 2 (0.3%)                      | 2 (0.3%)           | 3 (0.5%)           | 25 (0.8%)           |
| Septic Inflammatory Response Syndrome (SIRS) <sup>b</sup> | 67 (11.0%)              | 122 (15.9%)              | 54 (8.3%)                     | 70 (11.3%)         | 55 (8.6%)          | 368 (11.2%)         |
| <b>MEDICAL OR OBSTETRIC MORBIDITY</b>                     |                         |                          |                               |                    |                    |                     |
| <b>Condition</b>                                          |                         |                          |                               |                    |                    |                     |
| Anaemia <sup>c</sup>                                      | 389 (64.1%)             | 590 (76.8%)              | 435 (66.5%)                   | 437 (70.7%)        | 375 (58.6%)        | 2226 (67.7%)        |
| Severe anaemia                                            | 9 (1.5%)                | 27 (3.5%)                | 18 (2.8%)                     | 22 (3.6%)          | 5 (0.8%)           | 81 (2.5%)           |
| Body mass index ≤18.5 kg/m <sup>2</sup>                   | 37 (6.2%)               | 16(2.2%)                 | 7(1.1%)                       | 11 (1.8%)          | 10 (1.6%)          | 81 (2.5%)           |
| High BMI (> 30kg/m <sup>2</sup> )                         | 289 (48.5%)             | 470 (63.2%)              | 306 (48.6%)                   | 325 (53.7%)        | 307 (49.8%)        | 1697 (53.2%)        |
| Hypertension                                              | 18 (3.0%)               | 67 (8.7%)                | 54 (8.3%)                     | 40 (6.5%)          | 27 (4.2%)          | 206 (6.3%)          |
| Pre-eclampsia                                             | n/a                     | 26 (3.4%)                | 8 (1.2%)                      | 6 (1.0%)           | n/a                | 40 (2.0%)           |
| Urine incontinence                                        | 40 (6.6%)               | 106 (13.8%)              | 64 (9.8%)                     | 39 (6.3%)          | 65 (10.2%)         | 314 (9.5%)          |
| Antenatal haemorrhage                                     | 80 (13.2%)              | 60 (7.8%)                | n/a                           | n/a                | n/a                | 140 (10.2%)         |
| <b>At least 1 medical or obstetric condition</b>          | <b>422 (69.5%)</b>      | <b>619 (80.6%)</b>       | <b>455 (69.6%)</b>            | <b>455 (73.6%)</b> | <b>388 (60.6%)</b> | <b>2339 (71.2%)</b> |

<sup>a</sup> Where data were missing for a condition the condition was regarded as being absent for purposes of deriving morbidities

<sup>b</sup> CRP was not measured at some primary level facilities in Malawi and Pakistan. Only participants for whom a CRP result was obtained are included in these statistics.

<sup>c</sup> Anaemia is defined as Hb< 11.0g/dL and severe anaemia is defined as Hb<7g/dL

**Supplementary Table 4: Infectious, medical, and obstetric morbidity identified per assessment stage for women living in Kenya (n=3,145)**

| Assessment stage | First half of pregnancy | Second half of pregnancy | Within 24 hours of childbirth | Early postnatal | Late postnatal | Total |
|------------------|-------------------------|--------------------------|-------------------------------|-----------------|----------------|-------|
|------------------|-------------------------|--------------------------|-------------------------------|-----------------|----------------|-------|

| Number of women <sup>a*</sup>                             | 592                | 684                | 592                | 620                | 657                | 3145               |
|-----------------------------------------------------------|--------------------|--------------------|--------------------|--------------------|--------------------|--------------------|
|                                                           | n (%)              | n (%)              | n (%)              | n (%)              | n (%)              | n (%)              |
| <b>INFECTIOUS MORBIDITY</b>                               |                    |                    |                    |                    |                    |                    |
| <b>Condition</b>                                          |                    |                    |                    |                    |                    |                    |
| HIV                                                       | 24 (4.0%)          | 19 (2.8%)          | 24 (4.0%)          | 25 (4.0%)          | 25 (3.8%)          | 117 (3.7%)         |
| Malaria                                                   | 2 (0.3%)           | 2 (0.3%)           | 1 (0.2%)           | 2 (0.3%)           | 0                  | 7 (0.2%)           |
| Syphilis                                                  | 2 (0.3%)           | 2 (0.3%)           | 1 (0.2%)           | 0                  | 3 (0.5%)           | 8 (0.2%)           |
| Positive screening for chest infection/ possible TB       | 3 (0.5%)           | 6 (0.9%)           | 5 (0.8%)           | 3 (0.5%)           | 5 (0.8%)           | 22 (0.7%)          |
| Septic Inflammatory Response Syndrome (SIRS) <sup>b</sup> | 206 (34.8%)        | 267 (39.0%)        | 197 (33.3%)        | 278 (44.8%)        | 199 (30.3%)        | 1147 (36.5%)       |
| <b>MEDICAL OR OBSTETRIC MORBIDITY</b>                     |                    |                    |                    |                    |                    |                    |
| <b>Condition</b>                                          |                    |                    |                    |                    |                    |                    |
| Anaemia <sup>c</sup>                                      | 102 (17.2%)        | 163 (23.8%)        | 146 (24.7%)        | 204 (32.9%)        | 130 (19.8%)        | 745 (23.7%)        |
| Severe anaemia                                            | 7 (1.2%)           | 4 (0.6%)           | 7 (1.2%)           | 12 (1.9%)          | 12 (1.8%)          | 65 (2.1%)          |
| Body mass index ≤18.5 kg/m <sup>2</sup>                   | 18 (3.1%)          | 8 (1.2%)           | 10 (1.7%)          | 7 (1.2%)           | 3 (0.5%)           | 46 (1.5%)          |
| High BMI (> 30kg/m <sup>2</sup> )                         | 278 (47.7%)        | 404 (59.8%)        | 328 (56.2%)        | 350 (57.6%)        | 325 (50.3%)        | 1685 (54.4%)       |
| Hypertension                                              | 7 (1.2%)           | 19 (2.8%)          | 13 (2.2%)          | 16 (2.6%)          | 15 (2.3%)          | 70 (2.2%)          |
| Pre-eclampsia                                             | n/a                | 8 (1.2%)           | 0                  | 4 (0.6%)           | n/a                | 12 (0.6%)          |
| Urine incontinence                                        | 12 (2.0%)          | 23 (3.4%)          | 2 (0.3%)           | 3 (0.5%)           | 9 (1.4%)           | 49 (1.6%)          |
| Antenatal haemorrhage                                     | 54 (9.1%)          | 12 (1.7%)          | n/a                | n/a                | n/a                | 66 (5.2%)          |
| <b>At least 1 medical or obstetric condition</b>          | <b>142 (24.0%)</b> | <b>197 (28.8%)</b> | <b>156 (26.3%)</b> | <b>214 (34.5%)</b> | <b>143 (21.8%)</b> | <b>852 (27.1%)</b> |

<sup>a</sup> Where data were missing for a condition the condition was regarded as being absent for purposes of deriving morbidities

<sup>b</sup> CRP was not measured at some primary level facilities in Malawi and Pakistan. Only participants for whom a CRP result was obtained are included in these statistics.

<sup>c</sup> Anaemia is defined as Hb < 11.0g/dL and severe anaemia is defined as Hb < 7g/dL

**Supplementary Table 5: Infectious, medical, and obstetric morbidity identified per assessment stage for women living in Malawi (n=2923)**

| Assessment stage                                          | First half of pregnancy | Second half of pregnancy | Within 24 hours of childbirth | Early postnatal | Late postnatal | Total        |
|-----------------------------------------------------------|-------------------------|--------------------------|-------------------------------|-----------------|----------------|--------------|
| Number of women <sup>a</sup>                              | 589                     | 576                      | 581                           | 594             | 583            | 2923         |
|                                                           | n (%)                   | n (%)                    | n (%)                         | n (%)           | n (%)          | n (%)        |
| <b>INFECTIOUS MORBIDITY</b>                               |                         |                          |                               |                 |                |              |
| HIV                                                       | 73 (12.4%)              | 85 (14.8%)               | 75 (12.9%)                    | 95(16.0%)       | 90(15.4%)      | 418 (14.3%)  |
| Malaria                                                   | 83 (14.1%)              | 71 (12.3%)               | 58 (10.0%)                    | 40 (6.7%)       | 47 (8.1%)      | 299 (10.2%)  |
| Syphilis                                                  | 34 (5.8%)               | 22 (3.8%)                | 18 (3.1%)                     | 16 (2.7%)       | 9 (1.5%)       | 99 (3.4%)    |
| Positive screening for chest infection/ possible TB       | 6 (1.0%)                | 6 (1.0%)                 | 2 (0.3%)                      | 5 (0.8%)        | 0              | 19 (0.7%)    |
| Septic Inflammatory Response Syndrome (SIRS) <sup>b</sup> | 164 (27.8%)             | 154 26.7(%)              | 174 (30.0%)                   | 179 (30.1%)     | 168 (28.8%)    | 839 (28.7%)  |
| <b>MEDICAL OR OBSTETRIC MORBIDITY</b>                     |                         |                          |                               |                 |                |              |
| Anaemia <sup>c</sup>                                      | 225 (38.2%)             | 245 (42.5%)              | 233 (40.1%)                   | 263 (44.3%)     | 215 (36.9%)    | 1181 (40.4%) |
| Severe anaemia                                            | 8 (1.4%)                | 3 (0.5%)                 | 4 (0.7%)                      | 12 (2.0%)       | 6 (1.0%)       | 33 (1.1%)    |
| Body mass index ≤18.5 kg/m <sup>2</sup>                   | 18 (3.1%)               | 7 (1.2%)                 | 19 (3.3%)                     | 22 (3.7%)       | 22 (3.8%)      | 88 (3.0%)    |
| High BMI (> 30kg/m <sup>2</sup> )                         | 164 (28.3%)             | 237 (41.6%)              | 169 (29.2%)                   | 186 (31.5%)     | 208 (36.1%)    | 964 (33.3%)  |
| Hypertension                                              | 6 (1.0%)                | 9 (1.6%)                 | 8 (1.4%)                      | 3 (0.5%)        | 5(0.9%)        | 31 (1.1%)    |
| Pre-eclampsia                                             | n/a                     | 17 (2.9%)                | 10 (1.7%)                     | 6 (1.0%)        | n/a            | 49 (2.8%)    |
| Urine incontinence                                        | 2 (0.3%)                | 11 (1.9%)                | 3 (0.5%)                      | 0               | 2 (0.3%)       | 18 (0.6%)    |
| Antenatal haemorrhage                                     | 5 (0.9%)                | 2 (0.4%)                 | n/a                           | n/a             | n/a            | 7 (0.6%)     |
| <b>At least one medical or obstetric condition</b>        | 232 (39.4%)             | 258 (44.8%)              | 239 (41.1%)                   | 265 (44.6%)     | 220 (37.7%)    | 1214 (41.5%) |

<sup>a</sup> Where data were missing for a condition the condition was regarded as being absent for purposes of deriving morbidities

<sup>b</sup> CRP was not measured at some primary level facilities in Malawi and Pakistan. Only participants for whom a CRP result was obtained are included in these statistics.

<sup>c</sup> Anaemia is defined as Hb< 11.0g/dL and severe anaemia is defined as Hb<7g/dL

**Supplementary Table 6: Psychological and social morbidity per assessment stage for women living in India (number of women assessed n=2099)**

| stage                                                                    | First half of pregnancy | Second half of pregnancy | Within 24 hours of childbirth | Early postnatal | Late postnatal | Total       |             |
|--------------------------------------------------------------------------|-------------------------|--------------------------|-------------------------------|-----------------|----------------|-------------|-------------|
| Number of women*                                                         | 416                     | 397                      | 423                           | 432             | 431            | 2099        |             |
|                                                                          | n %                     | n %                      | n %                           | n %             | n %            | n %         |             |
| <b>PSYCHOLOGICAL MORBIDITY</b>                                           |                         |                          |                               |                 |                |             |             |
| <b>EDPS ≥ 10</b>                                                         | 45 (10.8%)              | 103 (25.9%)              | 86 (20.3%)                    | 86 (19.9%)      | 84 (19.5%)     | 404 (19.2%) |             |
| <b>Thoughts of self-harm</b>                                             | 40 (9.6%)               | 79 (19.9%)               | 72 (17.0%)                    | 71 (16.4%)      | 66 (15.3%)     | 328 (15.6%) |             |
| <b>EDPS ≥ 10 and/or thoughts of self-harm</b>                            | 60 (14.4%)              | 116 (29.2%)              | 102 (24.1%)                   | 99 (22.9%)      | 95 (22.0%)     | 472 (22.5%) |             |
| <b>SOCIAL MORBIDITY</b>                                                  |                         |                          |                               |                 |                |             |             |
| <b>Domestic violence</b>                                                 |                         |                          |                               |                 |                |             |             |
| <b>HITS score &gt;4</b>                                                  | Husband and/or family   | 159 (38.2%)              | 173 (43.6%)                   | 153 (36.2%)     | 189 (43.7%)    | 159 (36.9%) | 833 (39.7%) |
|                                                                          | Husband                 | 154 (37.0%)              | 164 (41.3%)                   | 152 (35.9%)     | 185 (42.8%)    | 155 (36.0%) | 810 (38.6%) |
|                                                                          | Family                  | 35 (8.4%)                | 67 (16.9%)                    | 28 (6.6%)       | 52 (12.0%)     | 29 (6.7%)   | 211 (10.0%) |
| <b>HITS score &gt;10</b>                                                 | Husband and/or family   | 23 (5.5%)                | 36 (9.1%)                     | 18 (4.3%)       | 33 (7.6%)      | 17 (3.9%)   | 127 (6.0%)  |
|                                                                          | Husband                 | 19 (4.6%)                | 27 (6.8%)                     | 16 (3.8%)       | 30 (6.9%)      | 15 (3.5%)   | 107 (5.1%)  |
|                                                                          | Family                  | 8 (1.9%)                 | 22 (5.5%)                     | 3 (0.7%)        | 15 (3.5%)      | 8 (1.9%)    | 56 (2.7%)   |
| <b>Substance misuse</b>                                                  |                         |                          |                               |                 |                |             |             |
| <b>Use of alcohol, sedatives, inhalants, or tobacco in last 3 months</b> | 6 (1.4%)                | 9 (2.3%)                 | 4 (0.9%)                      | 12 (2.8%)       | 5 (1.2%)       | 36 (1.7%)   |             |
| <b>Intervention required</b>                                             | 4 (1.0%)                | 7 (1.8%)                 | 0                             | 5 (1.2%)        | 1 (0.2%)       | 17 (0.8%)   |             |

ASSIST: Alcohol, Smoking and Substance Involvement Screening Test; EPDS: Edinburgh Postnatal Depression Scale; HITS: Hurt, Insulted, Threatened, Screamed at.

**Supplementary Table 7: Psychological and social morbidity of women per assessment stage for women living in for all countries combined for Pakistan (number of women assessed n= 3287)**

| stage                                                                    |                       | First half of pregnancy | Second half of pregnancy | Within 24 hours of childbirth | Early postnatal | Late postnatal | Total           |
|--------------------------------------------------------------------------|-----------------------|-------------------------|--------------------------|-------------------------------|-----------------|----------------|-----------------|
| Number of women*                                                         |                       | 607                     | 768                      | 654                           | 618             | 640            | 3287            |
|                                                                          |                       | n %                     | n %                      | n %                           | n %             | n %            | n %             |
| <b>PSYCHOLOGICAL MORBIDITY</b>                                           |                       |                         |                          |                               |                 |                |                 |
| <b>EDPS ≥ 10</b>                                                         |                       | 277<br>(45.6%)          | 349<br>(45.4%)           | 243<br>(37.2%)                | 256<br>(41.4%)  | 243<br>(38.0%) | 1368<br>(41.6%) |
| <b>Thoughts of self-harm</b>                                             |                       | 130<br>(21.4%)          | 242<br>(31.5%)           | 194<br>(29.7%)                | 200<br>(32.4%)  | 212<br>(33.1%) | 978<br>(29.7%)  |
| <b>EDPS ≥ 10 and/or thoughts of self-harm</b>                            |                       | 297<br>(48.9%)          | 379<br>(49.3%)           | 323<br>(49.4%)                | 308<br>(49.8%)  | 315<br>(49.2%) | 1622<br>(49.3%) |
| <b>SOCIAL MORBIDITY</b>                                                  |                       |                         |                          |                               |                 |                |                 |
| <b>Domestic violence</b>                                                 |                       |                         |                          |                               |                 |                |                 |
| <b>HITS score &gt;4</b>                                                  | Husband and/or family | 308<br>(50.7%)          | 464<br>(60.4%)           | 371<br>(56.7%)                | 382<br>(61.8%)  | 314<br>(49.1%) | 1839<br>(55.9%) |
|                                                                          | Husband               | 183<br>(30.1%)          | 340<br>(44.3%)           | 255<br>(39.0%)                | 255<br>(41.3%)  | 195<br>(30.5%) | 1228<br>(37.4%) |
|                                                                          | Family                | 197<br>(32.4%)          | 246<br>(32.0%)           | 217<br>(33.2%)                | 199<br>(32.2%)  | 184<br>(28.7%) | 1043<br>(31.7%) |
| <b>HITS score &gt;10</b>                                                 | Husband and/or family | 109<br>(18.0%)          | 185<br>(24.1%)           | 103<br>(15.7%)                | 115<br>(18.6%)  | 104<br>(16.2%) | 616<br>(18.7%)  |
|                                                                          | Husband               | 64 (10.5%)              | 150<br>(19.5%)           | 59 (9.0%)                     | 70 (11.3%)      | 68<br>(10.6%)  | 411<br>(12.5%)  |
|                                                                          | Family                | 50 (8.2%)               | 47 (6.1%)                | 55 (8.4%)                     | 47 (7.6%)       | 47 (7.3%)      | 246<br>(7.5%)   |
| <b>Substance misuse</b>                                                  |                       |                         |                          |                               |                 |                |                 |
| <b>Use of alcohol, sedatives, inhalants, or tobacco in last 3 months</b> |                       | 61 (10.0%)              | 53 (6.9%)                | 45 (6.9%)                     | 74 (12.0%)      | 60 (9.4%)      | 293<br>(8.9%)   |
| <b>Intervention required</b>                                             |                       | 7 (1.1%)                | 13 (1.7%)                | 5 (0.8%)                      | 12 (1.9%)       | 20 (3.1%)      | 57 (1.7%)       |

ASSIST: Alcohol, Smoking and Substance Involvement Screening Test; EPDS: Edinburgh Postnatal Depression Scale; HITS: Hurt, Insulted, Threatened, Screamed at.



**Supplementary Table 8: Psychological and social morbidity per assessment stage for women living in Kenya (n=3145)**

| Assessment stage                                                         | First half of pregnancy | Second half of pregnancy | Within 24 hours of childbirth | Early postnatal | Late postnatal | Total              |             |
|--------------------------------------------------------------------------|-------------------------|--------------------------|-------------------------------|-----------------|----------------|--------------------|-------------|
| Number of women*                                                         | 592                     | 684                      | 592                           | 620             | 657            | 3145               |             |
|                                                                          | n %                     | n %                      | n %                           | n %             | n %            | n %                |             |
| <b>PSYCHOLOGICAL MORBIDITY</b>                                           |                         |                          |                               |                 |                |                    |             |
| <b>EDPS ≥ 10</b>                                                         | 86 (14.5%)              | 101 (14.8%)              | 81 (13.7%)                    | 72 (11.6%)      | 49 (7.5%)      | 389 (12.4%)        |             |
| <b>Thoughts of self-harm</b>                                             | 28 (4.7%)               | 47 (6.9%)                | 29 (4.9%)                     | 20 (3.2%)       | 19 (2.9%)      | 143 (4.5%)         |             |
| <b>EDPS ≥ 10 and/or thoughts of self-harm</b>                            | 94 (15.9%)              | 126 (18.4%)              | 95 (16.0%)                    | 84 (13.5%)      | 60 (9.1%)      | <b>459 (14.6%)</b> |             |
| <b>SOCIAL MORBIDITY</b>                                                  |                         |                          |                               |                 |                |                    |             |
| <b>Domestic violence</b>                                                 |                         |                          |                               |                 |                |                    |             |
| <b>HITS score &gt;4</b>                                                  | Husband and/or family   | 99 (16.7%)               | 201 (29.4%)                   | 130 (22.0%)     | 105 (17.0%)    | 144 (21.9%)        | 679 (21.6%) |
|                                                                          | Husband                 | 78 (13.2%)               | 176 (25.7%)                   | 108 (18.2%)     | 88 (14.2%)     | 125 (19.0%)        | 575 (18.3%) |
|                                                                          | Family                  | 29 (4.9%)                | 51 (7.5%)                     | 35 (5.9%)       | 24 (3.9%)      | 47 (7.1%)          | 186 (5.9%)  |
| <b>HITS score &gt;10</b>                                                 | Husband and/or family   | 9 (1.5%)                 | 26 (3.8%)                     | 22 (3.7%)       | 12 (1.9%)      | 17 (2.6%)          | 86 (2.7%)   |
|                                                                          | Husband                 | 8 (1.3%)                 | 24 (3.5%)                     | 18 (3.0%)       | 10 (1.6%)      | 15 (2.3%)          | 75 (2.4%)   |
|                                                                          | Family                  | 2 (0.3%)                 | 2 (0.3%)                      | 6 (1.0%)        | 2 (0.3%)       | 2 (0.3%)           | 14 (0.4%)   |
| <b>Substance misuse</b>                                                  |                         |                          |                               |                 |                |                    |             |
| <b>Use of alcohol, sedatives, inhalants, or tobacco in last 3 months</b> | 40 (6.8%)               | 27 (3.9%)                | 42 (7.1%)                     | 37 (6.0%)       | 63 (9.6%)      | 209 (6.6%)         |             |
| <b>Intervention required</b>                                             | 9 (1.5%)                | 6 (0.9%)                 | 9 (1.5%)                      | 8 (1.3%)        | 14 (2.1%)      | 46 (1.5%)          |             |

ASSIST: Alcohol, Smoking and Substance Involvement Screening Test; EPDS: Edinburgh Postnatal Depression Scale; HITS: Hurt, Insulted, Threatened, Screamed at.

**Supplementary Table 9: Psychological and social morbidity per assessment stage for women living in Malawi (number of women assessed n= 2923)**

| Assessment stage                                                         | First half of pregnancy | Second half of pregnancy | Within 24 hours of childbirth | Early postnatal | Late postnatal | Total       |             |
|--------------------------------------------------------------------------|-------------------------|--------------------------|-------------------------------|-----------------|----------------|-------------|-------------|
| Number of women*                                                         | 589                     | 576                      | 581                           | 594             | 583            | 2923        |             |
|                                                                          | n %                     | n %                      | n %                           | n %             | n %            | n %         |             |
| <b>PSYCHOLOGICAL MORBIDITY</b>                                           |                         |                          |                               |                 |                |             |             |
| <b>EDPS ≥ 10</b>                                                         | 86 (14.6%)              | 88 (15.3%)               | 101 (17.4%)                   | 89 (15.0%)      | 93 (15.9%)     | 457 (15.6%) |             |
| <b>Thoughts of self-harm</b>                                             | 48 (8.2%)               | 58 (10.1%)               | 64 (11.0%)                    | 60 (10.1%)      | 65 (11.1%)     | 295 (10.1%) |             |
| <b>EDPS ≥ 10 and/or thoughts of self-harm</b>                            | 91 (15.4%)              | 100 (17.4%)              | 110 (18.9%)                   | 100 (16.8%)     | 105 (18.0%)    | 506 (17.3%) |             |
| <b>SOCIAL MORBIDITY</b>                                                  |                         |                          |                               |                 |                |             |             |
| <b>Domestic violence</b>                                                 |                         |                          |                               |                 |                |             |             |
| <b>HITS score &gt;4</b>                                                  | Husband and/or family   | 91 (15.4%)               | 140 (24.3%)                   | 102 (17.6%)     | 94 (15.8%)     | 105 (18.0%) | 532 (18.2%) |
|                                                                          | Husband                 | 60 (10.2%)               | 96 (16.7%)                    | 82 (14.1%)      | 74 (12.5%)     | 85 (14.6%)  | 397 (13.6%) |
|                                                                          | Family                  | 67 (11.4%)               | 80 (13.9%)                    | 78 (13.4%)      | 66 (11.1%)     | 74 (12.7%)  | 365 (12.5%) |
| <b>HITS score &gt;10</b>                                                 | Husband and/or family   | 20 (3.4%)                | 29 (5.0%)                     | 29 (5.0%)       | 27 (4.5%)      | 32 (5.5%)   | 137 (4.7%)  |
|                                                                          | Husband                 | 10 (1.7%)                | 22 (3.8%)                     | 16 (2.7%)       | 17 (2.9%)      | 23 (3.9%)   | 88 (3.0%)   |
|                                                                          | Family                  | 14 (2.4%)                | 9 (1.6%)                      | 21 (3.6%)       | 15 (2.5%)      | 16 (2.7%)   | 75 (2.6%)   |
| <b>Substance misuse</b>                                                  |                         |                          |                               |                 |                |             |             |
| <b>Use of alcohol, sedatives, inhalants, or tobacco in last 3 months</b> | 28 (4.7%)               | 23 (4.0%)                | 31 (5.3%)                     | 23 (3.9%)       | 29 (5.0%)      | 134 (4.6%)  |             |
| <b>Intervention required</b>                                             | 18 (3.1%)               | 12 (2.1%)                | 20 (3.4%)                     | 17 (2.9%)       | 15 (2.6%)      | 82 (2.8%)   |             |

ASSIST: Alcohol, Smoking and Substance Involvement Screening Test; EPDS: Edinburgh Postnatal Depression Scale; HITS: Hurt, Insulted, Threatened, Screamed at.
